# Supplementary material
Source: publisher figshare collection journal article supplement (https://diabetesjournals.figshare.com/articles/dataset/_/23877852)
Supplement: Supplementary file 1 [file 1]

## Sheet: hRNA-SCR-VS-shRNA-S1PR2.DEseq2_
GeneID	Gene name	Length	hRNA-SCR-Expression	shRNA-S1PR2-Expression	log2FoldChange(shRNA-S1PR2/hRNA-SCR)	Padj	Up/Down-Regulation	Pvalue	Cellular Component	Molecular Function	Biological Process	Kegg Orthology	Nr Description
271639	Adcy10	5209	52.9336	0.17535	-8.2378	2.29031e-08	Down	1.58001e-10	GO:0016020//membrane;GO:0030425//dendrite;GO:0030424//axon;GO:0005634//nucleus;GO:0015630//microtubule cytoskeleton;GO:0005622//intracellular;GO:0005737//cytoplasm;GO:0048471//perinuclear region of cytoplasm;GO:0043025//neuronal cell body;GO:0030426//growth cone;GO:0031514//motile cilium;GO:0005829//cytosol;GO:0005739//mitochondrion;GO:0045177//apical part of cell;GO:0005886//plasma membrane;GO:0…	GO:0000287//magnesium ion binding;GO:0005524//ATP binding;GO:0004016//adenylate cyclase activity;GO:0071890//bicarbonate binding;GO:0051117//ATPase binding;GO:0030145//manganese ion binding	GO:0043065//positive regulation of apoptotic process;GO:0071241//cellular response to inorganic substance;GO:0035556//intracellular signal transduction;GO:0007283//spermatogenesis;GO:0003351//epithelial cilium movement;GO:0006171//cAMP biosynthetic process	K11265//adenylate cyclase 10 [EC:4.6.1.1]	XP_021053814.1//adenylate cyclase type 10 isoform X1 [Mus pahari]
22423	Wnt8b	3376	13.9377	0.342841	-5.34531	0.0150206	Down	0.000845482	GO:0005578//proteinaceous extracellular matrix	GO:0048018//receptor ligand activity;GO:0005102//receptor binding	GO:0060070//canonical Wnt signaling pathway;GO:0007275//multicellular organism development;GO:0016055//Wnt signaling pathway	K00714//wingless-type MMTV integration site family, member 8	NP_035850.2//protein Wnt-8b [Mus musculus]
66733	Kcng4	3822	5.74204	0.170914	-5.07022	0.0398889	Down	0.00300837	GO:0016021//integral component of membrane;GO:0005886//plasma membrane;GO:0008076//voltage-gated potassium channel complex	GO:0005249//voltage-gated potassium channel activity;GO:0044325//ion channel binding;GO:0005251//delayed rectifier potassium channel activity	GO:0051260//protein homooligomerization;GO:0071805//potassium ion transmembrane transport	K04903//potassium voltage-gated channel subfamily G member 4	NP_080010.2//potassium voltage-gated channel subfamily G member 4 [Mus musculus]
117229	Stk33	2402	9.72604	0.342332	-4.82838	0.036012	Down	0.00266462	GO:0005622//intracellular;GO:0048471//perinuclear region of cytoplasm	GO:0004674//protein serine/threonine kinase activity;GO:0005524//ATP binding	GO:0018107//peptidyl-threonine phosphorylation;GO:0018105//peptidyl-serine phosphorylation;GO:0035556//intracellular signal transduction;GO:0046777//protein autophosphorylation	K08813//serine/threonine kinase 33 [EC:2.7.11.1]	NP_473444.1//serine/threonine-protein kinase 33 isoform 1 [Mus musculus]
320127	Dgki	4598	61.2667	2.25624	-4.76311	1.62746e-08	Down	1.10286e-10	GO:0048786//presynaptic active zone;GO:0005634//nucleus;GO:0005654//nucleoplasm;GO:0060076//excitatory synapse;GO:0008021//synaptic vesicle;GO:0014069//postsynaptic density;GO:0005737//cytoplasm;GO:0097060//synaptic membrane;GO:0048471//perinuclear region of cytoplasm;GO:0043025//neuronal cell body;GO:0043234//protein complex;GO:0005829//cytosol;GO:0043679//axon terminus;GO:0043197//dendritic spi…	GO:0004143//diacylglycerol kinase activity;GO:0003951//NAD+ kinase activity;GO:0005524//ATP binding;GO:0005095//GTPase inhibitor activity;GO:0017016//Ras GTPase binding	GO:0007205//protein kinase C-activating G-protein coupled receptor signaling pathway;GO:0051966//regulation of synaptic transmission, glutamatergic;GO:0035556//intracellular signal transduction;GO:0046959//habituation;GO:0007269//neurotransmitter secretion;GO:0043087//regulation of GTPase activity;GO:0046579//positive regulation of Ras protein signal transduction;GO:1900452//regulation of long te…	K00901//diacylglycerol kinase (ATP) [EC:2.7.1.107]	NP_001074675.1//diacylglycerol kinase iota isoform 1 [Mus musculus]
57754	Cend1	1657	20.8342	0.929762	-4.48595	0.0091981	Down	0.000453166	GO:0016021//integral component of membrane	NA	GO:0030182//neuron differentiation;GO:0021941//negative regulation of cerebellar granule cell precursor proliferation;GO:0021702//cerebellar Purkinje cell differentiation;GO:0007628//adult walking behavior;GO:0021933//radial glia guided migration of cerebellar granule cell;GO:0021686//cerebellar granular layer maturation	NA	EDL18070.1//cell cycle exit and neuronal differentiation 1, isoform CRA_b, partial [Mus musculus]
17287	Mep1a	2937	63.1678	4.69744	-3.74924	4.43029e-05	Down	7.8977e-07	GO:0016020//membrane;GO:0070062//extracellular exosome;GO:0016021//integral component of membrane;GO:0017090//meprin A complex	GO:0004222//metalloendopeptidase activity;GO:0008270//zinc ion binding	NA	K01395//meprin A [EC:3.4.24.18]	NP_032611.2//meprin A subunit alpha [Mus musculus]
16398	Itga2	4235	37.1347	2.83645	-3.71061	0.000397911	Down	9.93562e-06	GO:0030424//axon;GO:0042995//cell projection;GO:0005634//nucleus;GO:0005925//focal adhesion;GO:0009897//external side of plasma membrane;GO:0048471//perinuclear region of cytoplasm;GO:0034666//integrin alpha2-beta1 complex;GO:0009986//cell surface;GO:0043679//axon terminus;GO:0005886//plasma membrane;GO:0045178//basal part of cell	GO:0038064//collagen receptor activity;GO:0046872//metal ion binding;GO:0098639//collagen binding involved in cell-matrix adhesion;GO:0001540//amyloid-beta binding;GO:0005178//integrin binding;GO:0005518//collagen binding;GO:0046982//protein heterodimerization activity;GO:0043236//laminin binding;GO:0032403//protein complex binding	GO:0043589//skin morphogenesis;GO:0051971//positive regulation of transmission of nerve impulse;GO:0060100//positive regulation of phagocytosis, engulfment;GO:0071260//cellular response to mechanical stimulus;GO:0033343//positive regulation of collagen binding;GO:0032967//positive regulation of collagen biosynthetic process;GO:0033627//cell adhesion mediated by integrin;GO:0014850//response to mu…	K06481//integrin alpha 2	NP_032422.2//integrin alpha-2 precursor [Mus musculus]
22445	Xlr3a	1694	129.373	10.9121	-3.56754	1.1532e-08	Down	7.39232e-11	GO:0000800//lateral element	NA	GO:0051321//meiotic cell cycle	K19528//synaptonemal complex protein 3	EDL26550.1//mCG114264, isoform CRA_b, partial [Mus musculus]
12840	Col9a2	2746	50.1102	4.29057	-3.54586	0.000913825	Down	2.68903e-05	NA	NA	NA	K08131//collagen, type IX, alpha	XP_022050171.1//collagen alpha-2(IX) chain [Acanthochromis polyacanthus]
100039206	Mup17	886	727.554	62.6272	-3.53819	0.0467839	Down	0.0036812	GO:0005634//nucleus;GO:0005615//extracellular space;GO:0005829//cytosol;GO:0005576//extracellular region	GO:0005009//insulin-activated receptor activity;GO:0005550//pheromone binding;GO:0005215//transporter activity;GO:0036094//small molecule binding	GO:0031649//heat generation;GO:0051897//positive regulation of protein kinase B signaling;GO:0051055//negative regulation of lipid biosynthetic process;GO:0045721//negative regulation of gluconeogenesis;GO:0042593//glucose homeostasis;GO:0006112//energy reserve metabolic process;GO:0070584//mitochondrion morphogenesis;GO:0045834//positive regulation of lipid metabolic process;GO:0071396//cellular…	K01830//prostaglandin-H2 D-isomerase [EC:5.3.99.2]	NP_001186935.1//major urinary protein 17 precursor [Mus musculus]
320865	Cdh18	2744	37.1789	3.26201	-3.51065	2.76877e-05	Down	4.52189e-07	GO:0016021//integral component of membrane;GO:0005886//plasma membrane	GO:0005509//calcium ion binding	GO:0007156//homophilic cell adhesion via plasma membrane adhesion molecules	K06805//cadherin 18, type 2	XP_017380135.1//PREDICTED: cadherin-18 isoform X1 [Cebus capucinus imitator]
69700	Col22a1	6128	24.3269	2.21294	-3.45851	0.00520107	Down	0.000222586	NA	NA	NA	K16630//collagen, type XXII, alpha	NP_081450.1//collagen alpha-1(XXII) chain precursor [Mus musculus]
333424	A4gnt	2757	167.372	15.3789	-3.44404	1.74539e-09	Down	8.41792e-12	GO:0016021//integral component of membrane;GO:0000139//Golgi membrane	GO:0008375//acetylglucosaminyltransferase activity	GO:0009101//glycoprotein biosynthetic process;GO:0006493//protein O-linked glycosylation;GO:0050680//negative regulation of epithelial cell proliferation	K08251//alpha 1,4-N-acetylglucosaminyltransferase [EC:2.4.1.-]	XP_006511307.3//PREDICTED: alpha-1,4-N-acetylglucosaminyltransferase isoform X1 [Mus musculus]
68283	9530077C05Rik	2173	26.4275	2.51623	-3.3927	0.0152553	Down	0.000861569	NA	NA	NA	NA	XP_006510628.1//PREDICTED: uncharacterized protein KIAA0895 isoform X1 [Mus musculus]
227120	Plcl1	6555	411.233	40.0353	-3.36061	6.27039e-11	Down	1.7992e-13	GO:0005886//plasma membrane;GO:0005737//cytoplasm	GO:0004435//phosphatidylinositol phospholipase C activity;GO:0050811//GABA receptor binding;GO:0004871//signal transducer activity;GO:0070679//inositol 1,4,5 trisphosphate binding	GO:0007214//gamma-aminobutyric acid signaling pathway;GO:0035556//intracellular signal transduction;GO:0032228//regulation of synaptic transmission, GABAergic;GO:0033135//regulation of peptidyl-serine phosphorylation;GO:1900122//positive regulation of receptor binding;GO:0006629//lipid metabolic process	K15375//inactive phospholipase C-like protein 1	NP_445908.1//inactive phospholipase C-like protein 1 [Rattus norvegicus]
75828	Hormad2	1343	41.6523	4.51346	-3.20609	3.80434e-06	Down	4.66833e-08	GO:0005634//nucleus;GO:0000795//synaptonemal complex;GO:0005694//chromosome	NA	GO:0051177//meiotic sister chromatid cohesion;GO:0051321//meiotic cell cycle	K15620//golgi phosphoprotein 3	NP_083734.1//HORMA domain-containing protein 2 [Mus musculus]
12487	Cd28	4317	56.2962	6.19449	-3.18398	7.49613e-06	Down	1.01138e-07	GO:0098636//protein complex involved in cell adhesion;GO:0009986//cell surface;GO:0009897//external side of plasma membrane;GO:0016021//integral component of membrane;GO:0005886//plasma membrane;GO:0001772//immunological synapse	GO:0002020//protease binding;GO:0005070//SH3/SH2 adaptor activity;GO:0019901//protein kinase binding	GO:0051897//positive regulation of protein kinase B signaling;GO:0032733//positive regulation of interleukin-10 production;GO:0097190//apoptotic signaling pathway;GO:0042102//positive regulation of T cell proliferation;GO:0046641//positive regulation of alpha-beta T cell proliferation;GO:0010629//negative regulation of gene expression;GO:0031295//T cell costimulation;GO:0045060//negative thymic T…	K06470//CD28 antigen	NP_031668.3//T-cell-specific surface glycoprotein CD28 precursor [Mus musculus]
237858	Trarg1	3237	16.9774	1.89022	-3.16699	0.010914	Down	0.000567686	GO:0016020//membrane;GO:0005623//cell;GO:0005622//intracellular;GO:0016021//integral component of membrane;GO:0005886//plasma membrane;GO:0030659//cytoplasmic vesicle membrane	NA	GO:0032869//cellular response to insulin stimulus;GO:0072659//protein localization to plasma membrane;GO:0045026//plasma membrane fusion;GO:0009607//response to biotic stimulus;GO:0044381//glucose import in response to insulin stimulus;GO:0099638//endosome to plasma membrane protein transport	K06566//interferon induced transmembrane protein	EDL12865.1//tumor suppressor candidate 5, partial [Mus musculus]
243881	Cyp2b23	2182	288.567	36.031	-3.0016	4.19409e-20	Down	1.5363e-23	NA	GO:0020037//heme binding;GO:0005506//iron ion binding;GO:0019825//oxygen binding;GO:0016712//oxidoreductase activity, acting on paired donors, with incorporation or reduction of molecular oxygen, reduced flavin or flavoprotein as one donor, and incorporation of one atom of oxygen	GO:0006805//xenobiotic metabolic process	K07412//cytochrome P450 family 2 subfamily B [EC:1.14.14.1]	NP_942028.1//cytochrome P450, family 2, subfamily b, polypeptide 21 precursor [Rattus norvegicus]
13088	Cyp2b10	1878	29850.5	3750.41	-2.99264	7.90608e-06	Down	1.07945e-07	NA	GO:0020037//heme binding;GO:0005506//iron ion binding;GO:0016712//oxidoreductase activity, acting on paired donors, with incorporation or reduction of molecular oxygen, reduced flavin or flavoprotein as one donor, and incorporation of one atom of oxygen	NA	K07412//cytochrome P450 family 2 subfamily B [EC:1.14.14.1]	P00176.1//RecName: Full=Cytochrome P450 2B1; AltName: Full=CYPIIB1; AltName: Full=Cytochrome P450-B; Short=Cytochrome P450b; AltName: Full=Cytochrome P450-LM2; AltName: Full=Cytochrome P450-PB1; AltName: Full=Cytochrome P450-PB2
53417	Hif3a	6916	101.854	13.3665	-2.9298	0.00262067	Down	9.69554e-05	GO:0005634//nucleus;GO:0005654//nucleoplasm;GO:0005829//cytosol;GO:0016607//nuclear speck;GO:0005739//mitochondrion;GO:0005886//plasma membrane;GO:0005737//cytoplasm	GO:0000981//RNA polymerase II transcription factor activity, sequence-specific DNA binding;GO:0003677//DNA binding;GO:0003714//transcription corepressor activity;GO:0003713//transcription coactivator activity;GO:0003700//DNA binding transcription factor activity;GO:0046983//protein dimerization activity	GO:0006357//regulation of transcription from RNA polymerase II promoter;GO:0001525//angiogenesis;GO:0045944//positive regulation of transcription from RNA polymerase II promoter;GO:0006366//transcription from RNA polymerase II promoter;GO:0001666//response to hypoxia;GO:0006915//apoptotic process	K09096//hypoxia-inducible factor 3 alpha	NP_058564.2//hypoxia-inducible factor 3-alpha isoform 2 [Mus musculus];NP_001156422.1//hypoxia-inducible factor 3-alpha isoform 1 [Mus musculus]
55990	Fmo2	3336	851.822	114.257	-2.89827	0.00165901	Down	5.50977e-05	NA	NA	NA	K00485//dimethylaniline monooxygenase (N-oxide forming) [EC:1.14.13.8]	XP_005364033.1//PREDICTED: dimethylaniline monooxygenase [N-oxide-forming] 2 [Microtus ochrogaster]
50786	Hs6st2	4313	26.9811	3.6744	-2.87637	0.0367673	Down	0.00272724	GO:0070062//extracellular exosome;GO:0005654//nucleoplasm;GO:0016021//integral component of membrane	GO:0008146//sulfotransferase activity;GO:0017095//heparan sulfate 6-O-sulfotransferase activity	GO:0015015//heparan sulfate proteoglycan biosynthetic process, enzymatic modification	K08102//heparan sulfate 6-O-sulfotransferase HS6ST2 [EC:2.8.2.-]	NP_001070670.1//heparan-sulfate 6-O-sulfotransferase 2 isoform 1 [Mus musculus];NP_001277396.1//heparan-sulfate 6-O-sulfotransferase 2 isoform 3 [Mus musculus]
15168	Hcn3	3268	2124.72	296.517	-2.84109	0.000471551	Down	1.24077e-05	GO:0030425//dendrite;GO:0030424//axon;GO:0043025//neuronal cell body;GO:0005887//integral component of plasma membrane;GO:0044316//cone cell pedicle;GO:0016021//integral component of membrane;GO:0005886//plasma membrane;GO:0045202//synapse	GO:0030552//cAMP binding;GO:0005249//voltage-gated potassium channel activity;GO:0005248//voltage-gated sodium channel activity	GO:1903351//cellular response to dopamine;GO:0035725//sodium ion transmembrane transport;GO:0072718//response to cisplatin;GO:0071805//potassium ion transmembrane transport;GO:0042391//regulation of membrane potential	K04956//hyperpolarization activated cyclic nucleotide-gated potassium channel 3	NP_032253.1//potassium/sodium hyperpolarization-activated cyclic nucleotide-gated channel 3 [Mus musculus]
20448	St6galnac4	3699	228.145	34.0215	-2.74543	1.85786e-09	Down	9.07381e-12	NA	NA	NA	K03374//N-acetylgalactosaminide alpha-2,6-sialyltransferase (sialyltransferase 7D) [EC:2.4.99.7]	Q9R2B6.1//RecName: Full=Alpha-N-acetyl-neuraminyl-2,3-beta-galactosyl-1,3-N-acetyl-galactosaminide alpha-2,6-sialyltransferase; AltName: Full=NeuAc-alpha-2,3-Gal-beta-1,3-GalNAc-alpha-2,6-sialyltransferase; AltName: Full=ST6GalNAc IV; Short=ST6GalNAcIV; AltName: Full=Sialyltransferase 7D; Short=SIAT7-D;BAE26116.1//unnamed protein product, partial [Mus musculus]
234911	Mmp27	1656	108.491	16.6407	-2.70479	0.00407522	Down	0.000165447	GO:0031012//extracellular matrix;GO:0042406//extrinsic component of endoplasmic reticulum membrane	GO:0004222//metalloendopeptidase activity;GO:0008270//zinc ion binding	NA	K08005//matrix metalloproteinase-27 [EC:3.4.24.-]	NP_001297646.1//matrix metalloproteinase-27 [Mus musculus]
13090	Cyp2b19	2765	256.201	39.4814	-2.69803	3.9914e-11	Down	1.09654e-13	GO:0043231//intracellular membrane-bounded organelle;GO:0031090//organelle membrane;GO:0005789//endoplasmic reticulum membrane	GO:0008395//steroid hydroxylase activity;GO:0020037//heme binding;GO:0005506//iron ion binding;GO:0070330//aromatase activity;GO:0016712//oxidoreductase activity, acting on paired donors, with incorporation or reduction of molecular oxygen, reduced flavin or flavoprotein as one donor, and incorporation of one atom of oxygen;GO:0008392//arachidonic acid epoxygenase activity	GO:0019373//epoxygenase P450 pathway	K07412//cytochrome P450 family 2 subfamily B [EC:1.14.14.1]	NP_058852.1//cytochrome P450 2B12 precursor [Rattus norvegicus]
229599	Ciart	1395	146.524	23.2165	-2.65791	1.12021e-06	Down	1.14894e-08	GO:0016605//PML body;GO:0005634//nucleus	GO:0070888//E-box binding;GO:0001046//core promoter sequence-specific DNA binding	GO:0045892//negative regulation of transcription, DNA-templated;GO:0045475//locomotor rhythm;GO:0006351//transcription, DNA-templated;GO:0032922//circadian regulation of gene expression	K21599//circadian-associated transcriptional repressor	NP_001028474.1//circadian-associated transcriptional repressor [Mus musculus]
81840	Sorcs2	5722	75.4858	12.5867	-2.5843	2.40588e-07	Down	2.10037e-09	GO:0005794//Golgi apparatus;GO:0016021//integral component of membrane	NA	GO:0006810//transport	K12388//sortilin	BAC41477.1//mKIAA1329 protein, partial [Mus musculus]
71096	Sntg1	6999	71.6901	12.2528	-2.54866	5.41156e-05	Down	9.87825e-07	GO:0005856//cytoskeleton;GO:0005634//nucleus;GO:0032587//ruffle membrane;GO:0005737//cytoplasm	GO:0003779//actin binding;GO:0008022//protein C-terminus binding;GO:0005198//structural molecule activity	NA	K05631//atrophin-1 interacting protein 3 (BAI1-associated protein 1);K12196//vacuolar protein-sorting-associated protein 4	EDL14274.1//syntrophin, gamma 1, isoform CRA_c, partial [Mus musculus];XP_021012248.1//gamma-1-syntrophin isoform X2 [Mus caroli];XP_021012241.1//gamma-1-syntrophin isoform X1 [Mus caroli]
19220	Ptgfr	4414	82.738	14.5989	-2.50269	0.0240774	Down	0.00157429	GO:0016021//integral component of membrane;GO:0005576//extracellular region;GO:0005886//plasma membrane;GO:0005737//cytoplasm	GO:0004958//prostaglandin F receptor activity	GO:0032355//response to estradiol;GO:0032496//response to lipopolysaccharide;GO:0043066//negative regulation of apoptotic process;GO:0035584//calcium-mediated signaling using intracellular calcium source;GO:0010628//positive regulation of gene expression;GO:0008284//positive regulation of cell proliferation;GO:0071799//cellular response to prostaglandin D stimulus	K04262//prostaglandin F receptor	NP_032992.1//prostaglandin F2-alpha receptor [Mus musculus]
13094	Cyp2b9	1877	47.5653	8.42513	-2.49714	0.00107737	Down	3.27553e-05	NA	GO:0008395//steroid hydroxylase activity;GO:0020037//heme binding;GO:0005506//iron ion binding;GO:0016712//oxidoreductase activity, acting on paired donors, with incorporation or reduction of molecular oxygen, reduced flavin or flavoprotein as one donor, and incorporation of one atom of oxygen;GO:0008392//arachidonic acid epoxygenase activity	GO:0019373//epoxygenase P450 pathway	K07412//cytochrome P450 family 2 subfamily B [EC:1.14.14.1]	XP_021023361.1//cytochrome P450 2B9-like [Mus caroli]
21819	Tg	8462	30.7781	5.50966	-2.48187	0.0205478	Down	0.00127577	NA	NA	NA	K10809//thyroglobulin	EDL29375.1//thyroglobulin, isoform CRA_b, partial [Mus musculus]
17777	Mttp	3966	13401.4	2412.47	-2.47379	1.65845e-51	Down	1.01248e-55	GO:0016323//basolateral plasma membrane;GO:0005783//endoplasmic reticulum;GO:0005791//rough endoplasmic reticulum;GO:0005794//Golgi apparatus;GO:0031526//brush border membrane;GO:0031528//microvillus membrane;GO:0031982//vesicle;GO:0043235//receptor complex	GO:0005319//lipid transporter activity;GO:0008289//lipid binding;GO:0046982//protein heterodimerization activity;GO:0034185//apolipoprotein binding;GO:0005548//phospholipid transporter activity	GO:0007623//circadian rhythm;GO:0008203//cholesterol metabolic process;GO:0034197//triglyceride transport;GO:0006641//triglyceride metabolic process;GO:0034377//plasma lipoprotein particle assembly;GO:0051592//response to calcium ion;GO:0009306//protein secretion;GO:0006497//protein lipidation;GO:0015914//phospholipid transport;GO:0042632//cholesterol homeostasis;GO:0042953//lipoprotein transport…	K14463//microsomal triglyceride transfer protein large subunit	NP_001156929.1//microsomal triglyceride transfer protein large subunit isoform 1 precursor [Mus musculus];NP_032668.2//microsomal triglyceride transfer protein large subunit isoform 2 precursor [Mus musculus]
13089	Cyp2b13	1876	573.593	104.873	-2.45138	2.36959e-11	Down	5.78655e-14	GO:0031090//organelle membrane;GO:0005789//endoplasmic reticulum membrane	GO:0008395//steroid hydroxylase activity;GO:0020037//heme binding;GO:0005506//iron ion binding;GO:0070330//aromatase activity;GO:0016712//oxidoreductase activity, acting on paired donors, with incorporation or reduction of molecular oxygen, reduced flavin or flavoprotein as one donor, and incorporation of one atom of oxygen;GO:0008392//arachidonic acid epoxygenase activity	GO:0035634//response to stilbenoid;GO:0019373//epoxygenase P450 pathway	K07412//cytochrome P450 family 2 subfamily B [EC:1.14.14.1]	XP_021023361.1//cytochrome P450 2B9-like [Mus caroli]
18406	Orm2	774	2880.78	545.926	-2.39968	0.0249174	Down	0.00164291	GO:0005615//extracellular space	NA	GO:0006810//transport;GO:0002682//regulation of immune system process;GO:0006953//acute-phase response	K17308//alpha-1-acid glycoprotein 1	NP_035146.1//alpha-1-acid glycoprotein 2 precursor [Mus musculus]
75746	Morc4	4108	413.458	81.8409	-2.33685	1.9367e-18	Down	1.18235e-21	NA	NA	NA	NA	EDL23918.1//microrchidia 4, isoform CRA_a, partial [Mus musculus];XP_011246063.1//PREDICTED: MORC family CW-type zinc finger protein 4 isoform X2 [Mus musculus]
14245	Lpin1	5587	8024.08	1589.25	-2.33599	0.00742962	Down	0.000351977	GO:0005634//nucleus;GO:0031965//nuclear membrane;GO:0005667//transcription factor complex;GO:0005741//mitochondrial outer membrane;GO:0005789//endoplasmic reticulum membrane;GO:0005737//cytoplasm	GO:0003713//transcription coactivator activity;GO:0042826//histone deacetylase binding;GO:0008195//phosphatidate phosphatase activity;GO:0001085//RNA polymerase II transcription factor binding;GO:0042975//peroxisome proliferator activated receptor binding	GO:0006642//triglyceride mobilization;GO:0031529//ruffle organization;GO:0031532//actin cytoskeleton reorganization;GO:0045598//regulation of fat cell differentiation;GO:0006351//transcription, DNA-templated;GO:0032869//cellular response to insulin stimulus;GO:0000122//negative regulation of transcription from RNA polymerase II promoter;GO:0031065//positive regulation of histone deacetylation;GO:…	K15728//phosphatidate phosphatase LPIN [EC:3.1.3.4]	XP_006515040.1//PREDICTED: phosphatidate phosphatase LPIN1 isoform X3 [Mus musculus];XP_006515045.1//PREDICTED: phosphatidate phosphatase LPIN1 isoform X5 [Mus musculus]
67606	Fibin	2069	15.5659	3.16044	-2.30019	0.031404	Down	0.00222013	GO:0005783//endoplasmic reticulum;GO:0005794//Golgi apparatus;GO:0005576//extracellular region	GO:0042803//protein homodimerization activity	GO:0010042//response to manganese ion;GO:1904627//response to phorbol 13-acetate 12-myristate;GO:0071548//response to dexamethasone	NA	NP_080547.1//fin bud initiation factor homolog precursor [Mus musculus]
29866	Cabp2	1057	26.0676	5.43551	-2.26177	0.00391131	Down	0.000158315	GO:0005794//Golgi apparatus;GO:0005886//plasma membrane;GO:0048471//perinuclear region of cytoplasm	GO:0005509//calcium ion binding	NA	K02183//calmodulin	NP_038906.2//calcium-binding protein 2 isoform 1 [Mus musculus];XP_006531828.1//PREDICTED: calcium-binding protein 2 isoform X3 [Mus musculus];NP_001153724.1//calcium-binding protein 2 isoform 2 [Mus musculus]
14229	Fkbp5	3884	7421.05	1584.41	-2.22768	0.0108211	Down	0.000558894	GO:0016020//membrane;GO:0070062//extracellular exosome;GO:0005654//nucleoplasm;GO:0005737//cytoplasm	GO:0003755//peptidyl-prolyl cis-trans isomerase activity;GO:0031072//heat shock protein binding;GO:0005528//FK506 binding	GO:0061077//chaperone-mediated protein folding	K09571//FK506-binding protein 4/5 [EC:5.2.1.8]	NP_034350.1//peptidyl-prolyl cis-trans isomerase FKBP5 [Mus musculus]
195531	Zfp982	1256	148.162	32.0616	-2.20826	8.20279e-10	Down	3.35523e-12	GO:0005622//intracellular	GO:0046872//metal ion binding;GO:0003676//nucleic acid binding	GO:0006355//regulation of transcription, DNA-templated	K09228//KRAB domain-containing zinc finger protein	XP_017174467.1//PREDICTED: gastrula zinc finger protein XlCGF26.1-like [Mus musculus]
12491	Cd36	3455	3504.63	767.666	-2.19071	4.58448e-08	Down	3.35859e-10	GO:0005615//extracellular space;GO:0009986//cell surface;GO:0009897//external side of plasma membrane;GO:0016324//apical plasma membrane;GO:0031526//brush border membrane;GO:0016021//integral component of membrane;GO:0045177//apical part of cell	GO:0008289//lipid binding;GO:0071813//lipoprotein particle binding;GO:0030169//low-density lipoprotein particle binding;GO:0070892//lipoteichoic acid receptor activity;GO:0008035//high-density lipoprotein particle binding	GO:0007155//cell adhesion;GO:1990000//amyloid fibril formation;GO:0006955//immune response;GO:0007166//cell surface receptor signaling pathway;GO:1904646//cellular response to amyloid-beta;GO:0043277//apoptotic cell clearance	K06259//CD36 antigen	NP_031669.3//platelet glycoprotein 4 [Mus musculus]
76574	Mfsd2a	2166	2298.24	506.131	-2.18295	0.00544156	Down	0.000236864	GO:0005887//integral component of plasma membrane;GO:0005789//endoplasmic reticulum membrane	GO:0051978//lysophospholipid transporter activity;GO:0015245//fatty acid transmembrane transporter activity;GO:0015293//symporter activity;GO:0005548//phospholipid transporter activity	GO:1990379//lipid transport across blood brain barrier;GO:0015908//fatty acid transport;GO:0051977//lysophospholipid transport;GO:0021766//hippocampus development;GO:0060856//establishment of blood-brain barrier;GO:0045056//transcytosis	K08824//cyclin-dependent kinase-like [EC:2.7.11.22]	NP_083938.2//sodium-dependent lysophosphatidylcholine symporter 1 [Mus musculus]
83961	Nrg4	1952	578.676	128.784	-2.1678	1.1655e-07	Down	9.25004e-10	GO:0005615//extracellular space;GO:0005622//intracellular;GO:0016021//integral component of membrane;GO:0005886//plasma membrane	GO:0008083//growth factor activity;GO:0005102//receptor binding	GO:0048513//animal organ development;GO:0035556//intracellular signal transduction	K05458//neuregulin 4	NP_114391.1//pro-neuregulin-4, membrane-bound isoform [Mus musculus]
20531	Slc34a2	4185	505.635	113.03	-2.16139	4.99421e-07	Down	4.69541e-09	GO:0005903//brush border;GO:0016324//apical plasma membrane;GO:0016021//integral component of membrane;GO:0031982//vesicle;GO:0005737//cytoplasm	GO:0042301//phosphate ion binding;GO:0005436//sodium:phosphate symporter activity;GO:0031402//sodium ion binding;GO:0015321//sodium-dependent phosphate transmembrane transporter activity	GO:0006817//phosphate ion transport;GO:0030643//cellular phosphate ion homeostasis;GO:0001701//in utero embryonic development;GO:0043627//response to estrogen	K14683//solute carrier family 34 (sodium-dependent phosphate cotransporter)	XP_006503870.1//PREDICTED: sodium-dependent phosphate transport protein 2B isoform X1 [Mus musculus]
116939	Pnpla3	4649	79.9254	17.8902	-2.15949	0.00323997	Down	0.000125603	GO:0016020//membrane;GO:0005811//lipid droplet;GO:0016021//integral component of membrane;GO:0005737//cytoplasm	GO:0036042//long-chain fatty acyl-CoA binding;GO:0051265//diolein transacylation activity;GO:0004806//triglyceride lipase activity;GO:0051264//mono-olein transacylation activity;GO:0035727//lysophosphatidic acid binding;GO:0004623//phospholipase A2 activity;GO:0042171//lysophosphatidic acid acyltransferase activity	GO:0019433//triglyceride catabolic process;GO:0036153//triglyceride acyl-chain remodeling;GO:0002021//response to dietary excess;GO:0034389//lipid particle organization;GO:0001676//long-chain fatty acid metabolic process;GO:0006654//phosphatidic acid biosynthetic process;GO:0006650//glycerophospholipid metabolic process;GO:0055088//lipid homeostasis;GO:0019432//triglyceride biosynthetic process	K13534//patatin-like phospholipase domain-containing protein 3 [EC:3.1.1.3 2.3.1.-]	NP_473429.2//patatin-like phospholipase domain-containing protein 3 [Mus musculus]
103140	Gstt3	1873	3188.03	721.025	-2.14454	2.88679e-13	Down	4.40597e-16	GO:0005737//cytoplasm	GO:0004364//glutathione transferase activity	GO:0006749//glutathione metabolic process	K00799//glutathione S-transferase [EC:2.5.1.18]	NP_598755.1//glutathione S-transferase theta-3 isoform 1 [Mus musculus]
110196	Fdps	1279	6609.36	1501.62	-2.13799	0.01232	Down	0.000663387	GO:0005654//nucleoplasm;GO:0005829//cytosol;GO:0005739//mitochondrion	GO:0003723//RNA binding;GO:0046872//metal ion binding;GO:0004337//geranyltranstransferase activity;GO:0004161//dimethylallyltranstransferase activity;GO:0016740//transferase activity	GO:0008299//isoprenoid biosynthetic process;GO:0045337//farnesyl diphosphate biosynthetic process;GO:0033384//geranyl diphosphate biosynthetic process;GO:0006695//cholesterol biosynthetic process	K00787//farnesyl diphosphate synthase [EC:2.5.1.1 2.5.1.10]	NP_001240680.1//farnesyl pyrophosphate synthase isoform 1 precursor [Mus musculus]
446101	Xrra1	2631	92.8553	21.8332	-2.08846	5.15898e-09	Down	2.92909e-11	GO:0005634//nucleus;GO:0005654//nucleoplasm;GO:0016604//nuclear body;GO:0005737//cytoplasm	NA	GO:0010165//response to X-ray	K21768//tubulin-specific chaperone E;K18808//toll-like receptor 13	NP_001157730.1//X-ray radiation resistance-associated protein 1 [Mus musculus]
212892	Rsph4a	3650	33.0497	7.98644	-2.04901	0.0186623	Down	0.00113022	GO:0001534//radial spoke;GO:0005737//cytoplasm;GO:0005930//axoneme	NA	GO:0003341//cilium movement;GO:0035082//axoneme assembly	K19756//radial spoke head protein 4A	NP_001156429.1//radial spoke head protein 4 homolog A [Mus musculus]
243659	Styk1	3378	1096.47	266.066	-2.04301	6.45654e-11	Down	1.89203e-13	GO:0031234//extrinsic component of cytoplasmic side of plasma membrane;GO:0016021//integral component of membrane;GO:0005886//plasma membrane	GO:0004715//non-membrane spanning protein tyrosine kinase activity;GO:0005524//ATP binding;GO:0005102//receptor binding	GO:0016477//cell migration;GO:0038083//peptidyl-tyrosine autophosphorylation;GO:0030154//cell differentiation;GO:0042127//regulation of cell proliferation;GO:0007155//cell adhesion;GO:0007173//epidermal growth factor receptor signaling pathway;GO:0043304//regulation of mast cell degranulation;GO:0006935//chemotaxis;GO:0045087//innate immune response	K17510//tyrosine-protein kinase STYK1 [EC:2.7.10.2]	NP_766479.1//tyrosine-protein kinase STYK1 [Mus musculus]
19252	Dusp1	1952	1514.94	374.088	-2.01781	4.7758e-11	Down	1.34119e-13	GO:0005634//nucleus;GO:0005737//cytoplasm	GO:0008330//protein tyrosine/threonine phosphatase activity;GO:0017017//MAP kinase tyrosine/serine/threonine phosphatase activity;GO:0008138//protein tyrosine/serine/threonine phosphatase activity;GO:0004725//protein tyrosine phosphatase activity;GO:0019838//growth factor binding	GO:0090266//regulation of mitotic cell cycle spindle assembly checkpoint;GO:0035335//peptidyl-tyrosine dephosphorylation;GO:0043407//negative regulation of MAP kinase activity;GO:0009416//response to light stimulus;GO:0001706//endoderm formation;GO:0035556//intracellular signal transduction;GO:0000188//inactivation of MAPK activity;GO:0043065//positive regulation of apoptotic process;GO:0033574//…	K21278//dual specificity protein phosphatase 1 [EC:3.1.3.16 3.1.3.48]	NP_038670.1//dual specificity protein phosphatase 1 [Mus musculus]
381994	E030018B13Rik	1015	728.402	181.506	-2.00472	7.47398e-14	Down	9.58203e-17	NA	NA	NA	NA	EDL07268.1//mCG145072, partial [Mus musculus]
21835	Thrsp	1051	20949.2	5223.98	-2.00368	5.85102e-16	Down	5.71528e-19	GO:0005654//nucleoplasm;GO:0005829//cytosol	GO:0042802//identical protein binding;GO:0042803//protein homodimerization activity	GO:0006355//regulation of transcription, DNA-templated;GO:0010866//regulation of triglyceride biosynthetic process;GO:0006351//transcription, DNA-templated;GO:0046890//regulation of lipid biosynthetic process;GO:0006629//lipid metabolic process	K08328//guanylate cyclase activator 1	EDL16295.1//thyroid hormone responsive SPOT14 homolog (Rattus), isoform CRA_b [Mus musculus]
21847	Klf10	3056	1753.78	437.808	-2.0021	2.19024e-08	Down	1.4976e-10	GO:0005634//nucleus	GO:0000978//RNA polymerase II proximal promoter sequence-specific DNA binding;GO:0046872//metal ion binding;GO:0003677//DNA binding;GO:0001046//core promoter sequence-specific DNA binding;GO:0001077//transcriptional activator activity, RNA polymerase II proximal promoter sequence-specific DNA binding;GO:0003676//nucleic acid binding	GO:0045892//negative regulation of transcription, DNA-templated;GO:0007623//circadian rhythm;GO:0030282//bone mineralization;GO:0009267//cellular response to starvation;GO:0006355//regulation of transcription, DNA-templated;GO:1901653//cellular response to peptide;GO:0035019//somatic stem cell population maintenance;GO:0045672//positive regulation of osteoclast differentiation;GO:0042752//regulat…	K09209//krueppel-like factor 10/11	NP_038720.1//Krueppel-like factor 10 isoform 1 [Mus musculus];NP_001276400.1//Krueppel-like factor 10 isoform 2 [Mus musculus]
230806	Crybg2	4781	126.313	31.8237	-1.98883	2.76877e-05	Down	4.46967e-07	NA	NA	NA	K11422//histone-lysine N-methyltransferase SETD1 [EC:2.1.1.43]	XP_006538811.1//PREDICTED: absent in melanoma 1-like protein isoform X1 [Mus musculus]
13119	Cyp4a14	2503	22443.8	5683.48	-1.98147	0.0486309	Down	0.00385069	GO:0043231//intracellular membrane-bounded organelle;GO:0031090//organelle membrane;GO:0005789//endoplasmic reticulum membrane	GO:0020037//heme binding;GO:0008391//arachidonic acid monooxygenase activity;GO:0005506//iron ion binding;GO:0018685//alkane 1-monooxygenase activity	GO:0048252//lauric acid metabolic process;GO:0001822//kidney development;GO:0046456//icosanoid biosynthetic process;GO:0019369//arachidonic acid metabolic process;GO:0043651//linoleic acid metabolic process	K07425//alkane 1-monooxygenase [EC:1.14.15.3];K17687//alkane 1-monooxygenase [EC:1.14.15.3]	XP_021055385.1//cytochrome P450 4A14 isoform X2 [Mus pahari]
109222	Rarres1	1411	1607.75	410.367	-1.97005	1.41027e-05	Down	2.08356e-07	GO:0070062//extracellular exosome	NA	NA	NA	BAC36780.1//unnamed protein product, partial [Mus musculus]
18933	Prrx1	4919	119.477	31.2315	-1.93567	0.00692241	Down	0.000324144	GO:0005634//nucleus;GO:0005730//nucleolus	GO:0071837//HMG box domain binding;GO:0000978//RNA polymerase II proximal promoter sequence-specific DNA binding;GO:0003677//DNA binding;GO:0001105//RNA polymerase II transcription coactivator activity;GO:0043565//sequence-specific DNA binding;GO:0001078//transcriptional repressor activity, RNA polymerase II proximal promoter sequence-specific DNA binding	GO:0006355//regulation of transcription, DNA-templated;GO:0051216//cartilage development;GO:0000122//negative regulation of transcription from RNA polymerase II promoter;GO:0042472//inner ear morphogenesis;GO:0042474//middle ear morphogenesis;GO:0060021//palate development;GO:0002053//positive regulation of mesenchymal cell proliferation;GO:0030326//embryonic limb morphogenesis;GO:0048664//neuron…	K09329//paired mesoderm homeobox protein	XP_015441751.1//PREDICTED: paired mesoderm homeobox protein 1 isoform X2 [Pteropus alecto];XP_010593358.1//PREDICTED: LOW QUALITY PROTEIN: paired mesoderm homeobox protein 1 [Loxodonta africana]
52679	E2f7	5476	134.802	35.3399	-1.93147	0.000958117	Down	2.82522e-05	GO:0005634//nucleus;GO:0005667//transcription factor complex;GO:0016607//nuclear speck	GO:0003714//transcription corepressor activity;GO:0000977//RNA polymerase II regulatory region sequence-specific DNA binding;GO:0042802//identical protein binding;GO:0003700//DNA binding transcription factor activity;GO:0001227//transcriptional repressor activity, RNA polymerase II transcription regulatory region sequence-specific DNA binding;GO:0001047//core promoter binding	GO:0030330//DNA damage response, signal transduction by p53 class mediator;GO:0070365//hepatocyte differentiation;GO:0006355//regulation of transcription, DNA-templated;GO:0060718//chorionic trophoblast cell differentiation;GO:0006351//transcription, DNA-templated;GO:0001890//placenta development;GO:0060707//trophoblast giant cell differentiation;GO:2000134//negative regulation of G1/S transition…	K09391//transcription factor E2F7/8	NP_848724.2//transcription factor E2F7 [Mus musculus]
20509	Slc19a1	2260	514.265	135.391	-1.92538	2.65439e-13	Down	3.88922e-16	GO:0016323//basolateral plasma membrane;GO:0005887//integral component of plasma membrane;GO:0016324//apical plasma membrane	GO:0005542//folic acid binding;GO:0015350//methotrexate transmembrane transporter activity;GO:0008517//folic acid transmembrane transporter activity;GO:0008518//reduced folate carrier activity	GO:0015884//folic acid transport;GO:0098838//reduced folate transmembrane transport;GO:0051958//methotrexate transport	K14609//solute carrier family 19 (folate transporter), member 1	NP_112473.1//folate transporter 1 [Mus musculus]
57248	Ly6i	878	27.9329	7.42437	-1.91162	0.0447964	Down	0.00348417	GO:0005886//plasma membrane;GO:0031225//anchored component of membrane	NA	NA	K06846//lymphocyte antigen 6 complex locus protein D/E/G6/H	NP_065244.2//lymphocyte antigen 6I precursor [Mus musculus]
17436	Me1	3257	8550.08	2294.34	-1.89786	3.4225e-16	Down	3.13415e-19	GO:0005739//mitochondrion	GO:0004473//malate dehydrogenase (decarboxylating) (NADP+) activity;GO:0004471//malate dehydrogenase (decarboxylating) (NAD+) activity;GO:0051287//NAD binding;GO:0030145//manganese ion binding	GO:1902031//regulation of NADP metabolic process;GO:0051262//protein tetramerization;GO:0006108//malate metabolic process	K00029//malate dehydrogenase (oxaloacetate-decarboxylating)(NADP+) [EC:1.1.1.40]	AAB01380.1//NADP-dependent malic enzyme [Homo sapiens];XP_015857775.1//PREDICTED: NADP-dependent malic enzyme [Peromyscus maniculatus bairdii]
76920	Arrdc5	1163	25.5995	6.87176	-1.89736	0.0271292	Down	0.00182769	NA	NA	NA	K09291//nucleoprotein TPR	XP_006982313.2//PREDICTED: arrestin domain-containing protein 5 [Peromyscus maniculatus bairdii]
56554	Raet1a	1287	279.147	75.642	-1.88377	0.00537845	Down	0.000232249	GO:0031362//anchored component of external side of plasma membrane;GO:0009897//external side of plasma membrane;GO:0016021//integral component of membrane;GO:0046658//anchored component of plasma membrane;GO:0005886//plasma membrane	GO:0046703//natural killer cell lectin-like receptor binding	GO:0002839//positive regulation of immune response to tumor cell;GO:0001913//T cell mediated cytotoxicity;GO:0043032//positive regulation of macrophage activation;GO:0042267//natural killer cell mediated cytotoxicity;GO:0071222//cellular response to lipopolysaccharide;GO:0071360//cellular response to exogenous dsRNA;GO:0042742//defense response to bacterium;GO:0042271//susceptibility to natural k…	K07987//retinoic acid early transcript 1	NP_064414.1//retinoic acid early-inducible protein 1-delta precursor [Mus musculus]
13897	Ces1e	2073	503.782	138.137	-1.8667	1.50329e-05	Down	2.23015e-07	NA	GO:0016787//hydrolase activity	NA	K01044//carboxylesterase 1 [EC:3.1.1.1]	XP_005079198.1//carboxylesterase 1E isoform X2 [Mesocricetus auratus]
170439	Elovl6	5951	4392.02	1205.42	-1.86534	4.06503e-09	Down	2.20872e-11	GO:0005783//endoplasmic reticulum;GO:0030176//integral component of endoplasmic reticulum membrane;GO:0016021//integral component of membrane;GO:0005789//endoplasmic reticulum membrane	GO:0009922//fatty acid elongase activity;GO:0102336//3-oxo-arachidoyl-CoA synthase activity;GO:0102756//very-long-chain 3-ketoacyl-CoA synthase activity;GO:0102337//3-oxo-cerotoyl-CoA synthase activity;GO:0016747//transferase activity, transferring acyl groups other than amino-acyl groups;GO:0102338//3-oxo-lignoceronyl-CoA synthase activity	GO:0019367//fatty acid elongation, saturated fatty acid;GO:0030497//fatty acid elongation;GO:0006636//unsaturated fatty acid biosynthetic process;GO:0042759//long-chain fatty acid biosynthetic process;GO:0034626//fatty acid elongation, polyunsaturated fatty acid;GO:0030148//sphingolipid biosynthetic process;GO:0035338//long-chain fatty-acyl-CoA biosynthetic process;GO:0042761//very long-chain fat…	K10203//elongation of very long chain fatty acids protein 6 [EC:2.3.1.199]	NP_599210.1//elongation of very long chain fatty acids protein 6 [Rattus norvegicus]
11808	Apoa4	1666	44013	12095.3	-1.86348	1.86541e-09	Down	9.22454e-12	GO:0031012//extracellular matrix;GO:0070062//extracellular exosome;GO:0005615//extracellular space;GO:0072562//blood microparticle;GO:0009986//cell surface;GO:0034364//high-density lipoprotein particle;GO:0042627//chylomicron;GO:0005829//cytosol;GO:0034361//very-low-density lipoprotein particle;GO:0005576//extracellular region	GO:0008289//lipid binding;GO:0016209//antioxidant activity;GO:0060228//phosphatidylcholine-sterol O-acyltransferase activator activity;GO:0031210//phosphatidylcholine binding;GO:0005507//copper ion binding;GO:0015485//cholesterol binding;GO:0017127//cholesterol transporter activity;GO:0042803//protein homodimerization activity	GO:0019433//triglyceride catabolic process;GO:0010898//positive regulation of triglyceride catabolic process;GO:0046470//phosphatidylcholine metabolic process;GO:0007159//leukocyte cell-cell adhesion;GO:0008203//cholesterol metabolic process;GO:0006869//lipid transport;GO:0033344//cholesterol efflux;GO:0034372//very-low-density lipoprotein particle remodeling;GO:0070328//triglyceride homeostasis;…	K08760//apolipoprotein A-IV	AAA37216.1//apolipoprotein A-IV [Mus musculus castaneus]
18770	Pklr	2661	27016.8	7437.7	-1.86093	3.7533e-07	Down	3.50583e-09	NA	NA	NA	K12406//pyruvate kinase isozymes R/L [EC:2.7.1.40]	BAA02515.1//pyruvate kinase L [Homo sapiens];XP_008852362.1//PREDICTED: pyruvate kinase PKLR [Nannospalax galili]
11549	Adra1a	4118	55.9385	15.4064	-1.86031	0.00103849	Down	3.12562e-05	GO:0030315//T-tubule;GO:0016020//membrane;GO:0005634//nucleus;GO:0031965//nuclear membrane;GO:0005737//cytoplasm;GO:0005901//caveola;GO:0030018//Z disc;GO:0005887//integral component of plasma membrane;GO:0016021//integral component of membrane;GO:0005886//plasma membrane	GO:0046982//protein heterodimerization activity;GO:0004937//alpha1-adrenergic receptor activity	GO:0007200//phospholipase C-activating G-protein coupled receptor signaling pathway;GO:0060073//micturition;GO:0019229//regulation of vasoconstriction;GO:0007512//adult heart development;GO:0016049//cell growth;GO:0045907//positive regulation of vasoconstriction;GO:0090037//positive regulation of protein kinase C signaling;GO:0001996//positive regulation of heart rate by epinephrine-norepinephrin…	K04135//adrenergic receptor alpha-1A	NP_001258688.1//alpha-1A adrenergic receptor isoform 2 [Mus musculus];NP_038489.2//alpha-1A adrenergic receptor isoform 1 [Mus musculus];NP_001258690.1//alpha-1A adrenergic receptor isoform 3 [Mus musculus]
100503386	Tpbgl	3037	1209.2	333.293	-1.85918	3.00874e-31	Down	3.67368e-35	GO:0016021//integral component of membrane	NA	NA	K13023//carboxypeptidase N regulatory subunit;K06839//slit 2	NP_001182458.1//trophoblast glycoprotein-like precursor [Mus musculus]
20454	St3gal5	2241	9347.8	2597.43	-1.84754	9.75158e-06	Down	1.36332e-07	GO:0005794//Golgi apparatus;GO:0016021//integral component of membrane	GO:0008373//sialyltransferase activity	GO:0006486//protein glycosylation	K03370//lactosylceramide alpha-2,3-sialyltransferase (sialyltransferase 9) [EC:2.4.99.9]	XP_006236738.1//PREDICTED: lactosylceramide alpha-2,3-sialyltransferase isoform X1 [Rattus norvegicus]
104158	Ces1d	1966	3087.39	858.178	-1.84704	8.92721e-11	Down	2.74941e-13	NA	NA	NA	K01044//carboxylesterase 1 [EC:3.1.1.1]	BAA84996.1//brain carboxylesterase hBr3 [Homo sapiens]
20860	Sult1e1	1260	11445	3193.3	-1.8416	5.92963e-09	Down	3.43904e-11	NA	GO:0008146//sulfotransferase activity	NA	K01016//estrone sulfotransferase [EC:2.8.2.4]	NP_075624.2//estrogen sulfotransferase, testis isoform [Mus musculus]
12021	Bard1	5448	37.3714	10.433	-1.84078	0.011426	Down	0.000606179	GO:0005634//nucleus;GO:0016607//nuclear speck;GO:0031436//BRCA1-BARD1 complex;GO:0036464//cytoplasmic ribonucleoprotein granule;GO:0005737//cytoplasm;GO:0070531//BRCA1-A complex	GO:0003723//RNA binding;GO:0046872//metal ion binding;GO:0046982//protein heterodimerization activity;GO:0042803//protein homodimerization activity;GO:0004842//ubiquitin-protein transferase activity	GO:0042325//regulation of phosphorylation;GO:0043065//positive regulation of apoptotic process;GO:0006281//DNA repair;GO:0043066//negative regulation of apoptotic process;GO:0046826//negative regulation of protein export from nucleus;GO:0085020//protein K6-linked ubiquitination	K10683//BRCA1-associated RING domain protein 1	EDL00259.1//BRCA1 associated RING domain 1, isoform CRA_a, partial [Mus musculus]
230163	Aldob	1993	390921	111107	-1.81492	9.71384e-13	Down	1.77909e-15	GO:0070062//extracellular exosome;GO:0034451//centriolar satellite	GO:0061609//fructose-1-phosphate aldolase activity;GO:0070061//fructose binding;GO:0042802//identical protein binding;GO:0004332//fructose-bisphosphate aldolase activity;GO:0008092//cytoskeletal protein binding;GO:0051117//ATPase binding	GO:0032781//positive regulation of ATPase activity;GO:0006000//fructose metabolic process;GO:0006096//glycolytic process;GO:0070072//vacuolar proton-transporting V-type ATPase complex assembly;GO:0006116//NADH oxidation;GO:0030388//fructose 1,6-bisphosphate metabolic process	K01623//fructose-bisphosphate aldolase, class I [EC:4.1.2.13]	XP_007197148.1//PREDICTED: fructose-bisphosphate aldolase B [Balaenoptera acutorostrata scammoni]
11835	Ar	2999	42.4989	12.2905	-1.78989	0.0102592	Down	0.000526111	GO:0005634//nucleus;GO:0016607//nuclear speck;GO:0000790//nuclear chromatin;GO:0005737//cytoplasm	GO:0004882//androgen receptor activity;GO:0005497//androgen binding;GO:0051117//ATPase binding;GO:0008013//beta-catenin binding	GO:0048645//animal organ formation;GO:0060520//activation of prostate induction by androgen receptor signaling pathway;GO:0009987//cellular process;GO:0030521//androgen receptor signaling pathway	K08557//androgen receptor	NP_038504.1//androgen receptor [Mus musculus]
18407	Orm3	773	618.148	179.472	-1.7842	5.61812e-06	Down	7.20272e-08	GO:0005615//extracellular space	NA	GO:0006810//transport;GO:0002682//regulation of immune system process	K17308//alpha-1-acid glycoprotein 1	NP_038651.2//alpha-1-acid glycoprotein 3 precursor [Mus musculus]
112422	Zfp979	2576	32.557	9.4556	-1.78373	0.00574154	Down	0.000252726	GO:0005634//nucleus;GO:0005622//intracellular	GO:0046872//metal ion binding;GO:0003700//DNA binding transcription factor activity;GO:0003676//nucleic acid binding	GO:0002244//hematopoietic progenitor cell differentiation;GO:0006355//regulation of transcription, DNA-templated	K09228//KRAB domain-containing zinc finger protein	NP_001096628.2//uncharacterized protein LOC100041379 [Mus musculus]
100043387	Gm14305	1621	85.7463	25.1465	-1.76972	0.00115367	Down	3.54976e-05	NA	NA	NA	K09228//KRAB domain-containing zinc finger protein	CAM27169.1//novel KRAB box and zinc finger, C2H2 type domain containing protein [Mus musculus]
13098	Cyp2c39	1857	13608.4	4021.2	-1.7588	3.80434e-06	Down	4.66496e-08	GO:0031090//organelle membrane;GO:0005789//endoplasmic reticulum membrane	GO:0008395//steroid hydroxylase activity;GO:0020037//heme binding;GO:0034875//caffeine oxidase activity;GO:0005506//iron ion binding;GO:0070330//aromatase activity;GO:0004497//monooxygenase activity;GO:0101020//estrogen 16-alpha-hydroxylase activity;GO:0008392//arachidonic acid epoxygenase activity	GO:0019373//epoxygenase P450 pathway	K07413//cytochrome P450 family 2 subfamily C [EC:1.14.14.1]	XP_021010485.1//cytochrome P450 2C38 [Mus caroli]
234564	Ces1f	1925	504.909	150.772	-1.74365	4.89835e-05	Down	8.88162e-07	GO:0005788//endoplasmic reticulum lumen	GO:0052689//carboxylic ester hydrolase activity	NA	K01044//carboxylesterase 1 [EC:3.1.1.1]	BAB60697.1//carboxylesterase RL1 [Rattus norvegicus]
75985	Rab30	2007	205.436	62.0299	-1.72766	0.011329	Down	0.000595778	GO:0031985//Golgi cisterna;GO:0005802//trans-Golgi network;GO:0005801//cis-Golgi network	GO:0005525//GTP binding;GO:0003924//GTPase activity	GO:0007030//Golgi organization	K07917//Ras-related protein Rab-30	XP_011794282.1//PREDICTED: ras-related protein Rab-30 [Colobus angolensis palliatus]
20135	Rrm2	2199	540.42	163.622	-1.72371	1.48665e-09	Down	6.93219e-12	GO:0005829//cytosol;GO:0005971//ribonucleoside-diphosphate reductase complex	GO:0004748//ribonucleoside-diphosphate reductase activity, thioredoxin disulfide as acceptor;GO:0008199//ferric iron binding;GO:0042803//protein homodimerization activity	GO:0009263//deoxyribonucleotide biosynthetic process;GO:0006260//DNA replication;GO:0009262//deoxyribonucleotide metabolic process;GO:0051290//protein heterotetramerization;GO:0051259//protein oligomerization	K10808//ribonucleoside-diphosphate reductase subunit M2 [EC:1.17.4.1]	EDL36990.1//ribonucleotide reductase M2, partial [Mus musculus]
70967	Eva1c	1998	33.465	10.2543	-1.70642	0.0446431	Down	0.00346679	GO:0016021//integral component of membrane;GO:0005576//extracellular region;GO:0005886//plasma membrane	GO:0030246//carbohydrate binding;GO:0008201//heparin binding	NA	K04593//latrophilin 2;K00111//glycerol-3-phosphate dehydrogenase [EC:1.1.5.3];K01099//inositol polyphosphate 5-phosphatase INPP5B/F [EC:3.1.3.36];K08451//G protein-coupled receptor 64;K17253//lactadherin	NP_001186139.1//protein eva-1 homolog C isoform 1 precursor [Mus musculus];NP_081903.1//protein eva-1 homolog C isoform 2 [Mus musculus]
69121	Chrdl2	1478	107.317	32.9926	-1.70166	0.00170396	Down	5.77348e-05	GO:0005615//extracellular space	NA	GO:0030514//negative regulation of BMP signaling pathway;GO:0030154//cell differentiation;GO:0051216//cartilage development;GO:0001503//ossification	K17280//chordin-like protein 2	NP_598470.3//chordin-like protein 2 isoform 2 precursor [Mus musculus];NP_001278249.1//chordin-like protein 2 isoform 1 [Mus musculus]
14104	Fasn	9938	22845.8	7037.52	-1.69879	0.0445555	Down	0.00345455	GO:0016020//membrane;GO:0070062//extracellular exosome;GO:0042587//glycogen granule;GO:0042470//melanosome;GO:0005737//cytoplasm;GO:0005829//cytosol;GO:0005794//Golgi apparatus;GO:0005739//mitochondrion;GO:0005886//plasma membrane	GO:0003723//RNA binding;GO:0031177//phosphopantetheine binding;GO:0004320//oleoyl-[acyl-carrier-protein] hydrolase activity;GO:0004313//[acyl-carrier-protein] S-acetyltransferase activity;GO:0016296//palmitoyl-[acyl-carrier-protein] hydrolase activity;GO:0004319//enoyl-[acyl-carrier-protein] reductase (NADPH, B-specific) activity;GO:0047451//3-hydroxyoctanoyl-[acyl-carrier-protein] dehydratase ac…	GO:0008611//ether lipid biosynthetic process;GO:0001649//osteoblast differentiation;GO:0046949//fatty-acyl-CoA biosynthetic process;GO:0030223//neutrophil differentiation;GO:0006084//acetyl-CoA metabolic process;GO:0071353//cellular response to interleukin-4;GO:0006633//fatty acid biosynthetic process;GO:0008610//lipid biosynthetic process;GO:0030879//mammary gland development;GO:0030224//monocyt…	K00665//fatty acid synthase, animal type [EC:2.3.1.85]	EDL34808.1//fatty acid synthase, isoform CRA_a, partial [Mus musculus]
17133	Maff	1890	166.489	51.415	-1.69516	0.00210193	Down	7.40512e-05	GO:0005634//nucleus	GO:0003677//DNA binding;GO:0003700//DNA binding transcription factor activity	GO:0006351//transcription, DNA-templated	K09037//transcription factor MAFF/G/K	XP_006242091.2//PREDICTED: transcription factor MafF isoform X1 [Rattus norvegicus];NP_001291760.1//transcription factor MafF isoform 2 [Mus musculus];NP_001291761.1//transcription factor MafF isoform 3 [Mus musculus]
268527	Greb1	7868	69.1107	21.6235	-1.67631	0.0326416	Down	0.00233354	GO:0070062//extracellular exosome;GO:0016021//integral component of membrane	NA	NA	K21125//mucin-5AC	XP_006515162.1//PREDICTED: protein GREB1 isoform X2 [Mus musculus];NP_001239000.1//protein GREB1 isoform 2 [Mus musculus]
74407	Ttc25	2818	90.1093	28.1948	-1.67625	3.4359e-05	Down	5.93626e-07	GO:0005856//cytoskeleton;GO:0005929//cilium;GO:0005737//cytoplasm	NA	NA	K02145//V-type H+-transporting ATPase subunit A [EC:3.6.3.14];K09553//stress-induced-phosphoprotein 1;K19607//X-linked retinitis pigmentosa GTPase regulator	NP_083194.2//tetratricopeptide repeat protein 25 [Mus musculus]
67117	Dynlt3	2153	1209.52	379.989	-1.6704	7.52817e-13	Down	1.28687e-15	GO:0061673//mitotic spindle astral microtubule;GO:0005634//nucleus;GO:0005868//cytoplasmic dynein complex;GO:0000776//kinetochore;GO:0000777//condensed chromosome kinetochore	GO:0003774//motor activity;GO:0042802//identical protein binding	GO:0006810//transport;GO:0007346//regulation of mitotic cell cycle;GO:0051301//cell division;GO:0045931//positive regulation of mitotic cell cycle;GO:0007049//cell cycle	K10420//dynein light chain Tctex-type 1	XP_005080633.2//dynein light chain Tctex-type 3 isoform X1 [Mesocricetus auratus]
14377	G6pc	2245	16714.8	5260.7	-1.6678	2.86222e-11	Down	7.51377e-14	GO:0043231//intracellular membrane-bounded organelle;GO:0005783//endoplasmic reticulum;GO:0030176//integral component of endoplasmic reticulum membrane;GO:0016021//integral component of membrane	GO:0042301//phosphate ion binding;GO:0004346//glucose-6-phosphatase activity;GO:0016773//phosphotransferase activity, alcohol group as acceptor	GO:0010468//regulation of gene expression;GO:0005980//glycogen catabolic process;GO:0051156//glucose 6-phosphate metabolic process;GO:0006641//triglyceride metabolic process;GO:0006094//gluconeogenesis;GO:0032094//response to food;GO:0046838//phosphorylated carbohydrate dephosphorylation;GO:0035264//multicellular organism growth;GO:0042593//glucose homeostasis;GO:0008202//steroid metabolic proces…	K01084//glucose-6-phosphatase [EC:3.1.3.9]	NP_032087.2//glucose-6-phosphatase [Mus musculus]
66979	Pole4	1694	686.974	218.066	-1.65549	8.65721e-10	Down	3.59396e-12	GO:0005671//Ada2/Gcn5/Ada3 transcription activator complex;GO:0008622//epsilon DNA polymerase complex	GO:0003887//DNA-directed DNA polymerase activity;GO:0003677//DNA binding;GO:0046982//protein heterodimerization activity	GO:0043966//histone H3 acetylation	K03506//DNA polymerase epsilon subunit 4 [EC:2.7.7.7]	NP_080158.1//DNA polymerase epsilon subunit 4 [Mus musculus]
68523	Ciao2b	680	177.224	56.9037	-1.63898	8.75963e-08	Down	6.6847e-10	GO:0005634//nucleus;GO:0005654//nucleoplasm;GO:0071817//MMXD complex;GO:0005829//cytosol;GO:0005819//spindle;GO:0005737//cytoplasm;GO:0097361//CIA complex	NA	GO:0016226//iron-sulfur cluster assembly;GO:0007059//chromosome segregation	K03927//carboxylesterase 2 [EC:3.1.1.1 3.1.1.84 3.1.1.56];K11660//metastasis-associated protein MTA	NP_081029.1//mitotic spindle-associated MMXD complex subunit MIP18 [Mus musculus]
71954	Suds3	2407	1534.12	494.114	-1.6345	1.41297e-28	Down	3.45047e-32	GO:0005634//nucleus;GO:0016604//nuclear body;GO:0005829//cytosol;GO:0016580//Sin3 complex	GO:0004407//histone deacetylase activity;GO:0042802//identical protein binding;GO:0042826//histone deacetylase binding;GO:0042803//protein homodimerization activity;GO:0019899//enzyme binding	GO:0045892//negative regulation of transcription, DNA-templated;GO:0000122//negative regulation of transcription from RNA polymerase II promoter;GO:0021762//substantia nigra development;GO:0043065//positive regulation of apoptotic process;GO:0006351//transcription, DNA-templated;GO:0016575//histone deacetylation;GO:0006915//apoptotic process	K19201//Sin3 histone deacetylase corepressor complex component SDS3	NP_001116138.1//sin3 histone deacetylase corepressor complex component SDS3 isoform b [Mus musculus];XP_019609532.1//PREDICTED: sin3 histone deacetylase corepressor complex component SDS3 isoform X1 [Rhinolophus sinicus]
252838	Tox	2852	97.9396	31.6268	-1.63074	0.027887	Down	0.00189488	GO:0005634//nucleus	GO:0003677//DNA binding	NA	K10802//high mobility group protein B1;K09272//structure-specific recognition protein 1;K18808//toll-like receptor 13	NP_663757.3//thymocyte selection-associated high mobility group box protein TOX [Mus musculus]
15357	Hmgcr	4444	1299.75	421.134	-1.62588	9.42507e-09	Down	5.86909e-11	GO:0005783//endoplasmic reticulum;GO:0016021//integral component of membrane;GO:0005789//endoplasmic reticulum membrane;GO:0005778//peroxisomal membrane	GO:0050661//NADP binding;GO:0004420//hydroxymethylglutaryl-CoA reductase (NADPH) activity;GO:0051721//protein phosphatase 2A binding;GO:0042803//protein homodimerization activity;GO:0070402//NADPH binding;GO:0042282//hydroxymethylglutaryl-CoA reductase activity;GO:0050662//coenzyme binding	GO:0008542//visual learning;GO:0043407//negative regulation of MAP kinase activity;GO:0015936//coenzyme A metabolic process;GO:0045471//response to ethanol;GO:0097756//negative regulation of blood vessel diameter;GO:0010664//negative regulation of striated muscle cell apoptotic process;GO:0045445//myoblast differentiation;GO:0007584//response to nutrient;GO:0010666//positive regulation of cardiac…	K00021//hydroxymethylglutaryl-CoA reductase (NADPH) [EC:1.1.1.34]	XP_006517593.1//PREDICTED: 3-hydroxy-3-methylglutaryl-coenzyme A reductase isoform X1 [Mus musculus]
394430	Ugt1a10	3242	103.793	33.8697	-1.61565	0.000778165	Down	2.24233e-05	GO:0043231//intracellular membrane-bounded organelle;GO:0070062//extracellular exosome;GO:0005783//endoplasmic reticulum;GO:0016021//integral component of membrane;GO:0005789//endoplasmic reticulum membrane	GO:0046982//protein heterodimerization activity;GO:0015020//glucuronosyltransferase activity;GO:0042803//protein homodimerization activity;GO:0005080//protein kinase C binding;GO:0008144//drug binding;GO:0004857//enzyme inhibitor activity;GO:0005504//fatty acid binding;GO:0019899//enzyme binding;GO:0005496//steroid binding	GO:0008152//metabolic process;GO:0052697//xenobiotic glucuronidation;GO:0052696//flavonoid glucuronidation	K00699//glucuronosyltransferase [EC:2.4.1.17]	NP_964003.2//UDP glycosyltransferase 1 family, polypeptide A10 precursor [Mus musculus]
380660	Acss3	2161	425.911	140.145	-1.60363	8.25604e-06	Down	1.13407e-07	GO:0005739//mitochondrion	GO:0003987//acetate-CoA ligase activity;GO:0005524//ATP binding;GO:0003824//catalytic activity	GO:0008152//metabolic process	K01908//propionyl-CoA synthetase [EC:6.2.1.17]	NP_001136276.1//acyl-CoA synthetase short-chain family member 3, mitochondrial isoform 1 [Mus musculus];NP_941038.2//acyl-CoA synthetase short-chain family member 3, mitochondrial isoform 2 [Mus musculus]
20348	Sema3c	4956	614.648	203.024	-1.59811	0.000262131	Down	6.1772e-06	GO:0070062//extracellular exosome;GO:0005615//extracellular space	GO:0030215//semaphorin receptor binding;GO:0038191//neuropilin binding	GO:0003148//outflow tract septum morphogenesis;GO:0050919//negative chemotaxis;GO:0060666//dichotomous subdivision of terminal units involved in salivary gland branching;GO:0009791//post-embryonic development;GO:0001756//somitogenesis;GO:0021915//neural tube development;GO:0007411//axon guidance;GO:0140074//cardiac endothelial to mesenchymal transition;GO:0003215//cardiac right ventricle morphoge…	K06840//semaphorin 3	XP_008760868.1//PREDICTED: semaphorin-3C isoform X2 [Rattus norvegicus]
74645	Tent5c	2054	89.4895	29.5936	-1.59644	0.000739033	Down	2.11604e-05	NA	GO:0016779//nucleotidyltransferase activity	NA	K05742//solute carrier family 9 (sodium/hydrogen exchanger), member 1	AAH46309.1//Fam46c protein, partial [Mus musculus]
213469	Lgi3	3197	32.6153	10.8909	-1.58242	0.0192029	Down	0.00117469	NA	NA	NA	K19999//leucine-rich repeat LGI family member 3	XP_003984762.1//PREDICTED: leucine-rich repeat LGI family member 3 isoform X1 [Felis catus]
212996	Galnt17	4196	26.3574	8.89299	-1.56747	0.0390201	Down	0.00293008	GO:0016021//integral component of membrane;GO:0000139//Golgi membrane	GO:0030246//carbohydrate binding;GO:0016757//transferase activity, transferring glycosyl groups	GO:0006486//protein glycosylation	K00710//polypeptide N-acetylgalactosaminyltransferase [EC:2.4.1.41]	XP_003416684.2//PREDICTED: LOW QUALITY PROTEIN: putative polypeptide N-acetylgalactosaminyltransferase-like protein 3 [Loxodonta africana]
21848	Trim24	6000	538.765	183.727	-1.5521	0.000913825	Down	2.68408e-05	GO:0005634//nucleus;GO:0005654//nucleoplasm;GO:0005622//intracellular;GO:0005719//nuclear euchromatin;GO:0005726//perichromatin fibrils;GO:0005737//cytoplasm	GO:0061630//ubiquitin protein ligase activity;GO:0002039//p53 binding;GO:0070577//lysine-acetylated histone binding;GO:0034056//estrogen response element binding;GO:0004842//ubiquitin-protein transferase activity;GO:0016922//ligand-dependent nuclear receptor binding;GO:0003713//transcription coactivator activity;GO:0003682//chromatin binding;GO:0004672//protein kinase activity;GO:0008270//zinc io…	GO:0045892//negative regulation of transcription, DNA-templated;GO:0016567//protein ubiquitination;GO:0006468//protein phosphorylation;GO:0006351//transcription, DNA-templated;GO:0030163//protein catabolic process;GO:0010628//positive regulation of gene expression;GO:0055074//calcium ion homeostasis;GO:0046777//protein autophosphorylation;GO:0045893//positive regulation of transcription, DNA-temp…	K08881//tripartite motif-containing protein 24 [EC:2.3.2.27]	NP_001258993.1//transcription intermediary factor 1-alpha isoform 2 [Mus musculus];NP_001259005.1//transcription intermediary factor 1-alpha isoform 3 [Mus musculus];NP_659542.3//transcription intermediary factor 1-alpha isoform 1 [Mus musculus]
18113	Nnmt	954	3121	1075.8	-1.5366	7.79863e-05	Down	1.49189e-06	GO:0005829//cytosol	GO:0008168//methyltransferase activity;GO:0008112//nicotinamide N-methyltransferase activity;GO:0098603//selenol Se-methyltransferase activity	GO:0031100//animal organ regeneration;GO:0042493//response to drug;GO:0010243//response to organonitrogen compound;GO:0001887//selenium compound metabolic process;GO:0032259//methylation	K00541//nicotinamide N-methyltransferase [EC:2.1.1.1]	NP_035054.1//nicotinamide N-methyltransferase isoform 1 [Mus musculus]
213068	Tmem71	2931	116.279	40.6047	-1.51787	0.000424409	Down	1.08305e-05	GO:0016021//integral component of membrane;GO:0005739//mitochondrion	NA	NA	K19753//protein TilB	NP_766102.1//transmembrane protein 71 [Mus musculus]
232430	Crebl2	2536	626.224	220.473	-1.50608	6.38164e-19	Down	3.1168e-22	GO:0005634//nucleus	GO:0003677//DNA binding;GO:0003700//DNA binding transcription factor activity	GO:0030154//cell differentiation;GO:0045600//positive regulation of fat cell differentiation;GO:0006351//transcription, DNA-templated;GO:0045893//positive regulation of transcription, DNA-templated;GO:0046326//positive regulation of glucose import;GO:0033138//positive regulation of peptidyl-serine phosphorylation;GO:0050821//protein stabilization;GO:0046889//positive regulation of lipid biosynthe…	NA	XP_011239631.1//PREDICTED: cAMP-responsive element-binding protein-like 2 isoform X1 [Mus musculus]
14376	Ganab	3942	3055.33	1076.1	-1.50552	1.14648e-26	Down	3.49965e-30	NA	GO:0004553//hydrolase activity, hydrolyzing O-glycosyl compounds;GO:0030246//carbohydrate binding	GO:0005975//carbohydrate metabolic process	K05546//alpha 1,3-glucosidase [EC:3.2.1.84]	XP_006231039.1//PREDICTED: neutral alpha-glucosidase AB isoform X2 [Rattus norvegicus];XP_006231038.1//PREDICTED: neutral alpha-glucosidase AB isoform X1 [Rattus norvegicus]
13097	Cyp2c38	2869	3993.39	1409.86	-1.50206	0.00081213	Down	2.35012e-05	GO:0031090//organelle membrane;GO:0005789//endoplasmic reticulum membrane	GO:0008395//steroid hydroxylase activity;GO:0020037//heme binding;GO:0005506//iron ion binding;GO:0101020//estrogen 16-alpha-hydroxylase activity;GO:0008392//arachidonic acid epoxygenase activity;GO:0034875//caffeine oxidase activity;GO:0016705//oxidoreductase activity, acting on paired donors, with incorporation or reduction of molecular oxygen;GO:0070330//aromatase activity;GO:0004497//monooxyg…	GO:0019373//epoxygenase P450 pathway	K07413//cytochrome P450 family 2 subfamily C [EC:1.14.14.1]	AAH57911.1//Cyp2c39 protein, partial [Mus musculus]
68332	Sdhaf1	987	302.227	107.861	-1.48646	1.5864e-07	Down	1.2906e-09	GO:0005759//mitochondrial matrix;GO:0005739//mitochondrion	NA	GO:0034553//mitochondrial respiratory chain complex II assembly	K18167//succinate dehydrogenase assembly factor 1	BAE25291.1//unnamed protein product [Mus musculus]
226178	Wbp1l	3911	7190.96	2571.24	-1.48372	5.12052e-19	Down	2.18826e-22	GO:0016021//integral component of membrane	NA	NA	K21958//extracellular serine/threonine protein kinase FAM20C [EC:2.7.11.1];K22154//dapper	NP_666211.3//WW domain binding protein 1-like isoform 2 precursor [Mus musculus]
102866	Pls3	3140	1432.64	513.342	-1.48069	1.20001e-16	Down	8.79128e-20	NA	NA	NA	K17336//plastin-3	XP_013005633.1//PREDICTED: LOW QUALITY PROTEIN: plastin-3 [Cavia porcellus]
107476	Acaca	9054	6743.86	2417.39	-1.48012	8.12343e-09	Down	4.95936e-11	NA	NA	NA	K11262//acetyl-CoA carboxylase / biotin carboxylase 1 [EC:6.4.1.2 6.3.4.14]	XP_006154503.1//PREDICTED: acetyl-CoA carboxylase 1 [Tupaia chinensis]
20519	Slc22a3	3501	199.303	71.5819	-1.4773	0.0092832	Down	0.000458493	GO:0005887//integral component of plasma membrane;GO:0016021//integral component of membrane	GO:0019534//toxin transmembrane transporter activity;GO:0015101//organic cation transmembrane transporter activity;GO:0008514//organic anion transmembrane transporter activity;GO:0015651//quaternary ammonium group transmembrane transporter activity;GO:0005329//dopamine transmembrane transporter activity	GO:0015695//organic cation transport;GO:0051615//histamine uptake;GO:0032098//regulation of appetite;GO:0015697//quaternary ammonium group transport;GO:0051608//histamine transport;GO:0015872//dopamine transport;GO:0015844//monoamine transport	K08200//MFS transporter, OCT family, solute carrier family 22 (organic cation transporter), member 3	NP_035525.1//solute carrier family 22 member 3 [Mus musculus]
394433	Ugt1a5	3208	1353.45	487.767	-1.47238	1.12354e-06	Down	1.15921e-08	GO:0043231//intracellular membrane-bounded organelle;GO:0005783//endoplasmic reticulum;GO:0016021//integral component of membrane	GO:0046982//protein heterodimerization activity;GO:0015020//glucuronosyltransferase activity;GO:0042803//protein homodimerization activity;GO:0019899//enzyme binding	GO:0052695//cellular glucuronidation;GO:0052697//xenobiotic glucuronidation;GO:0052696//flavonoid glucuronidation	K00699//glucuronosyltransferase [EC:2.4.1.17]	NP_964005.2//UDP glucuronosyltransferase 1 family, polypeptide A5 precursor [Mus musculus]
107770	Tm6sf2	1446	953.774	345.97	-1.463	1.19422e-06	Down	1.23942e-08	GO:0016021//integral component of membrane;GO:0033116//endoplasmic reticulum-Golgi intermediate compartment membrane;GO:0005789//endoplasmic reticulum membrane	NA	GO:0019216//regulation of lipid metabolic process	K06853//hyaluronan and proteoglycan link protein 4	EDL28777.1//transmembrane 6 superfamily member 2, isoform CRA_a, partial [Mus musculus];EDL28778.1//transmembrane 6 superfamily member 2, isoform CRA_b, partial [Mus musculus]
55983	Pdzrn3	4106	120.769	44.0679	-1.45444	0.000173625	Down	3.82653e-06	GO:0005634//nucleus;GO:0005654//nucleoplasm;GO:0005829//cytosol;GO:0031594//neuromuscular junction	GO:0061630//ubiquitin protein ligase activity;GO:0008270//zinc ion binding;GO:0004842//ubiquitin-protein transferase activity	GO:0007528//neuromuscular junction development;GO:0016567//protein ubiquitination	K15682//ligand of Numb protein X 3/4 [EC:2.3.2.27]	NP_061372.2//E3 ubiquitin-protein ligase PDZRN3 [Mus musculus]
14121	Fbp1	1479	25079.2	9166.42	-1.45206	0.000193704	Down	4.38731e-06	GO:0070062//extracellular exosome;GO:0005829//cytosol;GO:0005737//cytoplasm	GO:0046872//metal ion binding;GO:0048029//monosaccharide binding;GO:0042802//identical protein binding;GO:0016208//AMP binding;GO:0042132//fructose 1,6-bisphosphate 1-phosphatase activity	GO:0030308//negative regulation of cell growth;GO:0071286//cellular response to magnesium ion;GO:0005986//sucrose biosynthetic process;GO:0046580//negative regulation of Ras protein signal transduction;GO:0051289//protein homotetramerization;GO:0035690//cellular response to drug;GO:0006094//gluconeogenesis;GO:0006000//fructose metabolic process;GO:0006111//regulation of gluconeogenesis;GO:0032869…	K03841//fructose-1,6-bisphosphatase I [EC:3.1.3.11]	NP_062268.1//fructose-1,6-bisphosphatase 1 [Mus musculus]
72056	1810055G02Rik	1882	1518.49	555.041	-1.45197	2.53623e-05	Down	4.01028e-07	GO:0005794//Golgi apparatus;GO:0016021//integral component of membrane;GO:0005886//plasma membrane	NA	NA	K16669//protocadherin Fat 4	EDL32950.1//RIKEN cDNA 1810055G02, isoform CRA_a, partial [Mus musculus]
100705	Acacb	8497	1949.09	719.578	-1.43758	2.67683e-10	Down	9.15154e-13	NA	NA	NA	K01946//acetyl-CoA carboxylase / biotin carboxylase 2 [EC:6.4.1.2 6.3.4.14]	XP_021042297.1//acetyl-CoA carboxylase 2 [Mus pahari]
56405	Dusp14	1443	161.167	59.6989	-1.43278	0.00013844	Down	2.90741e-06	GO:0005634//nucleus;GO:0005737//cytoplasm	GO:0017017//MAP kinase tyrosine/serine/threonine phosphatase activity;GO:0003723//RNA binding;GO:0004725//protein tyrosine phosphatase activity	GO:0035335//peptidyl-tyrosine dephosphorylation	K14165//atypical dual specificity phosphatase [EC:3.1.3.16 3.1.3.48]	OBS59901.1//hypothetical protein A6R68_08969 [Neotoma lepida]
66270	Retreg1	2824	2551.28	951.683	-1.42267	0.00296297	Down	0.000113056	GO:0005783//endoplasmic reticulum;GO:0016604//nuclear body;GO:0030176//integral component of endoplasmic reticulum membrane;GO:0005794//Golgi apparatus;GO:0005801//cis-Golgi network	NA	GO:0019233//sensory perception of pain;GO:0043524//negative regulation of neuron apoptotic process;GO:0061709//reticulophagy	K12855//pre-mRNA-processing factor 6	NP_001264246.1//reticulophagy regulator 1 isoform 4 [Mus musculus];NP_079735.2//reticulophagy regulator 1 isoform 2 [Mus musculus];NP_001030023.1//reticulophagy regulator 1 isoform 1 [Mus musculus];NP_001264245.1//reticulophagy regulator 1 isoform 3 [Mus musculus]
241447	Cers6	3930	187.939	70.4096	-1.41642	0.0237964	Down	0.00154689	GO:0016020//membrane;GO:0005634//nucleus;GO:0031965//nuclear membrane;GO:0005783//endoplasmic reticulum;GO:0016021//integral component of membrane;GO:0005789//endoplasmic reticulum membrane	GO:0003677//DNA binding;GO:0050291//sphingosine N-acyltransferase activity	GO:0030148//sphingolipid biosynthetic process;GO:0046513//ceramide biosynthetic process	K04710//ceramide synthetase [EC:2.3.1.24]	NP_766444.1//ceramide synthase 6 isoform 2 [Mus musculus]
407243	Tmem189	1700	361.064	136.163	-1.40692	0.00344806	Down	0.000134723	GO:0005783//endoplasmic reticulum;GO:0016021//integral component of membrane;GO:0005789//endoplasmic reticulum membrane;GO:0005737//cytoplasm	GO:0061630//ubiquitin protein ligase activity;GO:0031625//ubiquitin protein ligase binding	NA	K20656//transmembrane protein 189	NP_663513.1//transmembrane protein 189 [Mus musculus]
19885	Rorc	2572	952.683	361.162	-1.39935	4.1616e-06	Down	5.18294e-08	GO:0005634//nucleus;GO:0005654//nucleoplasm;GO:0016604//nuclear body	GO:0003707//steroid hormone receptor activity;GO:0098531//transcription factor activity, direct ligand regulated sequence-specific DNA binding;GO:0001223//transcription coactivator binding;GO:0000978//RNA polymerase II proximal promoter sequence-specific DNA binding;GO:0003677//DNA binding;GO:0004879//nuclear receptor activity;GO:0001078//transcriptional repressor activity, RNA polymerase II prox…	GO:0048537//mucosal-associated lymphoid tissue development;GO:0033077//T cell differentiation in thymus;GO:0036315//cellular response to sterol;GO:0045893//positive regulation of transcription, DNA-templated;GO:0000122//negative regulation of transcription from RNA polymerase II promoter;GO:0019218//regulation of steroid metabolic process;GO:0048541//Peyer's patch development;GO:0010906//regulati…	K08534//RAR-related orphan receptor gamma	NP_001280663.1//nuclear receptor ROR-gamma isoform 2 [Mus musculus];NP_035411.2//nuclear receptor ROR-gamma isoform 1 [Mus musculus]
26372	Clcn6	2910	48.7459	18.5864	-1.39103	0.0386527	Down	0.00289778	GO:0005765//lysosomal membrane;GO:0010008//endosome membrane;GO:0016021//integral component of membrane	GO:0005524//ATP binding;GO:0005247//voltage-gated chloride channel activity;GO:0015297//antiporter activity	GO:0009612//response to mechanical stimulus;GO:1902476//chloride transmembrane transport	K05015//chloride channel 6	NP_036059.1//chloride transport protein 6 [Mus musculus]
67087	Ctnnbip1	2675	279.243	106.758	-1.38718	4.53538e-08	Down	3.29494e-10	NA	NA	NA	K04493//Beta-catenin-interacting protein 1 (Inhibitor of beta-catenin and Tcf-4)	XP_021016933.1//calsyntenin-1 [Mus caroli]
22418	Wnt5a	4354	63.1829	24.395	-1.37295	0.00535052	Down	0.000230614	GO:0005788//endoplasmic reticulum lumen;GO:0005615//extracellular space;GO:0009986//cell surface;GO:0005622//intracellular;GO:0005576//extracellular region;GO:0005578//proteinaceous extracellular matrix	GO:0005110//frizzled-2 binding;GO:0019904//protein domain specific binding;GO:0005125//cytokine activity;GO:1902379//chemoattractant activity involved in axon guidance;GO:0005109//frizzled binding	GO:0032148//activation of protein kinase B activity;GO:0090630//activation of GTPase activity;GO:0000187//activation of MAPK activity;GO:0008595//anterior/posterior axis specification, embryo;GO:0007257//activation of JUN kinase activity	K00444//wingless-type MMTV integration site family, member 5	XP_006252726.1//PREDICTED: protein Wnt-5a isoform X1 [Rattus norvegicus];EDL24737.1//wingless-related MMTV integration site 5A, partial [Mus musculus]
217082	Hlf	5665	1267.59	491.545	-1.36669	9.83668e-08	Down	7.62673e-10	GO:0005634//nucleus	GO:0001228//transcriptional activator activity, RNA polymerase II transcription regulatory region sequence-specific DNA binding;GO:0000977//RNA polymerase II regulatory region sequence-specific DNA binding;GO:0043565//sequence-specific DNA binding;GO:0001077//transcriptional activator activity, RNA polymerase II proximal promoter sequence-specific DNA binding	GO:0035914//skeletal muscle cell differentiation;GO:0045944//positive regulation of transcription from RNA polymerase II promoter;GO:0048511//rhythmic process	K09057//hepatic leukemia factor	NP_766151.1//hepatic leukemia factor [Mus musculus]
104112	Acly	4416	6286.99	2447.32	-1.36117	0.00157763	Down	5.18173e-05	GO:0016020//membrane;GO:0070062//extracellular exosome;GO:0005654//nucleoplasm;GO:0005737//cytoplasm;GO:0005829//cytosol;GO:0005739//mitochondrion;GO:0009346//citrate lyase complex;GO:0005886//plasma membrane	GO:0003878//ATP citrate synthase activity;GO:0016829//lyase activity;GO:0046872//metal ion binding;GO:0005524//ATP binding;GO:0048037//cofactor binding	GO:0006101//citrate metabolic process;GO:0006085//acetyl-CoA biosynthetic process;GO:0006107//oxaloacetate metabolic process;GO:0006084//acetyl-CoA metabolic process;GO:0006633//fatty acid biosynthetic process;GO:0006629//lipid metabolic process;GO:0008610//lipid biosynthetic process	K01648//ATP citrate (pro-S)-lyase [EC:2.3.3.8]	NP_001186225.1//ATP-citrate synthase isoform 1 [Mus musculus];NP_598798.1//ATP-citrate synthase isoform 2 [Mus musculus]
233005	Cyp2a22	2226	970.44	379.38	-1.35499	0.0157407	Down	0.000902811	GO:0043231//intracellular membrane-bounded organelle;GO:0031090//organelle membrane;GO:0005789//endoplasmic reticulum membrane	GO:0008395//steroid hydroxylase activity;GO:0020037//heme binding;GO:0005506//iron ion binding;GO:0070330//aromatase activity;GO:0016712//oxidoreductase activity, acting on paired donors, with incorporation or reduction of molecular oxygen, reduced flavin or flavoprotein as one donor, and incorporation of one atom of oxygen;GO:0016491//oxidoreductase activity;GO:0008392//arachidonic acid epoxygen…	GO:0009804//coumarin metabolic process;GO:0019373//epoxygenase P450 pathway	K07411//cytochrome P450 family 2 subfamily A [EC:1.14.14.1];K17685//cytochrome P450 family 2 subfamily A polypeptide 13 [EC:1.14.14.1]	NP_001094937.1//cytochrome P450, family 2, subfamily a, polypeptide 22 precursor [Mus musculus]
72881	Zdhhc4	1363	365.551	143.01	-1.35396	2.79301e-09	Down	1.46642e-11	GO:0005794//Golgi apparatus;GO:0016021//integral component of membrane	GO:0019706//protein-cysteine S-palmitoyltransferase activity	NA	K20003//palmitoyltransferase ZDHHC4 [EC:2.3.1.225]	EDL19055.1//zinc finger, DHHC domain containing 4, isoform CRA_a, partial [Mus musculus]
13074	Cyp17a1	1841	6454.87	2536.73	-1.34742	0.000335548	Down	8.09166e-06	GO:0043231//intracellular membrane-bounded organelle;GO:0016020//membrane;GO:0030424//axon;GO:0005783//endoplasmic reticulum;GO:0042995//cell projection;GO:0005739//mitochondrion;GO:0043025//neuronal cell body	GO:0016705//oxidoreductase activity, acting on paired donors, with incorporation or reduction of molecular oxygen;GO:0020037//heme binding;GO:0005506//iron ion binding;GO:0004508//steroid 17-alpha-monooxygenase activity;GO:0004497//monooxygenase activity;GO:0047442//17-alpha-hydroxyprogesterone aldolase activity	GO:0018894//dibenzo-p-dioxin metabolic process;GO:0042446//hormone biosynthetic process;GO:0021766//hippocampus development;GO:0018879//biphenyl metabolic process;GO:0071222//cellular response to lipopolysaccharide;GO:0030728//ovulation;GO:0008584//male gonad development;GO:0034698//response to gonadotropin;GO:0042493//response to drug;GO:0042448//progesterone metabolic process;GO:0009635//respon…	K00512//steroid 17alpha-monooxygenase / 17alpha-hydroxyprogesterone deacetylase [EC:1.14.14.19 1.14.14.32]	NP_031835.3//steroid 17-alpha-hydroxylase/17,20 lyase precursor [Mus musculus]
67457	Frmd8	3166	1039.8	409.5	-1.34437	1.69089e-13	Down	2.27104e-16	GO:0005856//cytoskeleton	NA	NA	K17705//Krev interaction trapped protein 1;K04461//protein phosphatase 1B [EC:3.1.3.16]	NP_080445.1//FERM domain-containing protein 8 [Mus musculus]
14751	Gpi1	2887	13569.9	5491.27	-1.3052	1.06512e-14	Down	1.30051e-17	GO:0016020//membrane;GO:0070062//extracellular exosome;GO:0060170//ciliary membrane;GO:0005654//nucleoplasm;GO:0005615//extracellular space;GO:0043209//myelin sheath;GO:0043005//neuron projection;GO:0005829//cytosol;GO:0005886//plasma membrane	GO:0004347//glucose-6-phosphate isomerase activity;GO:0008083//growth factor activity;GO:0005125//cytokine activity;GO:0048029//monosaccharide binding;GO:0031625//ubiquitin protein ligase binding;GO:0016866//intramolecular transferase activity	GO:0043154//negative regulation of cysteine-type endopeptidase activity involved in apoptotic process;GO:0043278//response to morphine;GO:0006096//glycolytic process;GO:0032570//response to progesterone;GO:0042593//glucose homeostasis;GO:0001707//mesoderm formation;GO:0061620//glycolytic process through glucose-6-phosphate;GO:0033574//response to testosterone;GO:0032355//response to estradiol;GO:…	K01810//glucose-6-phosphate isomerase [EC:5.3.1.9]	NP_032181.2//glucose-6-phosphate isomerase [Mus musculus]
64292	Ptges	3647	53.8495	21.8039	-1.30435	0.0124686	Down	0.000672148	GO:0016021//integral component of membrane;GO:0005641//nuclear envelope lumen;GO:0005737//cytoplasm;GO:0048471//perinuclear region of cytoplasm	GO:0004667//prostaglandin-D synthase activity;GO:0043295//glutathione binding;GO:0050220//prostaglandin-E synthase activity	GO:0014070//response to organic cyclic compound;GO:0034097//response to cytokine;GO:0032496//response to lipopolysaccharide;GO:0032526//response to retinoic acid;GO:0002526//acute inflammatory response;GO:0051592//response to calcium ion;GO:0006693//prostaglandin metabolic process;GO:0002544//chronic inflammatory response;GO:0001516//prostaglandin biosynthetic process;GO:0008285//negative regulat…	K15729//microsomal prostaglandin-E synthase 1 [EC:5.3.99.3]	NP_071860.1//prostaglandin E synthase [Mus musculus]
403178	Plcxd1	3413	409.935	166.317	-1.30145	0.00537845	Down	0.000232631	NA	GO:0008081//phosphoric diester hydrolase activity	GO:0006629//lipid metabolic process	K22156//protein Jade-3;K01027//3-oxoacid CoA-transferase [EC:2.8.3.5]	NP_001268741.1//PI-PLC X domain-containing protein 1 isoform 2 [Mus musculus];NP_997162.2//PI-PLC X domain-containing protein 1 isoform 1 [Mus musculus]
227731	Slc25a25	3199	1772.55	719.454	-1.30085	6.17293e-07	Down	5.99204e-09	GO:0070062//extracellular exosome;GO:0005743//mitochondrial inner membrane;GO:0016021//integral component of membrane;GO:0005739//mitochondrion	GO:0005347//ATP transmembrane transporter activity;GO:0015217//ADP transmembrane transporter activity;GO:0005509//calcium ion binding	GO:0070588//calcium ion transmembrane transport;GO:0046034//ATP metabolic process;GO:0055085//transmembrane transport;GO:0043010//camera-type eye development;GO:0014823//response to activity;GO:0032094//response to food;GO:0002021//response to dietary excess;GO:0060612//adipose tissue development;GO:0006839//mitochondrial transport;GO:0035264//multicellular organism growth;GO:0045333//cellular re…	K14684//solute carrier family 25 (mitochondrial phosphate transporter), member 23/24/25/41	XP_002915228.1//PREDICTED: calcium-binding mitochondrial carrier protein SCaMC-2 isoform X4 [Ailuropoda melanoleuca];XP_008823518.1//PREDICTED: calcium-binding mitochondrial carrier protein SCaMC-2 isoform X2 [Nannospalax galili];XP_003407751.1//PREDICTED: calcium-binding mitochondrial carrier protein SCaMC-2 isoform X1 [Loxodonta africana];XP_003785388.1//PREDICTED: calcium-binding mitochondrial…
276952	Rasl10b	3481	1155.99	469.262	-1.30066	1.71714e-06	Down	1.88697e-08	GO:0016020//membrane	GO:0005525//GTP binding;GO:0003924//GTPase activity	GO:0007165//signal transduction	K07851//Ras-like protein family member 10B	XP_009430660.1//PREDICTED: ras-like protein family member 10B isoform X1 [Pan troglodytes]
56318	Acpp	4442	594.228	245.059	-1.27789	0.00659334	Down	0.000304308	GO:0005765//lysosomal membrane;GO:0070062//extracellular exosome;GO:0005634//nucleus;GO:0005615//extracellular space;GO:0005622//intracellular;GO:0030175//filopodium;GO:0012506//vesicle membrane;GO:0016021//integral component of membrane;GO:0005886//plasma membrane	GO:0052642//lysophosphatidic acid phosphatase activity;GO:0008253//5'-nucleotidase activity;GO:0042802//identical protein binding;GO:0003993//acid phosphatase activity;GO:0042131//thiamine phosphate phosphatase activity;GO:0042803//protein homodimerization activity;GO:0016791//phosphatase activity	GO:0060168//positive regulation of adenosine receptor signaling pathway;GO:0051289//protein homotetramerization;GO:0009117//nucleotide metabolic process;GO:0046085//adenosine metabolic process;GO:0051930//regulation of sensory perception of pain;GO:0006144//purine nucleobase metabolic process;GO:0006772//thiamine metabolic process;GO:0016311//dephosphorylation	K19283//prostatic aicd phosphatase [EC:3.1.3.2 3.1.3.5]	EDL21090.1//acid phosphatase, prostate, isoform CRA_b, partial [Mus musculus]
237082	Nxt2	2513	616.204	254.147	-1.27775	5.07829e-07	Down	4.83318e-09	GO:0005634//nucleus;GO:0005654//nucleoplasm;GO:0005829//cytosol;GO:0005737//cytoplasm;GO:0048471//perinuclear region of cytoplasm	NA	GO:0006810//transport;GO:0015031//protein transport;GO:0051028//mRNA transport	K14285//NTF2-related export protein 1/2	AAH64727.1//Nxt2 protein, partial [Mus musculus];BAC27701.1//unnamed protein product [Mus musculus];NP_001277461.1//NTF2-related export protein 2 isoform b [Mus musculus]
27883	Tango2	1529	1121.48	463.489	-1.2748	5.07829e-07	Down	4.83647e-09	GO:0005794//Golgi apparatus	NA	NA	NA	NP_613049.2//transport and Golgi organization 2 homolog [Mus musculus]
11804	Aplp2	3618	5368.89	2219.38	-1.27447	5.5575e-12	Down	1.22143e-14	GO:0016021//integral component of membrane	GO:0004867//serine-type endopeptidase inhibitor activity;GO:0046914//transition metal ion binding;GO:0008201//heparin binding	NA	K08117//amyloid-like protein 2	EDL25339.1//amyloid beta (A4) precursor-like protein 2, isoform CRA_a, partial [Mus musculus];BAE29207.1//unnamed protein product [Mus musculus]
240660	Slc35g1	3471	1035.66	428.52	-1.27312	8.92721e-11	Down	2.83403e-13	GO:0016021//integral component of membrane;GO:0005789//endoplasmic reticulum membrane;GO:0005886//plasma membrane	NA	GO:1990034//calcium ion export across plasma membrane;GO:0051480//regulation of cytosolic calcium ion concentration	NA	NP_780716.1//solute carrier family 35 member G1 [Mus musculus]
99929	Tiparp	4154	397.556	164.778	-1.27064	0.000156769	Down	3.37502e-06	GO:0005634//nucleus	GO:0046872//metal ion binding;GO:0035326//enhancer binding;GO:0003950//NAD+ ADP-ribosyltransferase activity	GO:0048008//platelet-derived growth factor receptor signaling pathway;GO:0001822//kidney development;GO:0048745//smooth muscle tissue development;GO:0010629//negative regulation of gene expression;GO:0044236//multicellular organism metabolic process;GO:0006807//nitrogen compound metabolic process;GO:0009791//post-embryonic development;GO:0071407//cellular response to organic cyclic compound;GO:00…	K15259//poly [ADP-ribose] polymerase 7/11/12/13 [EC:2.4.2.30]	NP_849223.2//TCDD-inducible poly [ADP-ribose] polymerase [Mus musculus]
13370	Dio1	1682	395.063	164.604	-1.26308	0.0134336	Down	0.000736472	GO:0016021//integral component of membrane;GO:0005789//endoplasmic reticulum membrane	GO:0004800//thyroxine 5'-deiodinase activity;GO:0008430//selenium binding	GO:0042446//hormone biosynthetic process	K01562//type I thyroxine 5'-deiodinase [EC:1.21.99.4]	NP_031886.3//type I iodothyronine deiodinase [Mus musculus]
242702	Myom3	5578	776.574	323.656	-1.26266	0.00227571	Down	8.19701e-05	GO:0031430//M band	GO:0042803//protein homodimerization activity	NA	K12567//titin [EC:2.7.11.1]	XP_003750108.1//PREDICTED: myomesin-3 isoform X1 [Rattus norvegicus]
107568	Wwp1	6433	2081.67	875.36	-1.24979	1.23506e-08	Down	8.01939e-11	GO:0070062//extracellular exosome;GO:0005634//nucleus;GO:0005886//plasma membrane;GO:0005737//cytoplasm	GO:0061630//ubiquitin protein ligase activity;GO:0004842//ubiquitin-protein transferase activity	GO:0045892//negative regulation of transcription, DNA-templated;GO:0030324//lung development;GO:0006511//ubiquitin-dependent protein catabolic process;GO:0043161//proteasome-mediated ubiquitin-dependent protein catabolic process;GO:0016567//protein ubiquitination;GO:0030217//T cell differentiation;GO:0042787//protein ubiquitination involved in ubiquitin-dependent protein catabolic process	K05633//atrophin-1 interacting protein 5 (WW domain containing E3 ubiquitin protein ligase 1) [EC:2.3.2.26]	NP_001263221.1//NEDD4-like E3 ubiquitin-protein ligase WWP1 isoform 2 [Mus musculus];NP_796301.2//NEDD4-like E3 ubiquitin-protein ligase WWP1 isoform 1 [Mus musculus]
18701	Pigf	980	164.063	69.3626	-1.24202	0.00239532	Down	8.71557e-05	GO:0016021//integral component of membrane;GO:0005789//endoplasmic reticulum membrane	GO:0016780//phosphotransferase activity, for other substituted phosphate groups	GO:0006506//GPI anchor biosynthetic process;GO:0016254//preassembly of GPI anchor in ER membrane	K05287//phosphatidylinositol glycan, class F [EC:2.7.-.-]	NP_032864.1//phosphatidylinositol-glycan biosynthesis class F protein [Mus musculus]
18628	Per3	5996	185.171	78.4633	-1.23877	0.00641452	Down	0.000293936	GO:0005634//nucleus;GO:0005737//cytoplasm	GO:0031625//ubiquitin protein ligase binding;GO:0019900//kinase binding	GO:0000122//negative regulation of transcription from RNA polymerase II promoter;GO:0007623//circadian rhythm;GO:0006351//transcription, DNA-templated;GO:0032922//circadian regulation of gene expression;GO:0050821//protein stabilization;GO:0045187//regulation of circadian sleep/wake cycle, sleep	K21945//period circadian protein 3	NP_035197.2//period circadian protein homolog 3 isoform 2 [Mus musculus];NP_001276806.1//period circadian protein homolog 3 isoform 1 [Mus musculus]
56338	Txnip	2800	2841.96	1205.64	-1.23708	1.83666e-07	Down	1.54737e-09	GO:0005634//nucleus;GO:0005829//cytosol;GO:0005758//mitochondrial intermembrane space;GO:0005737//cytoplasm	GO:0031625//ubiquitin protein ligase binding;GO:0004857//enzyme inhibitor activity	GO:0051782//negative regulation of cell division;GO:0048008//platelet-derived growth factor receptor signaling pathway;GO:0030216//keratinocyte differentiation;GO:0042127//regulation of cell proliferation;GO:0032570//response to progesterone;GO:0000122//negative regulation of transcription from RNA polymerase II promoter;GO:0043065//positive regulation of apoptotic process;GO:0032355//response to…	K20910//thioredoxin-interacting protein	EDL38892.1//thioredoxin interacting protein, isoform CRA_a, partial [Mus musculus]
226744	Cnst	4568	349.404	148.266	-1.23671	2.5631e-05	Down	4.08407e-07	GO:0016020//membrane;GO:0043231//intracellular membrane-bounded organelle;GO:0030133//transport vesicle;GO:0043234//protein complex;GO:0016021//integral component of membrane;GO:0005802//trans-Golgi network;GO:0005886//plasma membrane	GO:0019902//phosphatase binding;GO:0071253//connexin binding	GO:0042998//positive regulation of Golgi to plasma membrane protein transport;GO:0010923//negative regulation of phosphatase activity	K17581//consortin	NP_666217.2//consortin [Mus musculus]
67477	Abhd15	3249	801.447	340.216	-1.23616	0.000120303	Down	2.44573e-06	GO:0016020//membrane;GO:0005576//extracellular region	GO:0016787//hydrolase activity;GO:0016788//hydrolase activity, acting on ester bonds	GO:0044255//cellular lipid metabolic process	K13707//abhydrolase domain-containing protein 15	NP_080461.3//protein ABHD15 precursor [Mus musculus]
26940	Ecsit	1578	596.35	253.786	-1.23255	3.11955e-10	Down	1.1046e-12	GO:0005634//nucleus;GO:0005654//nucleoplasm;GO:0005667//transcription factor complex;GO:0005829//cytosol;GO:0005739//mitochondrion;GO:0005737//cytoplasm	GO:0016651//oxidoreductase activity, acting on NAD(P)H;GO:0004871//signal transducer activity;GO:0003700//DNA binding transcription factor activity	GO:0001707//mesoderm formation;GO:0006357//regulation of transcription from RNA polymerase II promoter;GO:0007178//transmembrane receptor protein serine/threonine kinase signaling pathway;GO:0030509//BMP signaling pathway;GO:0051341//regulation of oxidoreductase activity;GO:0045087//innate immune response	K04405//evolutionarily conserved signaling intermediate in Toll pathway	NP_036159.1//evolutionarily conserved signaling intermediate in Toll pathway, mitochondrial precursor [Mus musculus]
66273	Aamdc	849	416.057	177.091	-1.23229	6.10306e-09	Down	3.61415e-11	GO:0005737//cytoplasm	NA	GO:0045944//positive regulation of transcription from RNA polymerase II promoter;GO:0045600//positive regulation of fat cell differentiation;GO:0043066//negative regulation of apoptotic process	K11997//tripartite motif-containing protein 2/3	NP_001171417.1//mth938 domain-containing protein isoform 3 [Mus musculus];NP_001171416.1//mth938 domain-containing protein isoform 1 [Mus musculus]
52014	Nus1	4614	1131.86	482.29	-1.23072	2.17578e-07	Down	1.87293e-09	GO:0016020//membrane;GO:0016021//integral component of membrane;GO:0005789//endoplasmic reticulum membrane	GO:0004659//prenyltransferase activity	GO:0055092//sterol homeostasis;GO:0032383//regulation of intracellular cholesterol transport;GO:0030154//cell differentiation;GO:0001525//angiogenesis;GO:0042632//cholesterol homeostasis;GO:0019408//dolichol biosynthetic process;GO:0035268//protein mannosylation	K19177//dehydrodolichyl diphosphate syntase complex subunit NUS1 [EC:2.5.1.87]	XP_014446829.1//PREDICTED: dehydrodolichyl diphosphate syntase complex subunit NUS1 [Tupaia chinensis]
110208	Pgd	2224	1621.21	695.145	-1.22169	0.000180043	Down	4.03394e-06	GO:0070062//extracellular exosome;GO:0005634//nucleus;GO:0005737//cytoplasm	GO:0004616//phosphogluconate dehydrogenase (decarboxylating) activity	GO:0019322//pentose biosynthetic process;GO:0006098//pentose-phosphate shunt;GO:0019521//D-gluconate metabolic process;GO:0009051//pentose-phosphate shunt, oxidative branch;GO:0055114//oxidation-reduction process	K00033//6-phosphogluconate dehydrogenase [EC:1.1.1.44 1.1.1.343]	NP_001074743.1//6-phosphogluconate dehydrogenase, decarboxylating [Mus musculus]
16548	Khk	1117	18277.8	7855.41	-1.21833	3.37575e-07	Down	3.11195e-09	GO:0070062//extracellular exosome;GO:0005634//nucleus;GO:0005737//cytoplasm	GO:0004454//ketohexokinase activity;GO:0005524//ATP binding	GO:0006000//fructose metabolic process;GO:0061624//fructose catabolic process to hydroxyacetone phosphate and glyceraldehyde-3-phosphate;GO:0070873//regulation of glycogen metabolic process;GO:0061625//glycolytic process through fructose-1-phosphate	K00846//ketohexokinase [EC:2.7.1.3]	NP_032465.2//ketohexokinase isoform 2 [Mus musculus]
11655	Alas1	2705	2142.57	926.945	-1.20879	0.0174318	Down	0.00103122	GO:0005759//mitochondrial matrix;GO:0005654//nucleoplasm;GO:0005829//cytosol;GO:0005739//mitochondrion	GO:0042802//identical protein binding;GO:0003870//5-aminolevulinate synthase activity;GO:0030170//pyridoxal phosphate binding	GO:0006782//protoporphyrinogen IX biosynthetic process	K00643//5-aminolevulinate synthase [EC:2.3.1.37]	NP_065584.2//5-aminolevulinate synthase, nonspecific, mitochondrial precursor [Mus musculus]
20893	Bhlhe40	3113	3519.8	1527.04	-1.20476	0.00216473	Down	7.68286e-05	GO:0005634//nucleus;GO:0016604//nuclear body;GO:0005737//cytoplasm	GO:0000981//RNA polymerase II transcription factor activity, sequence-specific DNA binding;GO:0003677//DNA binding;GO:0003714//transcription corepressor activity;GO:0070888//E-box binding;GO:0046982//protein heterodimerization activity;GO:0003705//transcription factor activity, RNA polymerase II distal enhancer sequence-specific binding;GO:0042803//protein homodimerization activity;GO:0001078//tr…	GO:0045892//negative regulation of transcription, DNA-templated;GO:0043153//entrainment of circadian clock by photoperiod;GO:0007623//circadian rhythm;GO:0009416//response to light stimulus;GO:0043433//negative regulation of DNA binding transcription factor activity;GO:0006351//transcription, DNA-templated;GO:0000122//negative regulation of transcription from RNA polymerase II promoter;GO:0032922…	K03729//class B basic helix-loop-helix protein 2	NP_035628.1//class E basic helix-loop-helix protein 40 [Mus musculus]
215751	Ginm1	1557	1032.1	447.984	-1.20406	9.112e-09	Down	5.61851e-11	GO:0070062//extracellular exosome;GO:0016021//integral component of membrane	NA	NA	NA	NP_663393.1//glycoprotein integral membrane protein 1 isoform 1 precursor [Mus musculus]
56316	Ggcx	3323	882.774	383.378	-1.20328	2.75313e-11	Down	7.05932e-14	GO:0016021//integral component of membrane;GO:0005789//endoplasmic reticulum membrane	GO:0008488//gamma-glutamyl carboxylase activity	GO:0017187//peptidyl-glutamic acid carboxylation	K10106//vitamin K-dependent gamma-carboxylase [EC:4.1.1.90]	NP_062776.1//vitamin K-dependent gamma-carboxylase [Mus musculus]
240066	Zfp870	5321	184.72	80.396	-1.20015	0.0294431	Down	0.00204017	NA	NA	NA	K09228//KRAB domain-containing zinc finger protein	XP_008774621.1//PREDICTED: zinc finger protein 709-like isoform X2 [Rattus norvegicus]
74155	Errfi1	3034	14723.6	6421.42	-1.19716	0.00258374	Down	9.52735e-05	GO:0005634//nucleus;GO:0031234//extrinsic component of cytoplasmic side of plasma membrane;GO:0005829//cytosol;GO:0005737//cytoplasm	GO:0031267//small GTPase binding;GO:0017124//SH3 domain binding;GO:0019901//protein kinase binding	GO:0043589//skin morphogenesis;GO:1903243//negative regulation of cardiac muscle hypertrophy in response to stress;GO:0061469//regulation of type B pancreatic cell proliferation;GO:0032691//negative regulation of interleukin-1 beta production;GO:0050732//negative regulation of peptidyl-tyrosine phosphorylation;GO:0036120//cellular response to platelet-derived growth factor stimulus;GO:0031098//st…	K08886//activated CDC42 kinase 1 [EC:2.7.10.2 2.7.11.1]	NP_598514.1//ERBB receptor feedback inhibitor 1 [Mus musculus]
67867	Lrrc28	2578	860.448	375.871	-1.19485	5.72779e-08	Down	4.26612e-10	NA	NA	GO:0007165//signal transduction	K16175//protein scribble;K10130//leucine-rich repeats and death domain-containing protein	NP_780333.3//leucine-rich repeat-containing protein 28 isoform 1 [Mus musculus];NP_081689.1//leucine-rich repeat-containing protein 28 isoform 2 [Mus musculus]
72621	Pdzd11	1015	263.447	115.581	-1.18862	2.14228e-06	Down	2.42071e-08	GO:0016323//basolateral plasma membrane;GO:0005829//cytosol;GO:0005911//cell-cell junction;GO:0098793//presynapse;GO:0005576//extracellular region;GO:0045202//synapse	GO:0008022//protein C-terminus binding	GO:0055085//transmembrane transport;GO:1903361//protein localization to basolateral plasma membrane;GO:0034220//ion transmembrane transport;GO:0019730//antimicrobial humoral response;GO:0006768//biotin metabolic process;GO:0007269//neurotransmitter secretion;GO:0015939//pantothenate metabolic process;GO:0045199//maintenance of epithelial cell apical/basal polarity	K21882//PDZ domain-containing protein 7	EDL14176.1//PDZ domain containing 11, isoform CRA_c, partial [Mus musculus]
13405	Dmd	13857	792.13	348.14	-1.18607	1.92524e-06	Down	2.15091e-08	GO:0030424//axon;GO:0042995//cell projection;GO:0030054//cell junction;GO:0097449//astrocyte projection	GO:0003779//actin binding;GO:0005178//integrin binding;GO:0002162//dystroglycan binding;GO:0005521//lamin binding	GO:0030154//cell differentiation;GO:0060048//cardiac muscle contraction;GO:0086001//cardiac muscle cell action potential;GO:0007568//aging	K10366//dystrophin	XP_006527830.1//PREDICTED: dystrophin isoform X1 [Mus musculus]
21813	Tgfbr2	4767	1621.03	713.075	-1.18478	5.44952e-10	Down	2.0627e-12	GO:0005901//caveola;GO:0005887//integral component of plasma membrane;GO:0009897//external side of plasma membrane;GO:0005829//cytosol;GO:0016021//integral component of membrane;GO:0005886//plasma membrane;GO:0043235//receptor complex	GO:0046872//metal ion binding;GO:0005524//ATP binding;GO:0004702//signal transducer, downstream of receptor, with serine/threonine kinase activity;GO:0031435//mitogen-activated protein kinase kinase kinase binding;GO:0005539//glycosaminoglycan binding;GO:0005026//transforming growth factor beta receptor activity, type II	GO:0031100//animal organ regeneration;GO:0030154//cell differentiation;GO:0040008//regulation of growth;GO:0032147//activation of protein kinase activity;GO:0007420//brain development;GO:0006915//apoptotic process;GO:0007568//aging;GO:0007179//transforming growth factor beta receptor signaling pathway	K04388//TGF-beta receptor type-2 [EC:2.7.11.30]	NP_083851.3//TGF-beta receptor type-2 isoform 2 precursor [Mus musculus];NP_033397.3//TGF-beta receptor type-2 isoform 1 precursor [Mus musculus]
231510	Gpat3	2877	259.732	114.268	-1.18461	5.94844e-06	Down	7.73515e-08	GO:0005783//endoplasmic reticulum;GO:0016021//integral component of membrane;GO:0005789//endoplasmic reticulum membrane	GO:0004366//glycerol-3-phosphate O-acyltransferase activity;GO:0003841//1-acylglycerol-3-phosphate O-acyltransferase activity;GO:0102420//sn-1-glycerol-3-phosphate C16:0-DCA-CoA acyl transferase activity	GO:0032006//regulation of TOR signaling;GO:0019432//triglyceride biosynthetic process;GO:0016024//CDP-diacylglycerol biosynthetic process	K13506//glycerol-3-phosphate O-acyltransferase 3/4 [EC:2.3.1.15]	NP_766303.1//glycerol-3-phosphate acyltransferase 3 [Mus musculus]
103655	Sec14l4	2956	3835.62	1689.42	-1.18293	2.23069e-06	Down	2.54664e-08	GO:0005622//intracellular;GO:0016021//integral component of membrane	GO:0005215//transporter activity	NA	K01019//galactosylceramide sulfotransferase [EC:2.8.2.11];K19625//retinaldehyde-binding protein 1;K12850//pre-mRNA-splicing factor 38B;K17981//mitochondrial fission process protein 1	XP_021508260.1//SEC14-like protein 4 isoform X1 [Meriones unguiculatus]
277898	Slc15a5	2461	218.586	96.2815	-1.18287	0.00102463	Down	3.06513e-05	GO:0016021//integral component of membrane	GO:0015293//symporter activity;GO:0005215//transporter activity	GO:0015031//protein transport	K14639//solute carrier family 15, member 5	NP_808455.2//solute carrier family 15 member 5 [Mus musculus]
72823	Pard3b	8409	115.671	51.1599	-1.17694	0.00590446	Down	0.000260979	GO:0043234//protein complex;GO:0030054//cell junction	NA	NA	K04237//partitioning defective protein 3	XP_021053619.1//partitioning defective 3 homolog B isoform X1 [Mus pahari]
18708	Pik3r1	6476	1655.05	733.961	-1.1731	4.30354e-10	Down	1.56209e-12	GO:0016020//membrane;GO:0005634//nucleus;GO:1990578//perinuclear endoplasmic reticulum membrane;GO:0005737//cytoplasm;GO:0005801//cis-Golgi network;GO:0043234//protein complex;GO:0005911//cell-cell junction;GO:0005829//cytosol;GO:0005942//phosphatidylinositol 3-kinase complex;GO:0016021//integral component of membrane;GO:0005943//phosphatidylinositol 3-kinase complex, class IA	GO:0016301//kinase activity;GO:0036312//phosphatidylinositol 3-kinase regulatory subunit binding;GO:0019903//protein phosphatase binding;GO:0046982//protein heterodimerization activity;GO:0035014//phosphatidylinositol 3-kinase regulator activity;GO:0043559//insulin binding;GO:0046935//1-phosphatidylinositol-3-kinase regulator activity;GO:0001784//phosphotyrosine residue binding;GO:0016303//1-phos…	GO:0033120//positive regulation of RNA splicing;GO:2001275//positive regulation of glucose import in response to insulin stimulus;GO:0045671//negative regulation of osteoclast differentiation;GO:0030335//positive regulation of cell migration;GO:0008286//insulin receptor signaling pathway;GO:0007162//negative regulation of cell adhesion;GO:0008625//extrinsic apoptotic signaling pathway via death d…	K02649//phosphoinositide-3-kinase regulatory subunit alpha/beta/delta	NP_001020126.1//phosphatidylinositol 3-kinase regulatory subunit alpha isoform 1 [Mus musculus];NP_001070963.1//phosphatidylinositol 3-kinase regulatory subunit alpha isoform 2 [Mus musculus]
216227	Slc17a8	4452	1026.54	457.631	-1.16554	0.0293849	Down	0.00203255	GO:0030425//dendrite;GO:0097441//basal dendrite;GO:0060076//excitatory synapse;GO:0031410//cytoplasmic vesicle;GO:0030054//cell junction;GO:1990030//pericellular basket;GO:0097440//apical dendrite;GO:0005737//cytoplasm;GO:0043025//neuronal cell body;GO:0043204//perikaryon;GO:0030672//synaptic vesicle membrane;GO:0097451//glial limiting end-foot;GO:0016021//integral component of membrane;GO:000577…	GO:0005313//L-glutamate transmembrane transporter activity;GO:0015293//symporter activity	GO:0003407//neural retina development;GO:0007605//sensory perception of sound;GO:0015813//L-glutamate transport;GO:0090102//cochlea development;GO:0006814//sodium ion transport;GO:0006836//neurotransmitter transport;GO:0007420//brain development	K12302//MFS transporter, ACS family, solute carrier family 17 (sodium-dependent inorganic phosphate cotransporter), member 6/7/8	NP_892004.1//vesicular glutamate transporter 3 isoform 1 [Mus musculus]
17165	Mapkapk5	2229	483.41	215.892	-1.16294	8.97488e-08	Down	6.90375e-10	NA	NA	NA	K04442//mitogen-activated protein kinase-activated protein kinase 5 [EC:2.7.11.1]	XP_021088990.1//MAP kinase-activated protein kinase 5 [Mesocricetus auratus]
244421	Lonrf1	3930	82.2845	36.8533	-1.15883	0.00516844	Down	0.000220243	NA	GO:0046872//metal ion binding	NA	K21958//extracellular serine/threonine protein kinase FAM20C [EC:2.7.11.1];K20804//E3 ubiquitin-protein ligase RNF34 [EC:2.3.2.27]	NP_001074619.1//LON peptidase N-terminal domain and RING finger protein 1 [Mus musculus]
22361	Vnn1	2416	643.164	289.241	-1.15292	0.0225238	Down	0.00143256	GO:0070062//extracellular exosome;GO:0016021//integral component of membrane;GO:0005886//plasma membrane;GO:0031225//anchored component of membrane	GO:0017159//pantetheine hydrolase activity;GO:0034235//GPI anchor binding	GO:1902176//negative regulation of oxidative stress-induced intrinsic apoptotic signaling pathway;GO:0033089//positive regulation of T cell differentiation in thymus;GO:0002526//acute inflammatory response;GO:0006954//inflammatory response;GO:0098609//cell-cell adhesion;GO:0002544//chronic inflammatory response;GO:0015939//pantothenate metabolic process;GO:0045087//innate immune response	K08069//pantetheine hydrolase [EC:3.5.1.92]	NP_035834.2//pantetheinase precursor [Mus musculus]
68032	Emc4	975	799.639	359.724	-1.15246	7.95629e-15	Down	8.74317e-18	GO:0072546//ER membrane protein complex;GO:0016021//integral component of membrane	NA	GO:0034975//protein folding in endoplasmic reticulum;GO:0006915//apoptotic process	K18203//[phosphatase 2A protein]-leucine-carboxy methyltransferase [EC:2.1.1.233]	NP_080795.1//ER membrane protein complex subunit 4 [Mus musculus]
76454	Fbxo31	4372	871.547	393.92	-1.14568	0.0119979	Down	0.000641647	GO:0005813//centrosome;GO:0019005//SCF ubiquitin ligase complex;GO:0043025//neuronal cell body	GO:0004842//ubiquitin-protein transferase activity;GO:0030332//cyclin binding	GO:0031571//mitotic G1 DNA damage checkpoint;GO:0050775//positive regulation of dendrite morphogenesis;GO:0031145//anaphase-promoting complex-dependent catabolic process;GO:0031146//SCF-dependent proteasomal ubiquitin-dependent protein catabolic process;GO:0006974//cellular response to DNA damage stimulus;GO:2001224//positive regulation of neuron migration	K10308//F-box protein 31	NP_598526.3//F-box only protein 31 [Mus musculus]
75212	Rnf121	1502	238.241	107.704	-1.14535	2.76877e-05	Down	4.53703e-07	GO:0016021//integral component of membrane;GO:0005789//endoplasmic reticulum membrane;GO:0000139//Golgi membrane	GO:0061630//ubiquitin protein ligase activity;GO:0046872//metal ion binding	GO:0030433//ubiquitin-dependent ERAD pathway;GO:0030968//endoplasmic reticulum unfolded protein response	K15698//RING finger protein 121	NP_083487.2//RING finger protein 121 [Mus musculus]
17256	Mea1	865	601.956	272.506	-1.14337	1.00774e-09	Down	4.30658e-12	GO:0005737//cytoplasm	NA	GO:0030154//cell differentiation;GO:0007275//multicellular organism development;GO:0007283//spermatogenesis	NA	XP_008827330.2//PREDICTED: male-enhanced antigen 1 isoform X1 [Nannospalax galili];XP_021041938.1//male-enhanced antigen 1 isoform X2 [Mus caroli];XP_021041937.1//male-enhanced antigen 1 isoform X1 [Mus caroli];NP_001264238.1//male-enhanced antigen 1 isoform a [Mus musculus]
72503	2610507B11Rik	7554	2464.36	1117.14	-1.1414	4.41966e-12	Down	9.17391e-15	NA	NA	NA	K17529//uncharacterized serine/threonine-protein kinase SgK494 [EC:2.7.11.1];K09291//nucleoprotein TPR	XP_021033922.1//protein KIAA0100 homolog [Mus caroli]
225913	Tkfc	2350	24268.2	11045.5	-1.13561	2.40926e-07	Down	2.11803e-09	GO:0070062//extracellular exosome;GO:0005634//nucleus	GO:0046872//metal ion binding;GO:0005524//ATP binding;GO:0034012//FAD-AMP lyase (cyclizing) activity;GO:0050354//triokinase activity;GO:0004371//glycerone kinase activity	GO:0006071//glycerol metabolic process;GO:0046835//carbohydrate phosphorylation;GO:0039534//negative regulation of MDA-5 signaling pathway;GO:0061624//fructose catabolic process to hydroxyacetone phosphate and glyceraldehyde-3-phosphate;GO:0045088//regulation of innate immune response;GO:0044262//cellular carbohydrate metabolic process;GO:0061625//glycolytic process through fructose-1-phosphate	K00863//triose/dihydroxyacetone kinase / FAD-AMP lyase (cyclizing) [EC:2.7.1.28 2.7.1.29 4.6.1.15]	NP_663471.1//triokinase/FMN cyclase [Mus musculus]
69288	Rhobtb1	4312	921.956	420.778	-1.13164	9.12765e-05	Down	1.76646e-06	GO:0005622//intracellular	GO:0005525//GTP binding;GO:0003924//GTPase activity	GO:0007264//small GTPase mediated signal transduction	K07868//Rho-related BTB domain-containing protein 1/2	NP_001074816.1//rho-related BTB domain-containing protein 1 isoform 1 [Mus musculus]
14739	S1pr2	2815	91.8851	42.1111	-1.12563	0.00628345	Down	0.0002831	GO:0016021//integral component of membrane;GO:0005886//plasma membrane	GO:0005178//integrin binding;GO:0001664//G-protein coupled receptor binding;GO:0038036//sphingosine-1-phosphate receptor activity	GO:0003376//sphingosine-1-phosphate signaling pathway;GO:0010800//positive regulation of peptidyl-threonine phosphorylation;GO:0090394//negative regulation of excitatory postsynaptic potential;GO:0031532//actin cytoskeleton reorganization;GO:0046847//filopodium assembly;GO:1903142//positive regulation of establishment of endothelial barrier	K04292//sphingosine 1-phosphate receptor 2	NP_034463.2//sphingosine 1-phosphate receptor 2 [Mus musculus]
66686	Dcbld1	3025	89.7478	41.1825	-1.12385	0.0143559	Down	0.000802807	GO:0016021//integral component of membrane	GO:0070492//oligosaccharide binding	NA	K14616//cubilin	NP_079981.2//discoidin, CUB and LCCL domain-containing protein 1 isoform 1 precursor [Mus musculus]
229317	Eif2a	2322	634.809	291.611	-1.12228	6.916e-07	Down	6.75556e-09	GO:0005615//extracellular space;GO:0072562//blood microparticle;GO:0005850//eukaryotic translation initiation factor 2 complex;GO:0022627//cytosolic small ribosomal subunit;GO:0005737//cytoplasm	GO:0043022//ribosome binding;GO:0003743//translation initiation factor activity;GO:0003729//mRNA binding;GO:0000049//tRNA binding;GO:0045296//cadherin binding	GO:1990928//response to amino acid starvation;GO:0009967//positive regulation of signal transduction;GO:0006412//translation;GO:0006468//protein phosphorylation;GO:0006417//regulation of translation;GO:0032933//SREBP signaling pathway;GO:0042255//ribosome assembly	K15026//translation initiation factor 2A	BAC37320.1//unnamed protein product, partial [Mus musculus]
269823	Pon3	1784	1427.33	656.065	-1.1214	1.24128e-09	Down	5.38039e-12	GO:0043231//intracellular membrane-bounded organelle;GO:0070062//extracellular exosome;GO:0005615//extracellular space	GO:0046872//metal ion binding;GO:0047856//dihydrocoumarin hydrolase activity;GO:0004063//aryldialkylphosphatase activity;GO:0004064//arylesterase activity;GO:0018733//3,4-dihydrocoumarin hydrolase activity;GO:0102007//acyl-L-homoserine-lactone lactonohydrolase activity;GO:0042803//protein homodimerization activity	GO:0046226//coumarin catabolic process;GO:0046395//carboxylic acid catabolic process;GO:0019439//aromatic compound catabolic process;GO:0010124//phenylacetate catabolic process;GO:0032929//negative regulation of superoxide anion generation;GO:0009636//response to toxic substance	K01045//arylesterase / paraoxonase [EC:3.1.1.2 3.1.8.1]	XP_021020323.1//serum paraoxonase/lactonase 3 [Mus caroli]
71918	Zcchc24	4375	1841.04	854.828	-1.10681	5.59401e-07	Down	5.36178e-09	NA	GO:0003723//RNA binding;GO:0008270//zinc ion binding;GO:0003676//nucleic acid binding	NA	NA	NP_001094903.1//zinc finger CCHC domain-containing protein 24 [Mus musculus]
96875	Prg4	4062	1619.3	753.464	-1.10376	0.0257741	Down	0.00171355	GO:0031012//extracellular matrix;GO:0005615//extracellular space	GO:0005044//scavenger receptor activity;GO:0030247//polysaccharide binding	GO:0071425//hematopoietic stem cell proliferation;GO:0042127//regulation of cell proliferation;GO:0045409//negative regulation of interleukin-6 biosynthetic process;GO:0006955//immune response	K10955//mucin-2;K06251//vitronectin	NP_067375.3//proteoglycan 4 isoform 1 precursor [Mus musculus];NP_001103616.1//proteoglycan 4 isoform 2 precursor [Mus musculus]
27402	Pdhx	2527	853.936	397.359	-1.10368	1.43896e-08	Down	9.57549e-11	GO:0005759//mitochondrial matrix;GO:0045254//pyruvate dehydrogenase complex;GO:0005739//mitochondrion	GO:0016746//transferase activity, transferring acyl groups;GO:0034604//pyruvate dehydrogenase (NAD+) activity	GO:0061732//mitochondrial acetyl-CoA biosynthetic process from pyruvate	K13997//dihydrolipoamide dehydrogenase-binding protein of pyruvate dehydrogenase complex	NP_780303.1//pyruvate dehydrogenase protein X component, mitochondrial [Mus musculus]
16529	Kcnk5	3364	1253.82	584.397	-1.1013	0.0013083	Down	4.10542e-05	GO:0005887//integral component of plasma membrane;GO:0016021//integral component of membrane	GO:0005249//voltage-gated potassium channel activity;GO:0022841//potassium ion leak channel activity	GO:0030322//stabilization of membrane potential;GO:0071804//cellular potassium ion transport	K04916//potassium channel subfamily K member 5	NP_067517.1//potassium channel subfamily K member 5 [Mus musculus]
20168	Rtn3	2857	2221.29	1036.29	-1.09997	1.29442e-10	Down	4.18828e-13	GO:0070062//extracellular exosome;GO:0005783//endoplasmic reticulum;GO:0016021//integral component of membrane;GO:0005789//endoplasmic reticulum membrane;GO:0000139//Golgi membrane	NA	GO:0071787//endoplasmic reticulum tubular network formation;GO:0016192//vesicle-mediated transport;GO:0071786//endoplasmic reticulum tubular network organization;GO:0006915//apoptotic process	K20723//reticulon-3	XP_020014613.1//reticulon-3 isoform X1 [Castor canadensis];EDL33307.1//reticulon 3, isoform CRA_b, partial [Mus musculus];NP_001258416.1//reticulon-3 isoform 6 [Mus musculus];EDL33308.1//reticulon 3, isoform CRA_c, partial [Mus musculus]
69906	Slc25a32	2945	329.493	153.924	-1.09803	2.12142e-05	Down	3.28962e-07	GO:0005743//mitochondrial inner membrane;GO:0016021//integral component of membrane;GO:0005739//mitochondrion	GO:0008517//folic acid transmembrane transporter activity;GO:0015230//FAD transmembrane transporter activity	GO:0006810//transport;GO:0006544//glycine metabolic process;GO:0006839//mitochondrial transport	K15115//solute carrier family 25 (mitochondrial folate transporter), member 32	XP_008539342.1//PREDICTED: mitochondrial folate transporter/carrier isoform X2 [Equus przewalskii]
219189	Vwa8	6672	2779.87	1304.43	-1.0916	1.27472e-05	Down	1.86773e-07	GO:0005739//mitochondrion	GO:0005524//ATP binding;GO:0016887//ATPase activity	NA	K14572//midasin	XP_021036875.1//von Willebrand factor A domain-containing protein 8 [Mus caroli]
16891	Lipg	3787	163.444	76.9492	-1.08681	0.0287692	Down	0.0019724	GO:0005615//extracellular space;GO:0009986//cell surface;GO:0005794//Golgi apparatus;GO:0005576//extracellular region;GO:0005769//early endosome	GO:0004620//phospholipase activity;GO:0052689//carboxylic ester hydrolase activity;GO:0008970//phosphatidylcholine 1-acylhydrolase activity;GO:0008201//heparin binding;GO:0004465//lipoprotein lipase activity	GO:0055091//phospholipid homeostasis;GO:0016042//lipid catabolic process;GO:0032376//positive regulation of cholesterol transport;GO:0010983//positive regulation of high-density lipoprotein particle clearance;GO:0008283//cell proliferation;GO:0034375//high-density lipoprotein particle remodeling;GO:0042632//cholesterol homeostasis;GO:0007584//response to nutrient;GO:0043691//reverse cholesterol t…	K22284//endothelial lipase [EC:3.1.1.3]	NP_034850.3//endothelial lipase precursor [Mus musculus]
106389	Eaf2	1544	738.257	347.778	-1.08596	0.0296491	Down	0.00206349	GO:0032783//ELL-EAF complex	NA	GO:0006355//regulation of transcription, DNA-templated	K15186//ELL-associated factor	XP_021040456.1//ELL-associated factor 2 isoform X1 [Mus caroli]
66253	Aig1	1054	137.093	64.6835	-1.08368	0.00309649	Down	0.000119096	GO:0012505//endomembrane system;GO:0016021//integral component of membrane	NA	NA	NA	NP_079722.1//androgen-induced gene 1 protein isoform 1 [Mus musculus]
15510	Hspd1	2347	4640.13	2189.73	-1.08341	1.2056e-12	Down	2.28166e-15	GO:0009986//cell surface;GO:0005905//clathrin-coated pit;GO:0030135//coated vesicle;GO:0005737//cytoplasm	GO:0005524//ATP binding;GO:0034185//apolipoprotein binding;GO:0051087//chaperone binding;GO:0034186//apolipoprotein A-I binding	GO:0006458//'de novo' protein folding;GO:0008637//apoptotic mitochondrial changes;GO:0006919//activation of cysteine-type endopeptidase activity involved in apoptotic process;GO:0042113//B cell activation	K04077//chaperonin GroEL	NP_034607.3//60 kDa heat shock protein, mitochondrial [Mus musculus]
259301	Leap2	497	1101.41	522.484	-1.0759	0.00140125	Down	4.49973e-05	NA	NA	NA	NA	EDL33597.1//liver-expressed antimicrobial peptide 2, partial [Mus musculus]
110960	Tars	2636	3417.21	1621.51	-1.07549	2.76877e-05	Down	4.547e-07	GO:0070062//extracellular exosome;GO:0005829//cytosol;GO:0015629//actin cytoskeleton;GO:0005737//cytoplasm	GO:0004829//threonine-tRNA ligase activity;GO:0005524//ATP binding	GO:0006435//threonyl-tRNA aminoacylation	K01868//threonyl-tRNA synthetase [EC:6.1.1.3]	XP_011354764.1//PREDICTED: threonine--tRNA ligase, cytoplasmic [Pteropus vampyrus]
13036	Ctsh	1627	4072.87	1934.2	-1.07431	4.30354e-10	Down	1.57639e-12	GO:0070062//extracellular exosome;GO:0097208//alveolar lamellar body;GO:0005615//extracellular space;GO:0005829//cytosol;GO:0001669//acrosomal vesicle;GO:0005764//lysosome;GO:0005930//axoneme;GO:0001520//outer dense fiber	GO:0004252//serine-type endopeptidase activity;GO:0004175//endopeptidase activity;GO:0030108//HLA-A specific activating MHC class I receptor activity;GO:0008233//peptidase activity;GO:0008656//cysteine-type endopeptidase activator activity involved in apoptotic process;GO:0043621//protein self-association;GO:0030984//kininogen binding;GO:0070324//thyroid hormone binding;GO:0004177//aminopeptidase…	GO:0051603//proteolysis involved in cellular protein catabolic process;GO:0030335//positive regulation of cell migration;GO:0010813//neuropeptide catabolic process;GO:0007283//spermatogenesis;GO:0070371//ERK1 and ERK2 cascade;GO:1990834//response to odorant;GO:0010634//positive regulation of epithelial cell migration;GO:0002764//immune response-regulating signaling pathway;GO:0033619//membrane pr…	K01366//cathepsin H [EC:3.4.22.16]	XP_021062775.1//pro-cathepsin H isoform X1 [Mus pahari]
14366	Fzd4	3685	299.718	142.897	-1.06863	1.27831e-05	Down	1.88078e-07	GO:0070062//extracellular exosome;GO:0009986//cell surface;GO:0005911//cell-cell junction;GO:0016021//integral component of membrane;GO:0106003//amyloid-beta complex;GO:0005886//plasma membrane	GO:0019955//cytokine binding;GO:0001540//amyloid-beta binding;GO:0031625//ubiquitin protein ligase binding;GO:0046982//protein heterodimerization activity;GO:0017147//Wnt-protein binding;GO:0042803//protein homodimerization activity;GO:0004930//G-protein coupled receptor activity;GO:0042813//Wnt-activated receptor activity;GO:0030165//PDZ domain binding	GO:0061304//retinal blood vessel morphogenesis;GO:0001568//blood vessel development;GO:0045893//positive regulation of transcription, DNA-templated;GO:0031987//locomotion involved in locomotory behavior;GO:0035426//extracellular matrix-cell signaling;GO:0051091//positive regulation of DNA binding transcription factor activity;GO:0007223//Wnt signaling pathway, calcium modulating pathway;GO:000157…	K02354//frizzled 4	NP_032081.3//frizzled-4 precursor [Mus musculus]
212943	Tent5a	5465	810.12	386.261	-1.06856	4.93571e-05	Down	8.97949e-07	NA	GO:0003723//RNA binding	GO:0030193//regulation of blood coagulation;GO:0010468//regulation of gene expression	K05742//solute carrier family 9 (sodium/hydrogen exchanger), member 1;K20042//F-BAR domain only protein	NP_001153850.1//protein FAM46A isoform 1 [Mus musculus]
66968	Plin5	1960	1256.39	599.284	-1.06797	0.00321728	Down	0.000124331	GO:0005811//lipid droplet;GO:0005829//cytosol;GO:0005739//mitochondrion;GO:0005737//cytoplasm	GO:0035473//lipase binding;GO:0042802//identical protein binding	GO:0060193//positive regulation of lipase activity;GO:0060192//negative regulation of lipase activity;GO:0031999//negative regulation of fatty acid beta-oxidation;GO:0010867//positive regulation of triglyceride biosynthetic process;GO:0032000//positive regulation of fatty acid beta-oxidation;GO:0010890//positive regulation of sequestering of triglyceride;GO:0051646//mitochondrion localization;GO:…	K20255//perilipin-5	NP_001070816.1//perilipin-5 [Mus musculus]
21685	Tef	4232	1700.39	813.313	-1.06398	0.000196509	Down	4.47483e-06	GO:0005634//nucleus	GO:0000977//RNA polymerase II regulatory region sequence-specific DNA binding;GO:0043565//sequence-specific DNA binding;GO:0001077//transcriptional activator activity, RNA polymerase II proximal promoter sequence-specific DNA binding;GO:0003700//DNA binding transcription factor activity;GO:0003690//double-stranded DNA binding	GO:0006357//regulation of transcription from RNA polymerase II promoter;GO:0045944//positive regulation of transcription from RNA polymerase II promoter;GO:0007275//multicellular organism development;GO:0048511//rhythmic process	K09058//thyrotrophic embryonic factor	XP_019590010.1//PREDICTED: thyrotroph embryonic factor isoform X1 [Rhinolophus sinicus];XP_004845581.2//thyrotroph embryonic factor isoform X1 [Heterocephalus glaber]
12819	Col15a1	5335	173.548	83.466	-1.05607	0.03378	Down	0.00243967	NA	NA	NA	K06823//collagen, type XVIII, alpha	XP_020026987.1//LOW QUALITY PROTEIN: collagen alpha-1(XV) chain [Castor canadensis]
52392	D1Ertd622e	2738	528.312	254.488	-1.05379	1.71714e-06	Down	1.86895e-08	GO:0035869//ciliary transition zone;GO:0005737//cytoplasm	NA	GO:0060271//cilium assembly;GO:0010764//negative regulation of fibroblast migration;GO:1900016//negative regulation of cytokine production involved in inflammatory response;GO:0015031//protein transport	NA	EDL39904.1//DNA segment, Chr 1, ERATO Doi 622, expressed, isoform CRA_b, partial [Mus musculus]
67701	Wfdc2	708	124.054	59.7796	-1.05324	0.0169145	Down	0.00099236	GO:0070062//extracellular exosome	GO:0004867//serine-type endopeptidase inhibitor activity;GO:0019828//aspartic-type endopeptidase inhibitor activity;GO:0004869//cysteine-type endopeptidase inhibitor activity	NA	K03910//alpha-2-macroglobulin	NP_080599.1//WAP four-disulfide core domain protein 2 precursor [Mus musculus]
66818	Smim7	2842	634.106	305.658	-1.0528	5.08218e-09	Down	2.85446e-11	GO:0016021//integral component of membrane	NA	NA	K20291//conserved oligomeric Golgi complex subunit 4	OBS70639.1//hypothetical protein A6R68_00831 [Neotoma lepida]
100190996	None	4029	432.284	209.385	-1.04582	2.82635e-08	Down	2.00157e-10	GO:0005622//intracellular	GO:0046872//metal ion binding;GO:0000976//transcription regulatory region sequence-specific DNA binding;GO:0003700//DNA binding transcription factor activity;GO:0003676//nucleic acid binding	GO:0006355//regulation of transcription, DNA-templated	K09228//KRAB domain-containing zinc finger protein	NP_001171039.1//KRAB box and zinc finger C2H2 type domain containing protein-like [Mus musculus]
56050	Cyp39a1	3104	4378.63	2121.21	-1.04559	6.0088e-08	Down	4.5121e-10	GO:0043231//intracellular membrane-bounded organelle;GO:0031090//organelle membrane;GO:0005789//endoplasmic reticulum membrane	GO:0020037//heme binding;GO:0005506//iron ion binding;GO:0008387//steroid 7-alpha-hydroxylase activity;GO:0008396//oxysterol 7-alpha-hydroxylase activity	GO:0030573//bile acid catabolic process;GO:0007586//digestion;GO:0006707//cholesterol catabolic process;GO:0006699//bile acid biosynthetic process	K07439//24-hydroxycholesterol 7alpha-hydroxylase [EC:1.14.14.26]	EDL23412.1//cytochrome P450, family 39, subfamily a, polypeptide 1, isoform CRA_b, partial [Mus musculus];NP_061375.1//24-hydroxycholesterol 7-alpha-hydroxylase isoform 1 [Mus musculus];NP_001272876.1//24-hydroxycholesterol 7-alpha-hydroxylase isoform 2 [Mus musculus]
117146	Ube3b	5191	1191.12	578.423	-1.04212	1.40297e-09	Down	6.42387e-12	GO:0005737//cytoplasm	GO:0061630//ubiquitin protein ligase activity;GO:0004842//ubiquitin-protein transferase activity;GO:0016874//ligase activity	NA	K10588//ubiquitin-protein ligase E3 B [EC:2.3.2.26]	NP_473434.2//ubiquitin-protein ligase E3B isoform 1 [Mus musculus]
225049	Ttc7	4615	1156.63	561.81	-1.04177	0.000308337	Down	7.379e-06	GO:0005623//cell	NA	GO:0006879//cellular iron ion homeostasis;GO:0072659//protein localization to plasma membrane;GO:0030097//hemopoiesis	K21843//tetratricopeptide repeat protein 7	EDL38630.1//tetratricopeptide repeat domain 7, partial [Mus musculus]
103694	Tmed4	1645	946.815	460.108	-1.04111	1.69442e-12	Down	3.31023e-15	GO:0070062//extracellular exosome;GO:0016021//integral component of membrane;GO:0005789//endoplasmic reticulum membrane	GO:0004871//signal transducer activity	GO:0006810//transport;GO:0043123//positive regulation of I-kappaB kinase/NF-kappaB signaling;GO:0015031//protein transport	K20346//p24 family protein alpha	NP_598781.1//transmembrane emp24 domain-containing protein 4 precursor [Mus musculus]
20747	Spop	2882	1920.11	933.108	-1.04107	3.36764e-09	Down	1.80923e-11	GO:0005634//nucleus;GO:0016607//nuclear speck;GO:0031463//Cul3-RING ubiquitin ligase complex	GO:0031625//ubiquitin protein ligase binding;GO:0001085//RNA polymerase II transcription factor binding	GO:2000676//positive regulation of type B pancreatic cell apoptotic process;GO:0000122//negative regulation of transcription from RNA polymerase II promoter;GO:1902237//positive regulation of endoplasmic reticulum stress-induced intrinsic apoptotic signaling pathway;GO:0043161//proteasome-mediated ubiquitin-dependent protein catabolic process;GO:0043433//negative regulation of DNA binding transcr…	K10523//speckle-type POZ protein	EDL15982.1//speckle-type POZ protein, isoform CRA_b, partial [Mus musculus]
231287	Atp10d	6021	541.726	263.579	-1.03933	0.00351111	Down	0.000138087	GO:0016021//integral component of membrane;GO:0005789//endoplasmic reticulum membrane;GO:0005886//plasma membrane	GO:0000287//magnesium ion binding;GO:0005524//ATP binding;GO:0004012//phospholipid-translocating ATPase activity	GO:0006812//cation transport	K01530//phospholipid-translocating ATPase [EC:3.6.3.1]	NP_700438.3//probable phospholipid-transporting ATPase VD precursor [Mus musculus]
71776	Tha1	1840	150.973	73.4863	-1.03874	0.000373828	Down	9.15171e-06	GO:0005829//cytosol	GO:0008732//L-allo-threonine aldolase activity	GO:0006567//threonine catabolic process;GO:0006545//glycine biosynthetic process	K01620//threonine aldolase [EC:4.1.2.48]	NP_082195.2//threonine aldolase 1 [Mus musculus]
209354	Eif2b1	1938	311.248	151.827	-1.03564	7.34928e-07	Down	7.26852e-09	GO:0016020//membrane;GO:0005851//eukaryotic translation initiation factor 2B complex;GO:0005886//plasma membrane;GO:0005737//cytoplasm	GO:0003743//translation initiation factor activity;GO:0042802//identical protein binding;GO:0005085//guanyl-nucleotide exchange factor activity	GO:0006413//translational initiation;GO:0051716//cellular response to stimulus;GO:0014003//oligodendrocyte development	K03239//translation initiation factor eIF-2B subunit alpha	NP_663346.1//translation initiation factor eIF-2B subunit alpha [Mus musculus]
72999	Insig2	2475	11525.4	5622.31	-1.03559	0.00332805	Down	0.000129424	GO:0005783//endoplasmic reticulum;GO:0032937//SREBP-SCAP-Insig complex	GO:0008134//transcription factor binding	GO:0033993//response to lipid;GO:0016126//sterol biosynthetic process;GO:0008203//cholesterol metabolic process;GO:0006641//triglyceride metabolic process;GO:0032868//response to insulin;GO:0010894//negative regulation of steroid biosynthetic process;GO:0006695//cholesterol biosynthetic process;GO:0032933//SREBP signaling pathway;GO:0060363//cranial suture morphogenesis;GO:0006991//response to st…	NA	XP_021501151.1//insulin-induced gene 2 protein isoform X2 [Meriones unguiculatus];EDL39789.1//insulin induced gene 2, isoform CRA_a, partial [Mus musculus]
17968	Ncam2	4213	81.9739	40.2133	-1.02749	0.044412	Down	0.00344071	GO:0030424//axon;GO:0016604//nuclear body;GO:0016021//integral component of membrane;GO:0005886//plasma membrane;GO:0031225//anchored component of membrane	GO:0042802//identical protein binding	GO:0007413//axonal fasciculation;GO:0007608//sensory perception of smell;GO:0007155//cell adhesion	K06491//neural cell adhesion molecule	NP_001106679.1//neural cell adhesion molecule 2 isoform a precursor [Mus musculus];NP_035084.1//neural cell adhesion molecule 2 isoform b precursor [Mus musculus]
69823	Fyttd1	4397	391.015	191.946	-1.02652	3.47003e-06	Down	4.17336e-08	GO:0005654//nucleoplasm;GO:0016607//nuclear speck	GO:0003723//RNA binding;GO:0003729//mRNA binding	GO:0006406//mRNA export from nucleus	NA	NP_001152821.1//UAP56-interacting factor isoform 2 [Mus musculus];NP_081502.2//UAP56-interacting factor isoform 1 [Mus musculus]
94219	Cnnm2	3330	298.367	146.555	-1.02565	0.000132183	Down	2.75986e-06	GO:0043231//intracellular membrane-bounded organelle;GO:0016323//basolateral plasma membrane;GO:0016021//integral component of membrane;GO:0005886//plasma membrane	GO:0005524//ATP binding;GO:0015095//magnesium ion transmembrane transporter activity	GO:0015693//magnesium ion transport;GO:0010960//magnesium ion homeostasis	K16302//metal transporter CNNM	EDL42018.1//cyclin M2, isoform CRA_a, partial [Mus musculus]
16918	Mycl	3396	415.42	204.502	-1.02246	0.000647417	Down	1.81419e-05	GO:0005634//nucleus	GO:0003677//DNA binding;GO:0003700//DNA binding transcription factor activity;GO:0046983//protein dimerization activity	GO:0045607//regulation of inner ear auditory receptor cell differentiation	K09110//L-myc proto-oncogene protein	NP_001290050.1//protein L-Myc isoform 2 [Mus musculus];EDL30393.1//v-myc myelocytomatosis viral oncogene homolog 1, lung carcinoma derived (avian), isoform CRA_a, partial [Mus musculus]
628308	Zfp970	4664	3117.93	1535.05	-1.0223	6.1411e-07	Down	5.92364e-09	GO:0005634//nucleus;GO:0005622//intracellular	GO:0046872//metal ion binding;GO:0003700//DNA binding transcription factor activity;GO:0003676//nucleic acid binding	GO:0006355//regulation of transcription, DNA-templated	K09228//KRAB domain-containing zinc finger protein	NP_001171039.1//KRAB box and zinc finger C2H2 type domain containing protein-like [Mus musculus]
214804	Syde2	5495	203.179	100.198	-1.0199	0.00868171	Down	0.000422955	GO:0005737//cytoplasm	NA	GO:0043087//regulation of GTPase activity;GO:0007165//signal transduction	K20655//Rho GTPase-activating protein SYDE	XP_006501355.2//PREDICTED: rho GTPase-activating protein SYDE2 isoform X1 [Mus musculus]
234724	Tat	2377	19301.3	9546.92	-1.01559	0.0349752	Down	0.00255374	GO:0005739//mitochondrion	GO:0080130//L-phenylalanine:2-oxoglutarate aminotransferase activity;GO:0016597//amino acid binding;GO:0004838//L-tyrosine:2-oxoglutarate aminotransferase activity;GO:0030170//pyridoxal phosphate binding	GO:0006979//response to oxidative stress;GO:0006536//glutamate metabolic process;GO:0006572//tyrosine catabolic process;GO:0046689//response to mercury ion;GO:0009058//biosynthetic process;GO:0006103//2-oxoglutarate metabolic process;GO:0051384//response to glucocorticoid;GO:0006559//L-phenylalanine catabolic process	K00815//tyrosine aminotransferase [EC:2.6.1.5]	NP_666326.1//tyrosine aminotransferase [Mus musculus]
74022	Glyr1	3354	1579.06	783.293	-1.01145	3.4225e-16	Down	3.08016e-19	NA	NA	NA	K00020//3-hydroxyisobutyrate dehydrogenase [EC:1.1.1.31];K18121//glyoxylate/succinic semialdehyde reductase [EC:1.1.1.79 1.1.1.-]	XP_008844777.2//PREDICTED: putative oxidoreductase GLYR1 isoform X2 [Nannospalax galili];XP_008844772.2//PREDICTED: putative oxidoreductase GLYR1 isoform X1 [Nannospalax galili]
12614	Celsr1	11050	1317.33	653.872	-1.01054	1.37584e-09	Down	6.21566e-12	NA	NA	NA	K04600//cadherin EGF LAG seven-pass G-type receptor 1	XP_006520442.1//PREDICTED: cadherin EGF LAG seven-pass G-type receptor 1 isoform X1 [Mus musculus]
19139	Prps1	1998	512.805	254.548	-1.01047	0.000105491	Down	2.09952e-06	GO:0002189//ribose phosphate diphosphokinase complex;GO:0043234//protein complex;GO:0005829//cytosol	GO:0000287//magnesium ion binding;GO:0004749//ribose phosphate diphosphokinase activity;GO:0005524//ATP binding;GO:0042802//identical protein binding;GO:0019003//GDP binding;GO:0016208//AMP binding;GO:0016301//kinase activity;GO:0042803//protein homodimerization activity;GO:0043531//ADP binding;GO:0030246//carbohydrate binding	GO:0031100//animal organ regeneration;GO:0007399//nervous system development;GO:0046101//hypoxanthine biosynthetic process;GO:0009116//nucleoside metabolic process;GO:0009165//nucleotide biosynthetic process;GO:0006167//AMP biosynthetic process;GO:0019693//ribose phosphate metabolic process;GO:0006221//pyrimidine nucleotide biosynthetic process;GO:0006144//purine nucleobase metabolic process;GO:0…	K00948//ribose-phosphate pyrophosphokinase [EC:2.7.6.1]	ELR51492.1//Ribose-phosphate pyrophosphokinase 1, partial [Bos mutus]
16658	Mafb	3389	527.6	262.022	-1.00976	0.0193672	Down	0.00118828	GO:0005634//nucleus;GO:0005667//transcription factor complex	GO:0000981//RNA polymerase II transcription factor activity, sequence-specific DNA binding;GO:0000978//RNA polymerase II proximal promoter sequence-specific DNA binding;GO:0003677//DNA binding;GO:0046982//protein heterodimerization activity;GO:0001077//transcriptional activator activity, RNA polymerase II proximal promoter sequence-specific DNA binding;GO:0008134//transcription factor binding;GO:…	GO:0007399//nervous system development;GO:0045671//negative regulation of osteoclast differentiation;GO:0007585//respiratory gaseous exchange;GO:0006355//regulation of transcription, DNA-templated;GO:0021599//abducens nerve formation;GO:0048538//thymus development;GO:0035284//brain segmentation;GO:0033077//T cell differentiation in thymus;GO:0021572//rhombomere 6 development;GO:0006357//regulatio…	K09036//transcription factor MAFB	XP_019604631.1//PREDICTED: transcription factor MafB [Rhinolophus sinicus]
16194	Il6ra	3343	633.871	314.949	-1.00907	0.011426	Down	0.000606175	GO:0005615//extracellular space;GO:0009986//cell surface;GO:0016324//apical plasma membrane;GO:0016021//integral component of membrane;GO:0005896//interleukin-6 receptor complex;GO:0005576//extracellular region;GO:0070110//ciliary neurotrophic factor receptor complex	GO:0004897//ciliary neurotrophic factor receptor activity;GO:0005138//interleukin-6 receptor binding;GO:0004915//interleukin-6 receptor activity;GO:0070119//ciliary neurotrophic factor binding;GO:0004896//cytokine receptor activity;GO:0042803//protein homodimerization activity;GO:0019981//interleukin-6 binding;GO:0019899//enzyme binding	GO:0050731//positive regulation of peptidyl-tyrosine phosphorylation;GO:0032755//positive regulation of interleukin-6 production;GO:0010536//positive regulation of activation of Janus kinase activity;GO:0032966//negative regulation of collagen biosynthetic process;GO:0070120//ciliary neurotrophic factor-mediated signaling pathway;GO:0034097//response to cytokine;GO:0031018//endocrine pancreas dev…	K05055//interleukin 6 receptor	NP_034689.2//interleukin-6 receptor subunit alpha isoform 1 precursor [Mus musculus]
16363	Irf2	2484	1663.65	827.733	-1.00711	0.015886	Down	0.000915532	GO:0005654//nucleoplasm;GO:0005925//focal adhesion;GO:0005829//cytosol	GO:0001228//transcriptional activator activity, RNA polymerase II transcription regulatory region sequence-specific DNA binding;GO:0003677//DNA binding;GO:0000977//RNA polymerase II regulatory region sequence-specific DNA binding;GO:0003700//DNA binding transcription factor activity	GO:0008283//cell proliferation;GO:0006355//regulation of transcription, DNA-templated;GO:0045944//positive regulation of transcription from RNA polymerase II promoter;GO:0051607//defense response to virus	K10153//interferon regulatory factor 2	XP_011240477.1//PREDICTED: interferon regulatory factor 2 isoform X1 [Mus musculus]
11720	Mat1a	3486	79953.2	39824.8	-1.00549	0.0440833	Down	0.00340986	GO:0005829//cytosol;GO:0016363//nuclear matrix	GO:0000287//magnesium ion binding;GO:0043531//ADP binding;GO:0046872//metal ion binding;GO:0016597//amino acid binding;GO:0005524//ATP binding;GO:0042802//identical protein binding;GO:0004478//methionine adenosyltransferase activity;GO:0042803//protein homodimerization activity;GO:0046983//protein dimerization activity	GO:0051289//protein homotetramerization;GO:0009087//methionine catabolic process;GO:0006730//one-carbon metabolic process;GO:0051262//protein tetramerization;GO:0051260//protein homooligomerization;GO:0006556//S-adenosylmethionine biosynthetic process	K00789//S-adenosylmethionine synthetase [EC:2.5.1.6]	NP_598414.1//S-adenosylmethionine synthase isoform type-1 [Mus musculus]
56369	Apip	924	428.877	214.177	-1.00176	0.000386758	Down	9.60991e-06	GO:0005737//cytoplasm	GO:0042802//identical protein binding;GO:0008270//zinc ion binding;GO:0046570//methylthioribulose 1-phosphate dehydratase activity	GO:0070269//pyroptosis;GO:0051289//protein homotetramerization;GO:0070372//regulation of ERK1 and ERK2 cascade;GO:0019284//L-methionine salvage from S-adenosylmethionine;GO:0043066//negative regulation of apoptotic process;GO:0019509//L-methionine salvage from methylthioadenosine;GO:0006915//apoptotic process	K08964//methylthioribulose-1-phosphate dehydratase [EC:4.2.1.109]	NP_062709.3//methylthioribulose-1-phosphate dehydratase isoform 1 [Mus musculus]
15007	H2-Q10	1473	17960.2	8973.71	-1.00103	1.82079e-06	Down	2.01198e-08	GO:0016020//membrane;GO:0070062//extracellular exosome;GO:0070971//endoplasmic reticulum exit site;GO:0005783//endoplasmic reticulum;GO:0009897//external side of plasma membrane;GO:0030670//phagocytic vesicle membrane;GO:0005797//Golgi medial cisterna;GO:0009986//cell surface;GO:0071556//integral component of lumenal side of endoplasmic reticulum membrane;GO:0042612//MHC class I protein complex;G…	GO:0003723//RNA binding;GO:0046977//TAP binding;GO:0030881//beta-2-microglobulin binding;GO:0042605//peptide antigen binding;GO:0005102//receptor binding;GO:0042608//T cell receptor binding	GO:0010977//negative regulation of neuron projection development;GO:0001916//positive regulation of T cell mediated cytotoxicity;GO:0006955//immune response;GO:0002474//antigen processing and presentation of peptide antigen via MHC class I;GO:0002485//antigen processing and presentation of endogenous peptide antigen via MHC class I via ER pathway, TAP-dependent	K06751//major histocompatibility complex, class I	XP_021010515.1//LOW QUALITY PROTEIN: H-2 class I histocompatibility antigen, Q10 alpha chain-like [Mus caroli]
269423	Abhd18	2492	134.298	269.18	1.00313	0.000106936	Up	2.14134e-06	GO:0005576//extracellular region	NA	NA	NA	NP_080898.2//protein ABHD18 precursor [Mus musculus]
71751	Map3k13	6709	119.541	240.208	1.00678	0.0353754	Up	0.00259592	GO:0016020//membrane;GO:0008385//IkappaB kinase complex	GO:0046872//metal ion binding;GO:0004709//MAP kinase kinase kinase activity;GO:0004674//protein serine/threonine kinase activity;GO:0005524//ATP binding;GO:0042802//identical protein binding;GO:0042803//protein homodimerization activity	GO:0051092//positive regulation of NF-kappaB transcription factor activity;GO:0006468//protein phosphorylation;GO:0046777//protein autophosphorylation;GO:0007254//JNK cascade;GO:0000186//activation of MAPKK activity	K04422//mitogen-activated protein kinase kinase kinase 13 [EC:2.7.11.25]	NP_766409.2//mitogen-activated protein kinase kinase kinase 13 [Mus musculus]
242425	Gabbr2	3998	66.1186	133.059	1.00894	0.00126108	Up	3.94955e-05	GO:0030425//dendrite;GO:0030054//cell junction;GO:0038039//G-protein coupled receptor heterodimeric complex;GO:0005737//cytoplasm;GO:0043204//perikaryon;GO:0043005//neuron projection;GO:0005887//integral component of plasma membrane;GO:0016021//integral component of membrane;GO:1902710//GABA receptor complex;GO:0045211//postsynaptic membrane	GO:0004965//G-protein coupled GABA receptor activity;GO:0046982//protein heterodimerization activity	GO:0007214//gamma-aminobutyric acid signaling pathway	K04615//gamma-aminobutyric acid type B receptor	NP_001074610.1//gamma-aminobutyric acid type B receptor subunit 2 precursor [Mus musculus]
74114	Crot	2803	1847.41	3722.85	1.0109	2.04607e-12	Up	4.12212e-15	GO:0043231//intracellular membrane-bounded organelle;GO:0005777//peroxisome;GO:0005739//mitochondrion	GO:0008458//carnitine O-octanoyltransferase activity;GO:0005102//receptor binding	GO:0006635//fatty acid beta-oxidation;GO:0015908//fatty acid transport;GO:0009437//carnitine metabolic process;GO:0006631//fatty acid metabolic process;GO:0006091//generation of precursor metabolites and energy;GO:0015936//coenzyme A metabolic process;GO:0051791//medium-chain fatty acid metabolic process	K05940//carnitine O-octanoyltransferase [EC:2.3.1.137]	NP_076222.1//peroxisomal carnitine O-octanoyltransferase [Mus musculus]
218952	Fermt2	3243	1371.62	2766.27	1.01206	1.00365e-07	Up	7.90418e-10	GO:0005856//cytoskeleton;GO:0005634//nucleus;GO:0005654//nucleoplasm;GO:0005925//focal adhesion;GO:0005938//cell cortex;GO:0005737//cytoplasm;GO:0031258//lamellipodium membrane;GO:0001725//stress fiber;GO:0009986//cell surface;GO:0031234//extrinsic component of cytoplasmic side of plasma membrane;GO:0031674//I band;GO:0031941//filamentous actin	GO:0005547//phosphatidylinositol-3,4,5-trisphosphate binding	GO:0034446//substrate adhesion-dependent cell spreading;GO:0072657//protein localization to membrane;GO:0008360//regulation of cell shape;GO:0033622//integrin activation;GO:0007160//cell-matrix adhesion;GO:0007179//transforming growth factor beta receptor signaling pathway;GO:0016055//Wnt signaling pathway;GO:0007229//integrin-mediated signaling pathway;GO:0048041//focal adhesion assembly	K17083//kindlin 2	NP_666166.2//fermitin family homolog 2 [Mus musculus]
21928	Tnfaip2	3590	162.867	329.4	1.01615	0.0161448	Up	0.00093537	GO:0000145//exocyst	GO:0000149//SNARE binding	GO:0030154//cell differentiation;GO:0001525//angiogenesis;GO:0051601//exocyst localization;GO:0006887//exocytosis	K19989//tumor necrosis factor alpha-induced protein 2	NP_033422.2//tumor necrosis factor alpha-induced protein 2 [Mus musculus]
70113	Odf3b	1075	134.407	272.294	1.01855	0.0170579	Up	0.00100598	NA	NA	NA	NA	NP_001013040.1//outer dense fiber protein 3B [Mus musculus]
66120	Fkbp11	799	221.818	450.323	1.02158	0.00334567	Up	0.000130314	GO:0016020//membrane;GO:0016021//integral component of membrane;GO:0005737//cytoplasm	GO:0003755//peptidyl-prolyl cis-trans isomerase activity;GO:0005528//FK506 binding	GO:0061077//chaperone-mediated protein folding	K09576//FK506-binding protein 11 [EC:5.2.1.8]	NP_077131.2//peptidyl-prolyl cis-trans isomerase FKBP11 precursor [Mus musculus]
21401	Tcea3	1247	817.6	1667.65	1.02835	0.000123876	Up	2.52592e-06	GO:0005634//nucleus	GO:0003677//DNA binding;GO:0008270//zinc ion binding	GO:0006355//regulation of transcription, DNA-templated;GO:0006351//transcription, DNA-templated	K03145//transcription elongation factor S-II	NP_035672.1//transcription elongation factor A protein 3 [Mus musculus]
11944	Atp4a	3497	36.6694	75.1228	1.03467	0.0135917	Up	0.000748458	GO:0016021//integral component of membrane	GO:0005391//sodium:potassium-exchanging ATPase activity;GO:0046872//metal ion binding;GO:0005524//ATP binding	NA	K01542//H+/K+-exchanging ATPase alpha polypeptide [EC:3.6.3.10]	XP_020832639.1//potassium-transporting ATPase alpha chain 1 [Phascolarctos cinereus];XP_017518852.1//PREDICTED: potassium-transporting ATPase alpha chain 1 [Manis javanica]
16149	Cd74	1276	169.627	348.226	1.03765	0.0206232	Up	0.00128419	GO:0070062//extracellular exosome;GO:0005783//endoplasmic reticulum;GO:0042613//MHC class II protein complex;GO:0009897//external side of plasma membrane;GO:0005764//lysosome;GO:0009986//cell surface;GO:0035692//macrophage migration inhibitory factor receptor complex;GO:0035693//NOS2-CD74 complex;GO:0005794//Golgi apparatus;GO:0005771//multivesicular body;GO:0016021//integral component of membrane	GO:0042289//MHC class II protein binding;GO:0042609//CD4 receptor binding;GO:0035718//macrophage migration inhibitory factor binding;GO:0050998//nitric-oxide synthase binding;GO:0019955//cytokine binding;GO:0001540//amyloid-beta binding;GO:0004896//cytokine receptor activity;GO:0042658//MHC class II protein binding, via antigen binding groove;GO:0044183//protein binding involved in protein folding	GO:0050731//positive regulation of peptidyl-tyrosine phosphorylation;GO:0016064//immunoglobulin mediated immune response;GO:0002606//positive regulation of dendritic cell antigen processing and presentation;GO:0045060//negative thymic T cell selection;GO:0030890//positive regulation of B cell proliferation;GO:0045581//negative regulation of T cell differentiation;GO:0001516//prostaglandin biosynt…	K06505//CD74 antigen	NP_001036070.1//H-2 class II histocompatibility antigen gamma chain isoform 1 [Mus musculus];NP_034675.1//H-2 class II histocompatibility antigen gamma chain isoform 2 [Mus musculus]
15493	Hsd3b2	1810	206.19	425.878	1.04647	0.0289642	Up	0.00199107	GO:0005758//mitochondrial intermembrane space;GO:0005743//mitochondrial inner membrane;GO:0016021//integral component of membrane;GO:0005789//endoplasmic reticulum membrane	GO:0102294//cholesterol dehydrogenase activity;GO:0004769//steroid delta-isomerase activity;GO:0003854//3-beta-hydroxy-delta5-steroid dehydrogenase activity	GO:0006694//steroid biosynthetic process	K00070//3beta-hydroxy-Delta5-steroid dehydrogenase / steroid Delta-isomerase [EC:1.1.1.145 5.3.3.1]	EDL38970.1//mCG140534, isoform CRA_b, partial [Mus musculus]
229003	Helz2	10124	556.374	1149.44	1.0468	1.5864e-07	Up	1.29779e-09	NA	GO:0030374//ligand-dependent nuclear receptor transcription coactivator activity	NA	K14326//regulator of nonsense transcripts 1 [EC:3.6.4.-]	XP_006500664.1//PREDICTED: helicase with zinc finger domain 2 isoform X3 [Mus musculus]
399603	Lratd2	5563	607.45	1257.69	1.04994	0.000667231	Up	1.89008e-05	GO:0005886//plasma membrane;GO:0005737//cytoplasm	NA	NA	K10461//kelch-like protein 24/35;K16817//HRAS-like suppressor 3 [EC:3.1.1.32 3.1.1.4]	NP_001156398.1//protein FAM84B [Mus musculus]
224530	Acat3	1991	2224.78	4611.4	1.05154	6.80324e-10	Up	2.6997e-12	GO:0070062//extracellular exosome;GO:0005634//nucleus;GO:0005730//nucleolus;GO:0005829//cytosol;GO:0005739//mitochondrion;GO:0005737//cytoplasm	GO:0003985//acetyl-CoA C-acetyltransferase activity	GO:0006635//fatty acid beta-oxidation;GO:0045797//positive regulation of intestinal cholesterol absorption	K00626//acetyl-CoA C-acetyltransferase [EC:2.3.1.9]	NP_694791.2//acetyl-Coenzyme A acetyltransferase 3 [Mus musculus]
16691	Krt8	1805	2258.65	4685.72	1.05281	0.00481682	Up	0.000203495	GO:0070062//extracellular exosome;GO:0005634//nucleus;GO:0005654//nucleoplasm;GO:0016327//apicolateral plasma membrane;GO:0045111//intermediate filament cytoskeleton;GO:0043034//costamere;GO:0071944//cell periphery;GO:0016363//nuclear matrix;GO:0005882//intermediate filament;GO:0005737//cytoplasm;GO:0030018//Z disc;GO:0005911//cell-cell junction;GO:0042383//sarcolemma;GO:0045095//keratin filament…	GO:0097110//scaffold protein binding;GO:0005198//structural molecule activity;GO:0032403//protein complex binding	GO:0097284//hepatocyte apoptotic process;GO:0097191//extrinsic apoptotic signaling pathway;GO:0045214//sarcomere organization;GO:0051599//response to hydrostatic pressure;GO:0060706//cell differentiation involved in embryonic placenta development;GO:0007275//multicellular organism development;GO:0051707//response to other organism;GO:0033209//tumor necrosis factor-mediated signaling pathway;GO:00…	K07605//type II keratin, basic	NP_112447.2//keratin, type II cytoskeletal 8 [Mus musculus]
16822	Lcp2	3348	27.6366	58.3495	1.07814	0.033874	Up	0.00245266	GO:0005829//cytosol;GO:0005911//cell-cell junction;GO:0044853//plasma membrane raft;GO:0036398//TCR signalosome	NA	GO:0007169//transmembrane receptor protein tyrosine kinase signaling pathway;GO:0050663//cytokine secretion;GO:0050852//T cell receptor signaling pathway;GO:0045860//positive regulation of protein kinase activity;GO:0045576//mast cell activation;GO:0006955//immune response;GO:0035556//intracellular signal transduction	K07361//lymphocyte cytosolic protein 2	NP_034826.2//lymphocyte cytosolic protein 2 [Mus musculus]
53322	Nucb2	1703	75.3998	159.195	1.07816	0.0174403	Up	0.00103279	GO:0070062//extracellular exosome;GO:0005634//nucleus;GO:0005615//extracellular space;GO:0005783//endoplasmic reticulum;GO:0005793//endoplasmic reticulum-Golgi intermediate compartment;GO:0005737//cytoplasm;GO:0043204//perikaryon;GO:0005794//Golgi apparatus;GO:0005640//nuclear outer membrane	GO:0003677//DNA binding;GO:0005509//calcium ion binding	GO:0006874//cellular calcium ion homeostasis	K20371//nucleobindin	NP_001123951.1//nucleobindin-2 precursor [Mus musculus]
11806	Apoa1	988	87407.1	184971	1.08148	0.0486883	Up	0.00386117	GO:0009986//cell surface;GO:0072562//blood microparticle;GO:0042627//chylomicron;GO:0031410//cytoplasmic vesicle	GO:0034191//apolipoprotein A-I receptor binding;GO:0001540//amyloid-beta binding;GO:0045499//chemorepellent activity;GO:0034190//apolipoprotein receptor binding	GO:0031100//animal organ regeneration;GO:0030325//adrenal gland development;GO:0006695//cholesterol biosynthetic process;GO:0043534//blood vessel endothelial cell migration	K08757//apolipoprotein A-I	NP_033822.2//apolipoprotein A-I preproprotein [Mus musculus]
66116	Nat8f1	1027	499.033	1065.53	1.09436	0.0200809	Up	0.00123575	GO:0005783//endoplasmic reticulum;GO:0005794//Golgi apparatus;GO:0005743//mitochondrial inner membrane;GO:0016021//integral component of membrane;GO:0033116//endoplasmic reticulum-Golgi intermediate compartment membrane;GO:0005793//endoplasmic reticulum-Golgi intermediate compartment;GO:0005789//endoplasmic reticulum membrane	GO:0008080//N-acetyltransferase activity;GO:0004468//lysine N-acetyltransferase activity, acting on acetyl phosphate as donor	GO:0050435//amyloid-beta metabolic process;GO:0001702//gastrulation with mouth forming second;GO:0018003//peptidyl-lysine N6-acetylation;GO:0007162//negative regulation of cell adhesion;GO:0043066//negative regulation of apoptotic process;GO:0010628//positive regulation of gene expression	K20838//N-acetyltransferase 8 [EC:2.3.1.80 2.3.1.-]	NP_075649.2//probable N-acetyltransferase CML1 [Mus musculus]
20410	Sorbs3	2483	224.806	481.569	1.09907	1.75493e-05	Up	2.65704e-07	GO:0005856//cytoskeleton;GO:0005634//nucleus;GO:0005925//focal adhesion;GO:0005737//cytoplasm	GO:0017166//vinculin binding;GO:0008134//transcription factor binding	GO:0000122//negative regulation of transcription from RNA polymerase II promoter;GO:0007155//cell adhesion;GO:0051496//positive regulation of stress fiber assembly;GO:0007015//actin filament organization;GO:0043410//positive regulation of MAPK cascade;GO:0031589//cell-substrate adhesion	K06086//sorbin and SH3 domain containing 1	NP_035496.1//vinexin isoform a [Mus musculus]
17069	Ly6e	1927	6561.94	14084.7	1.10193	3.15379e-07	Up	2.86883e-09	GO:0016021//integral component of membrane;GO:0005886//plasma membrane;GO:0031225//anchored component of membrane	GO:0030550//acetylcholine receptor inhibitor activity;GO:0033130//acetylcholine receptor binding	GO:0035265//organ growth;GO:0095500//acetylcholine receptor signaling pathway;GO:0030325//adrenal gland development;GO:0055010//ventricular cardiac muscle tissue morphogenesis;GO:0001701//in utero embryonic development;GO:0048242//epinephrine secretion;GO:0042415//norepinephrine metabolic process	K06846//lymphocyte antigen 6 complex locus protein D/E/G6/H	NP_032555.1//lymphocyte antigen 6E precursor [Mus musculus]
110454	Ly6a	963	63.3238	137.345	1.11699	0.000392818	Up	9.78448e-06	GO:0009897//external side of plasma membrane;GO:0005622//intracellular;GO:0031225//anchored component of membrane	NA	NA	K06846//lymphocyte antigen 6 complex locus protein D/E/G6/H	EDL29471.1//lymphocyte antigen 6 complex, locus A, isoform CRA_b, partial [Mus musculus]
71706	Slc46a3	2421	630.71	1382.73	1.13247	1.58879e-06	Up	1.71683e-08	NA	NA	NA	K20840//MFS transporter, PCFT/HCP family, solute carrier family 46, member 3	EDL05842.1//RIKEN cDNA 1200006F02, partial [Mus musculus]
68680	Fitm1	912	63.7538	139.92	1.13402	0.000398067	Up	9.96383e-06	GO:0030176//integral component of endoplasmic reticulum membrane;GO:0016021//integral component of membrane;GO:0005789//endoplasmic reticulum membrane	NA	GO:0008654//phospholipid biosynthetic process;GO:0019915//lipid storage;GO:0010890//positive regulation of sequestering of triglyceride;GO:0034389//lipid particle organization	K11801//WD repeat-containing protein 23	AAH37188.1//1110028A07Rik protein, partial [Mus musculus]
18186	Nrp1	5921	480.217	1054.24	1.13445	9.01694e-05	Up	1.73953e-06	GO:0030424//axon;GO:0009986//cell surface;GO:0005829//cytosol;GO:0005769//early endosome	GO:0046872//metal ion binding;GO:0008201//heparin binding;GO:0019838//growth factor binding;GO:0005096//GTPase activator activity	GO:0060978//angiogenesis involved in coronary vascular morphogenesis;GO:0031532//actin cytoskeleton reorganization;GO:0048844//artery morphogenesis;GO:0001525//angiogenesis	K06724//neuropilin 1	NP_032763.2//neuropilin-1 precursor [Mus musculus]
14858	Gsta2	855	400.444	879.576	1.13521	1.30373e-06	Up	1.38492e-08	GO:0070062//extracellular exosome;GO:0005829//cytosol	GO:0004364//glutathione transferase activity	GO:0006749//glutathione metabolic process;GO:0008152//metabolic process;GO:0035634//response to stilbenoid	K00799//glutathione S-transferase [EC:2.5.1.18]	NP_032208.2//glutathione S-transferase A2 [Mus musculus]
14629	Gclc	3442	2528.18	5578.03	1.14166	9.59417e-06	Up	1.33545e-07	GO:0005829//cytosol;GO:0017109//glutamate-cysteine ligase complex	GO:0000287//magnesium ion binding;GO:0016595//glutamate binding;GO:0043531//ADP binding;GO:0005524//ATP binding;GO:0046982//protein heterodimerization activity;GO:0004357//glutamate-cysteine ligase activity;GO:0050662//coenzyme binding	GO:0071260//cellular response to mechanical stimulus;GO:0050880//regulation of blood vessel size;GO:0032436//positive regulation of proteasomal ubiquitin-dependent protein catabolic process;GO:0045454//cell redox homeostasis;GO:0070555//response to interleukin-1;GO:0046685//response to arsenic-containing substance;GO:0044752//response to human chorionic gonadotropin;GO:2000490//negative regulatio…	K11204//glutamate--cysteine ligase catalytic subunit [EC:6.3.2.2]	NP_034425.1//glutamate--cysteine ligase catalytic subunit [Mus musculus]
54326	Elovl2	3837	2021.92	4469.91	1.14452	5.92518e-09	Up	3.40028e-11	GO:0005783//endoplasmic reticulum;GO:0030176//integral component of endoplasmic reticulum membrane;GO:0016021//integral component of membrane;GO:0005789//endoplasmic reticulum membrane	GO:0009922//fatty acid elongase activity;GO:0102336//3-oxo-arachidoyl-CoA synthase activity;GO:0102756//very-long-chain 3-ketoacyl-CoA synthase activity;GO:0102337//3-oxo-cerotoyl-CoA synthase activity;GO:0016747//transferase activity, transferring acyl groups other than amino-acyl groups;GO:0102338//3-oxo-lignoceronyl-CoA synthase activity	GO:0019367//fatty acid elongation, saturated fatty acid;GO:0000038//very long-chain fatty acid metabolic process;GO:0006636//unsaturated fatty acid biosynthetic process;GO:0034626//fatty acid elongation, polyunsaturated fatty acid;GO:0030148//sphingolipid biosynthetic process;GO:0042761//very long-chain fatty acid biosynthetic process;GO:0034625//fatty acid elongation, monounsaturated fatty acid	K10205//elongation of very long chain fatty acids protein 2 [EC:2.3.1.199]	EDL40970.1//elongation of very long chain fatty acids (FEN1/Elo2, SUR4/Elo3, yeast)-like 2, isoform CRA_a, partial [Mus musculus]
70556	Slc25a33	1877	114.018	252.146	1.145	2.94748e-05	Up	4.85848e-07	GO:0005743//mitochondrial inner membrane;GO:0016021//integral component of membrane;GO:0005739//mitochondrion;GO:0031966//mitochondrial membrane	GO:0015218//pyrimidine nucleotide transmembrane transporter activity	GO:0071156//regulation of cell cycle arrest;GO:0030307//positive regulation of cell growth;GO:1903426//regulation of reactive oxygen species biosynthetic process;GO:0006839//mitochondrial transport;GO:1990314//cellular response to insulin-like growth factor stimulus;GO:0006390//transcription from mitochondrial promoter;GO:0034551//mitochondrial respiratory chain complex III assembly;GO:0002082//r…	K15116//solute carrier family 25, member 33/36	NP_081736.2//solute carrier family 25 member 33 [Mus musculus]
13198	Ddit3	882	54.3872	120.571	1.14854	0.000519628	Up	1.39265e-05	GO:0005634//nucleus;GO:0005770//late endosome;GO:0036488//CHOP-C/EBP complex;GO:1990622//CHOP-ATF3 complex;GO:0032993//protein-DNA complex;GO:0005737//cytoplasm;GO:1990617//CHOP-ATF4 complex	GO:0000978//RNA polymerase II proximal promoter sequence-specific DNA binding;GO:0003677//DNA binding;GO:0008140//cAMP response element binding protein binding;GO:0003714//transcription corepressor activity;GO:0046982//protein heterodimerization activity;GO:0001077//transcriptional activator activity, RNA polymerase II proximal promoter sequence-specific DNA binding;GO:0000976//transcription regu…	GO:0034976//response to endoplasmic reticulum stress;GO:0043433//negative regulation of DNA binding transcription factor activity;GO:0045454//cell redox homeostasis;GO:0090090//negative regulation of canonical Wnt signaling pathway;GO:0051898//negative regulation of protein kinase B signaling;GO:0030968//endoplasmic reticulum unfolded protein response;GO:0051259//protein oligomerization;GO:004589…	K04452//DNA damage-inducible transcript 3	EDL24495.1//DNA-damage inducible transcript 3, isoform CRA_b, partial [Mus musculus]
26897	Acot1	1559	337.238	748.358	1.14996	7.75304e-08	Up	5.86921e-10	GO:0005739//mitochondrion;GO:0005737//cytoplasm	GO:0047617//acyl-CoA hydrolase activity;GO:0102991//myristoyl-CoA hydrolase activity;GO:0052689//carboxylic ester hydrolase activity;GO:0016290//palmitoyl-CoA hydrolase activity	GO:0001676//long-chain fatty acid metabolic process;GO:0006637//acyl-CoA metabolic process	K01068//acyl-coenzyme A thioesterase 1/2/4 [EC:3.1.2.2]	NP_036136.1//acyl-coenzyme A thioesterase 1 [Mus musculus]
16391	Irf9	2408	134.8	300.62	1.15713	1.79555e-07	Up	1.50177e-09	GO:0005634//nucleus;GO:0005829//cytosol	GO:0003700//DNA binding transcription factor activity;GO:0001047//core promoter binding	GO:0045351//type I interferon biosynthetic process;GO:0006351//transcription, DNA-templated	K04693//interferon regulatory factor 9	EDL36273.1//interferon dependent positive acting transcription factor 3 gamma, isoform CRA_b, partial [Mus musculus];NP_001152889.1//interferon regulatory factor 9 isoform 1 [Mus musculus];EDL36272.1//interferon dependent positive acting transcription factor 3 gamma, isoform CRA_a, partial [Mus musculus]
67893	Tmem86a	1791	41.4741	92.5042	1.15731	0.0329149	Up	0.00236014	GO:0016021//integral component of membrane	NA	NA	K18575//alkenylglycerophosphocholine hydrolase [EC:3.3.2.2]	NP_080712.1//lysoplasmalogenase-like protein TMEM86A [Mus musculus]
75761	Apol7a	2343	695.044	1556.31	1.16295	0.000198844	Up	4.5523e-06	GO:0005576//extracellular region	GO:0008289//lipid binding	GO:0006869//lipid transport;GO:0042157//lipoprotein metabolic process	K14480//apolipoprotein L	NP_083695.2//apolipoprotein L 7a [Mus musculus]
73847	Fam110a	1711	39.0942	87.5738	1.16354	0.00171024	Up	5.81566e-05	NA	NA	NA	NA	EDL05943.1//RIKEN cDNA 5430432M24, isoform CRA_c, partial [Mus musculus];EDL05942.1//RIKEN cDNA 5430432M24, isoform CRA_b, partial [Mus musculus];EDL05944.1//RIKEN cDNA 5430432M24, isoform CRA_d, partial [Mus musculus];EDL05941.1//RIKEN cDNA 5430432M24, isoform CRA_a, partial [Mus musculus]
11307	Abcg1	5821	63.1702	141.52	1.16369	0.00830052	Up	0.000399823	GO:0005768//endosome;GO:0009897//external side of plasma membrane;GO:0005794//Golgi apparatus;GO:0016021//integral component of membrane;GO:0005739//mitochondrion;GO:0055037//recycling endosome;GO:0005886//plasma membrane	GO:0005524//ATP binding;GO:0046982//protein heterodimerization activity;GO:0017127//cholesterol transporter activity;GO:0042803//protein homodimerization activity;GO:0043531//ADP binding;GO:0019534//toxin transmembrane transporter activity;GO:0034041//sterol-transporting ATPase activity;GO:0034437//glycoprotein transporter activity;GO:0016887//ATPase activity;GO:0005548//phospholipid transporter …	GO:0010875//positive regulation of cholesterol efflux;GO:0034436//glycoprotein transport;GO:0042987//amyloid precursor protein catabolic process;GO:0008203//cholesterol metabolic process;GO:0006355//regulation of transcription, DNA-templated;GO:0034374//low-density lipoprotein particle remodeling;GO:0010872//regulation of cholesterol esterification;GO:0030301//cholesterol transport;GO:0033344//ch…	K05679//ATP-binding cassette, subfamily G (WHITE), member 1	NP_033723.1//ATP-binding cassette sub-family G member 1 [Mus musculus]
330286	D630045J12Rik	10986	73.0629	164.285	1.16899	0.00170951	Up	5.80273e-05	GO:0016021//integral component of membrane	NA	NA	K10955//mucin-2	NP_918950.2//UPF0606 protein KIAA1549 precursor [Mus musculus]
231670	Fbxo21	3909	762.388	1722.27	1.17572	2.60573e-06	Up	3.02252e-08	NA	GO:0003677//DNA binding;GO:0004842//ubiquitin-protein transferase activity	NA	K10301//F-box protein 21	EDL19801.1//F-box only protein 21, isoform CRA_a, partial [Mus musculus]
330657	Prss53	2531	57.8747	130.851	1.17691	0.000134676	Up	2.82015e-06	NA	GO:0004252//serine-type endopeptidase activity;GO:0005509//calcium ion binding	GO:0007596//blood coagulation	K09630//polyserase 2 [EC:3.4.21.-]	XP_021023196.1//serine protease 53 [Mus caroli]
239102	Zfhx2	8738	169.971	386.037	1.18345	1.23577e-05	Up	1.78047e-07	GO:0005634//nucleus	GO:0008270//zinc ion binding;GO:0043565//sequence-specific DNA binding	GO:0006355//regulation of transcription, DNA-templated;GO:0030534//adult behavior	K09379//zinc finger homeobox protein 2	NP_001034287.1//zinc finger homeobox protein 2 [Mus musculus]
60440	Iigp1	3035	2737.09	6261.31	1.19382	2.75117e-09	Up	1.42765e-11	GO:0016020//membrane	GO:0005525//GTP binding	NA	K17072//interferon gamma inducible protein 47	XP_021006322.1//interferon-inducible GTPase 1 [Mus caroli]
17388	Mmp15	4346	724.881	1669.49	1.20359	7.59053e-06	Up	1.02875e-07	GO:0031012//extracellular matrix;GO:0005887//integral component of plasma membrane	GO:0004222//metalloendopeptidase activity;GO:0008270//zinc ion binding	GO:0032355//response to estradiol;GO:0035987//endodermal cell differentiation	K07995//matrix metalloproteinase-15 (membrane-inserted) [EC:3.4.24.-]	NP_032635.1//matrix metalloproteinase-15 preproprotein [Mus musculus]
55963	Slc1a4	3926	56.2846	129.742	1.20484	0.02038	Up	0.00126287	GO:0016020//membrane;GO:0070062//extracellular exosome;GO:0030425//dendrite;GO:0009986//cell surface;GO:0016021//integral component of membrane;GO:0042470//melanosome;GO:0005882//intermediate filament;GO:0043025//neuronal cell body	GO:0015193//L-proline transmembrane transporter activity;GO:0034590//L-hydroxyproline transmembrane transporter activity;GO:0015175//neutral amino acid transmembrane transporter activity;GO:0015293//symporter activity;GO:0015195//L-threonine transmembrane transporter activity;GO:0005254//chloride channel activity;GO:0015180//L-alanine transmembrane transporter activity;GO:0015194//L-serine transm…	GO:0015826//threonine transport;GO:0015825//L-serine transport;GO:0050890//cognition;GO:0015808//L-alanine transport;GO:0034589//hydroxyproline transport;GO:0015824//proline transport	K05615//solute carrier family 1 (glutamate/neutral amino acid transporter), member 4	NP_061349.3//neutral amino acid transporter A [Mus musculus]
12055	Bcl7c	981	152.065	351.834	1.21021	1.94177e-09	Up	9.7207e-12	NA	NA	GO:0006915//apoptotic process	NA	NP_033876.1//B-cell CLL/lymphoma 7 protein family member C isoform 2 [Mus musculus]
74735	Trim14	3204	367.295	854.602	1.21831	1.49528e-06	Up	1.60666e-08	GO:0005622//intracellular;GO:0005737//cytoplasm	GO:0008270//zinc ion binding	GO:0051091//positive regulation of DNA binding transcription factor activity;GO:0051092//positive regulation of NF-kappaB transcription factor activity;GO:0032897//negative regulation of viral transcription;GO:0045087//innate immune response	K12004//tripartite motif-containing protein 14	EDL02365.1//tripartite motif-containing 14, isoform CRA_a, partial [Mus musculus]
231238	Sel1l3	4532	55.102	128.752	1.22441	0.00964344	Up	0.000482172	GO:0016021//integral component of membrane	NA	NA	K14026//SEL1 protein	EDL37673.1//RIKEN cDNA 2310045A20, isoform CRA_b, partial [Mus musculus]
378462	Morn2	662	53.0544	123.986	1.22463	0.00235402	Up	8.53049e-05	NA	NA	NA	K19755//radial spoke head protein 1	EDL38519.1//MORN repeat containing 2, isoform CRA_a, partial [Mus musculus]
16147	Ihh	2464	68.6434	160.888	1.22887	0.0151748	Up	0.000856013	GO:0005615//extracellular space;GO:0005886//plasma membrane;GO:0005578//proteinaceous extracellular matrix	GO:0046872//metal ion binding;GO:0005113//patched binding;GO:0008233//peptidase activity;GO:0005509//calcium ion binding	GO:0001649//osteoblast differentiation;GO:0060135//maternal process involved in female pregnancy;GO:0097421//liver regeneration;GO:0043010//camera-type eye development;GO:0061053//somite development;GO:0040008//regulation of growth;GO:0051216//cartilage development;GO:0032967//positive regulation of collagen biosynthetic process;GO:0048666//neuron development;GO:0007389//pattern specification pro…	K11989//indian hedgehog	AAB49692.1//Indian hedgehog protein [Mus musculus]
15494	Hsd3b3	1676	3030.62	7223.18	1.25302	0.0092332	Up	0.00045546	GO:0005758//mitochondrial intermembrane space;GO:0005743//mitochondrial inner membrane;GO:0016021//integral component of membrane;GO:0005789//endoplasmic reticulum membrane	GO:0102294//cholesterol dehydrogenase activity;GO:0004769//steroid delta-isomerase activity;GO:0003854//3-beta-hydroxy-delta5-steroid dehydrogenase activity	GO:0006694//steroid biosynthetic process	K00070//3beta-hydroxy-Delta5-steroid dehydrogenase / steroid Delta-isomerase [EC:1.1.1.145 5.3.3.1]	XP_021052176.1//3 beta-hydroxysteroid dehydrogenase/Delta 5--;NP_694873.2//3 beta-hydroxysteroid dehydrogenase/Delta 5--;XP_017174954.1//PREDICTED: 3 beta-hydroxysteroid dehydrogenase/Delta 5--
20620	Plk2	2802	98.5604	235.256	1.25515	0.000114354	Up	2.30383e-06	GO:0030425//dendrite;GO:0005814//centriole;GO:0000785//chromatin;GO:0005622//intracellular;GO:0005813//centrosome;GO:0005737//cytoplasm	GO:0004674//protein serine/threonine kinase activity;GO:0005524//ATP binding;GO:0004871//signal transducer activity;GO:0043008//ATP-dependent protein binding;GO:0032403//protein complex binding	GO:0000278//mitotic cell cycle;GO:0032436//positive regulation of proteasomal ubiquitin-dependent protein catabolic process;GO:0032092//positive regulation of protein binding;GO:0060292//long term synaptic depression;GO:0060291//long-term synaptic potentiation;GO:0046599//regulation of centriole replication;GO:0006468//protein phosphorylation;GO:0043066//negative regulation of apoptotic process;G…	K08861//polo-like kinase 2 [EC:2.7.11.21]	NP_690017.2//serine/threonine-protein kinase PLK2 [Mus musculus]
433940	Fam222a	2717	32.2856	77.1078	1.25599	0.00548044	Up	0.000239225	NA	NA	NA	K10955//mucin-2;K05746//enabled	NP_001004180.1//protein FAM222A [Mus musculus]
211550	Tifa	2164	67.7083	162.9	1.26658	0.000451196	Up	1.17069e-05	GO:0005622//intracellular	NA	GO:0007249//I-kappaB kinase/NF-kappaB signaling	NA	NP_660115.1//TRAF-interacting protein with FHA domain-containing protein A [Mus musculus]
21807	Tsc22d1	1733	1189.25	2864.81	1.26839	7.76849e-07	Up	7.73055e-09	GO:0005634//nucleus;GO:0005737//cytoplasm	GO:0000978//RNA polymerase II proximal promoter sequence-specific DNA binding;GO:0001077//transcriptional activator activity, RNA polymerase II proximal promoter sequence-specific DNA binding;GO:0003700//DNA binding transcription factor activity;GO:0046983//protein dimerization activity	GO:0043065//positive regulation of apoptotic process;GO:0045944//positive regulation of transcription from RNA polymerase II promoter;GO:0043066//negative regulation of apoptotic process;GO:0006351//transcription, DNA-templated;GO:0008284//positive regulation of cell proliferation;GO:0006366//transcription from RNA polymerase II promoter	K13908//mucin-5B;K09199//transcription factor Sp9;K21125//mucin-5AC;K15033//peptidyl-tRNA hydrolase ICT1 [EC:3.1.1.29]	NP_997535.2//TSC22 domain family protein 1 isoform 1 [Mus musculus];NP_033392.1//TSC22 domain family protein 1 isoform 2 [Mus musculus];BAE22878.1//unnamed protein product [Mus musculus]
75178	Meiob	1703	103.892	251.739	1.27685	0.0094827	Up	0.000470082	GO:0005634//nucleus;GO:0005694//chromosome;GO:0005737//cytoplasm	GO:0003697//single-stranded DNA binding;GO:0008310//single-stranded DNA 3'-5' exodeoxyribonuclease activity;GO:0003682//chromatin binding	GO:0007129//synapsis;GO:0000712//resolution of meiotic recombination intermediates;GO:0007140//male meiotic nuclear division;GO:0007141//male meiosis I;GO:0009566//fertilization;GO:0090305//nucleic acid phosphodiester bond hydrolysis;GO:0000724//double-strand break repair via homologous recombination;GO:0007144//female meiosis I	NA	NP_083473.1//meiosis-specific with OB domain-containing protein [Mus musculus]
11576	Afp	2086	52.6094	129.838	1.30332	0.000440696	Up	1.14075e-05	NA	NA	NA	K16144//alpha-fetoprotein	EDL05320.1//alpha fetoprotein, isoform CRA_a [Mus musculus]
102857	Slc6a8	3977	141.864	351.21	1.30782	2.58919e-06	Up	2.97172e-08	GO:0005887//integral component of plasma membrane	GO:0015220//choline transmembrane transporter activity;GO:0005328//neurotransmitter:sodium symporter activity;GO:0005309//creatine:sodium symporter activity	GO:0015881//creatine transport;GO:1990403//embryonic brain development	K05039//solute carrier family 6 (neurotransmitter transporter, GABA) member 6/8/11/12/13	EDL29887.1//solute carrier family 6 (neurotransmitter transporter, creatine), member 8, isoform CRA_a, partial [Mus musculus];NP_001136282.1//sodium- and chloride-dependent creatine transporter 1 isoform 3 [Mus musculus];NP_598748.1//sodium- and chloride-dependent creatine transporter 1 isoform 1 [Mus musculus]
108961	E2f8	3705	19.0262	47.2404	1.31203	0.0174507	Up	0.00103447	GO:0005634//nucleus;GO:0005730//nucleolus;GO:0005667//transcription factor complex;GO:0005829//cytosol	GO:0000978//RNA polymerase II proximal promoter sequence-specific DNA binding;GO:0003677//DNA binding;GO:0003714//transcription corepressor activity;GO:0042802//identical protein binding;GO:0042803//protein homodimerization activity;GO:0001078//transcriptional repressor activity, RNA polymerase II proximal promoter sequence-specific DNA binding;GO:0003700//DNA binding transcription factor activit…	GO:0070365//hepatocyte differentiation;GO:0060718//chorionic trophoblast cell differentiation;GO:0006351//transcription, DNA-templated;GO:0001890//placenta development;GO:0060707//trophoblast giant cell differentiation;GO:0000122//negative regulation of transcription from RNA polymerase II promoter;GO:0032877//positive regulation of DNA endoreduplication;GO:0033301//cell cycle comprising mitosis …	K09391//transcription factor E2F7/8	EDL22968.1//E2F transcription factor 8, partial [Mus musculus]
100702	Gbp6	4329	46.4225	115.854	1.31941	0.00218641	Up	7.82532e-05	GO:0070062//extracellular exosome;GO:0031410//cytoplasmic vesicle;GO:0020005//symbiont-containing vacuole membrane	GO:0005525//GTP binding;GO:0003924//GTPase activity	GO:0071346//cellular response to interferon-gamma;GO:0044406//adhesion of symbiont to host;GO:0035458//cellular response to interferon-beta;GO:0042832//defense response to protozoan;GO:0071222//cellular response to lipopolysaccharide;GO:0050830//defense response to Gram-positive bacterium	K20908//guanylate-binding protein 6	NP_919317.2//guanylate binding protein 6 [Mus musculus]
108153	Adamts7	5424	76.0083	190.516	1.32568	0.00357002	Up	0.000141449	GO:0005615//extracellular space;GO:0009986//cell surface	GO:0004222//metalloendopeptidase activity;GO:0008270//zinc ion binding	NA	K08622//a disintegrin and metalloproteinase with thrombospondin motifs 7 [EC:3.4.24.-]	NP_001003911.2//A disintegrin and metalloproteinase with thrombospondin motifs 7 isoform 1 precursor [Mus musculus]
11611	Agxt	1553	961.803	2422.13	1.33246	0.00012724	Up	2.64112e-06	GO:0005782//peroxisomal matrix	GO:0004760//serine-pyruvate transaminase activity;GO:0016597//amino acid binding;GO:0008453//alanine-glyoxylate transaminase activity;GO:0005102//receptor binding;GO:0043621//protein self-association;GO:0030170//pyridoxal phosphate binding;GO:0042803//protein homodimerization activity	GO:0046724//oxalic acid secretion;GO:0042853//L-alanine catabolic process;GO:0019448//L-cysteine catabolic process;GO:0019265//glycine biosynthetic process, by transamination of glyoxylate;GO:0007219//Notch signaling pathway;GO:0009436//glyoxylate catabolic process	K00830//alanine-glyoxylate transaminase / serine-glyoxylate transaminase / serine-pyruvate transaminase [EC:2.6.1.44 2.6.1.45 2.6.1.51]	XP_021054625.1//serine--pyruvate aminotransferase [Mus pahari]
12739	Cldn3	1263	756.765	1907.36	1.33366	2.76111e-06	Up	3.22157e-08	GO:0070062//extracellular exosome;GO:0016327//apicolateral plasma membrane;GO:0016021//integral component of membrane;GO:0005923//bicellular tight junction;GO:0016328//lateral plasma membrane;GO:0005737//cytoplasm	GO:0042802//identical protein binding;GO:0005198//structural molecule activity	GO:0051291//protein heterooligomerization;GO:0016338//calcium-independent cell-cell adhesion via plasma membrane cell-adhesion molecules;GO:0070830//bicellular tight junction assembly;GO:0003382//epithelial cell morphogenesis;GO:0051260//protein homooligomerization;GO:0001666//response to hypoxia;GO:0045471//response to ethanol	K06087//claudin	NP_034032.1//claudin-3 [Mus musculus]
70080	Igsf23	1895	130.96	334.108	1.35118	8.20279e-10	Up	3.32796e-12	GO:0016021//integral component of membrane	NA	NA	K06499//carcinoembryonic antigen-related cell adhesion molecule	EDL23205.1//mCG54481, isoform CRA_b, partial [Mus musculus]
242484	D630039A03Rik	2929	96.0215	245.756	1.3558	4.59296e-08	Up	3.39285e-10	NA	NA	NA	NA	NP_848842.1//uncharacterized protein C9orf152 homolog [Mus musculus]
14969	H2-Eb1	1669	24.282	62.4883	1.3637	0.0113224	Up	0.000594461	GO:0042613//MHC class II protein complex;GO:0016021//integral component of membrane	NA	GO:0006955//immune response;GO:0002504//antigen processing and presentation of peptide or polysaccharide antigen via MHC class II	K06752//major histocompatibility complex, class II	NP_034512.2//H-2 class II histocompatibility antigen, I-E beta chain precursor [Mus musculus]
16668	Krt18	1400	1771.21	4657.12	1.3947	7.01194e-07	Up	6.89208e-09	GO:0070062//extracellular exosome;GO:0005815//microtubule organizing center;GO:0071944//cell periphery;GO:0016363//nuclear matrix;GO:0005882//intermediate filament;GO:0005737//cytoplasm;GO:0034451//centriolar satellite;GO:0005730//nucleolus;GO:0005913//cell-cell adherens junction;GO:0005829//cytosol;GO:0045095//keratin filament	GO:0097110//scaffold protein binding;GO:0003723//RNA binding;GO:0098641//cadherin binding involved in cell-cell adhesion;GO:0005198//structural molecule activity	GO:0097284//hepatocyte apoptotic process;GO:0043000//Golgi to plasma membrane CFTR protein transport;GO:0097191//extrinsic apoptotic signaling pathway;GO:0045104//intermediate filament cytoskeleton organization;GO:0043066//negative regulation of apoptotic process;GO:0033209//tumor necrosis factor-mediated signaling pathway	K07604//type I keratin, acidic	NP_001091276.1//uncharacterized protein LOC100037084 [Xenopus laevis]
217258	Abca8a	5629	598.442	1577.22	1.3981	0.000633178	Up	1.75724e-05	GO:0016021//integral component of membrane	GO:0005524//ATP binding;GO:0005215//transporter activity;GO:0016887//ATPase activity	NA	K05650//ATP-binding cassette, subfamily A (ABC1), member 8	XP_021031603.1//ATP-binding cassette sub-family A member 8-A [Mus caroli]
109901	Cela1	1124	81.8148	216.241	1.40221	0.00437838	Up	0.000180428	GO:0005615//extracellular space	GO:0004252//serine-type endopeptidase activity;GO:0046872//metal ion binding	GO:0048771//tissue remodeling;GO:0042127//regulation of cell proliferation;GO:0035264//multicellular organism growth;GO:0006954//inflammatory response;GO:0000122//negative regulation of transcription from RNA polymerase II promoter;GO:0055123//digestive system development;GO:0009791//post-embryonic development;GO:0061113//pancreas morphogenesis;GO:0060309//elastin catabolic process;GO:0045944//po…	K01326//pancreatic elastase I [EC:3.4.21.36]	NP_291090.2//chymotrypsin-like elastase family member 1 precursor [Mus musculus]
71839	Osgin1	1982	1022.13	2722.53	1.41337	1.71714e-06	Up	1.8859e-08	NA	GO:0008083//growth factor activity	GO:0030308//negative regulation of cell growth;GO:0043065//positive regulation of apoptotic process	K10955//mucin-2	NP_082226.1//oxidative stress-induced growth inhibitor 1 [Mus musculus]
93673	Nat8f2	3280	5864.39	15677.2	1.41862	9.66992e-09	Up	6.13963e-11	GO:0005783//endoplasmic reticulum;GO:0005794//Golgi apparatus;GO:0016021//integral component of membrane	GO:0008080//N-acetyltransferase activity	GO:0001702//gastrulation with mouth forming second;GO:0007162//negative regulation of cell adhesion	K20838//N-acetyltransferase 8 [EC:2.3.1.80 2.3.1.-]	NP_444326.2//probable N-acetyltransferase CML2 [Mus musculus]
67803	Limd2	2950	106.435	285.264	1.42233	2.59872e-08	Up	1.80863e-10	GO:0005634//nucleus;GO:0005737//cytoplasm	GO:0046872//metal ion binding	NA	K19947//F-actin monooxygenase [EC:1.14.13.225];K08271//STE20-related kinase adapter protein alpha	XP_007616589.1//PREDICTED: LIM domain-containing protein 2 isoform X2 [Cricetulus griseus]
15006	H2-Q1	2044	32.2972	87.9104	1.44462	0.00721577	Up	0.000340524	GO:0016020//membrane;GO:0070062//extracellular exosome;GO:0070971//endoplasmic reticulum exit site;GO:0005783//endoplasmic reticulum;GO:0009897//external side of plasma membrane;GO:0030670//phagocytic vesicle membrane;GO:0005797//Golgi medial cisterna;GO:0009986//cell surface;GO:0071556//integral component of lumenal side of endoplasmic reticulum membrane;GO:0042612//MHC class I protein complex;G…	GO:0003723//RNA binding;GO:0046977//TAP binding;GO:0030881//beta-2-microglobulin binding;GO:0042605//peptide antigen binding;GO:0005102//receptor binding;GO:0042608//T cell receptor binding	GO:0010977//negative regulation of neuron projection development;GO:0001916//positive regulation of T cell mediated cytotoxicity;GO:0006955//immune response;GO:0002474//antigen processing and presentation of peptide antigen via MHC class I;GO:0002485//antigen processing and presentation of endogenous peptide antigen via MHC class I via ER pathway, TAP-dependent	K06751//major histocompatibility complex, class I	EDL06701.1//mCG4996 [Mus musculus]
14727	Lilr4b	1482	19.6989	54.0293	1.45563	0.0231095	Up	0.00148691	GO:0070062//extracellular exosome;GO:0016021//integral component of membrane;GO:0005886//plasma membrane	NA	GO:0002250//adaptive immune response	K06512//leukocyte immunoglobulin-like receptor	NP_001278822.1//mast cell surface glycoprotein Gp49A isoform 3 precursor [Mus musculus];NP_032173.1//mast cell surface glycoprotein Gp49A isoform 1 precursor [Mus musculus]
66570	Cenpm	1217	24.5469	67.565	1.46074	0.0240689	Up	0.00157227	GO:0005634//nucleus;GO:0005829//cytosol;GO:0000777//condensed chromosome kinetochore	NA	NA	K11505//centromere protein M	NP_079915.1//centromere protein M isoform 1 [Mus musculus];EDL04523.1//centromere protein M, isoform CRA_a, partial [Mus musculus]
26876	Adh4	1312	859.144	2367.88	1.46262	3.52054e-13	Up	5.58816e-16	GO:0005634//nucleus;GO:0005829//cytosol	GO:0016620//oxidoreductase activity, acting on the aldehyde or oxo group of donors, NAD or NADP as acceptor;GO:0019115//benzaldehyde dehydrogenase activity;GO:0005503//all-trans retinal binding;GO:0004032//alditol:NADP+ 1-oxidoreductase activity;GO:0051287//NAD binding;GO:0019841//retinol binding;GO:0004022//alcohol dehydrogenase (NAD) activity;GO:0004745//retinol dehydrogenase activity;GO:000827…	GO:0006069//ethanol oxidation;GO:0042572//retinol metabolic process;GO:0006066//alcohol metabolic process;GO:1901661//quinone metabolic process;GO:0006067//ethanol metabolic process;GO:0006081//cellular aldehyde metabolic process;GO:0001523//retinoid metabolic process;GO:0046164//alcohol catabolic process	K13980//alcohol dehydrogenase 4 [EC:1.1.1.1]	NP_036126.2//alcohol dehydrogenase 4 [Mus musculus]
73608	Marveld3	2224	31.2029	86.2505	1.46685	0.00165697	Up	5.4929e-05	GO:0031410//cytoplasmic vesicle;GO:0016021//integral component of membrane;GO:0005923//bicellular tight junction	GO:0031435//mitogen-activated protein kinase kinase kinase binding	GO:0045216//cell-cell junction organization;GO:1902414//protein localization to cell junction;GO:0070830//bicellular tight junction assembly;GO:0006970//response to osmotic stress;GO:0046329//negative regulation of JNK cascade;GO:0050680//negative regulation of epithelial cell proliferation;GO:0010633//negative regulation of epithelial cell migration	K21099//MARVEL domain-containing protein 3	NP_082860.2//MARVEL domain-containing protein 3 isoform a [Mus musculus];NP_997612.2//MARVEL domain-containing protein 3 isoform b [Mus musculus]
14960	H2-Aa	1084	34.2681	94.8708	1.4691	0.014149	Up	0.000786921	GO:0016020//membrane;GO:0042613//MHC class II protein complex;GO:0009897//external side of plasma membrane;GO:0016021//integral component of membrane;GO:0005764//lysosome;GO:0005886//plasma membrane	GO:0042605//peptide antigen binding	GO:0019882//antigen processing and presentation;GO:0034341//response to interferon-gamma;GO:0019886//antigen processing and presentation of exogenous peptide antigen via MHC class II;GO:0045582//positive regulation of T cell differentiation;GO:0048002//antigen processing and presentation of peptide antigen	K06752//major histocompatibility complex, class II	NP_034508.2//histocompatibility 2, class II antigen A, alpha precursor [Mus musculus]
211924	Dsg1c	2980	77.2394	214.123	1.47103	0.0020099	Up	7.03019e-05	GO:0016021//integral component of membrane;GO:0005886//plasma membrane;GO:0030057//desmosome	GO:0005509//calcium ion binding	GO:0007156//homophilic cell adhesion via plasma membrane adhesion molecules	K07596//desmoglein 1	EDK96945.1//mCG140888, isoform CRA_c, partial [Mus musculus]
14457	Gas7	6924	148.798	412.683	1.47168	2.58397e-09	Up	1.32511e-11	NA	NA	NA	K18618//growth arrest-specific protein 7	NP_032114.2//growth arrest-specific protein 7 isoform a [Mus musculus];XP_006532265.1//PREDICTED: growth arrest-specific protein 7 isoform X1 [Mus musculus];XP_008853947.1//PREDICTED: growth arrest-specific protein 7 isoform X3 [Nannospalax galili]
14860	Gsta4	970	288.138	806.585	1.48507	0.00682315	Up	0.000318663	GO:0005739//mitochondrion	GO:0004364//glutathione transferase activity;GO:0043295//glutathione binding;GO:0008144//drug binding	GO:0035094//response to nicotine;GO:0006749//glutathione metabolic process;GO:0006805//xenobiotic metabolic process;GO:0010043//response to zinc ion;GO:0009635//response to herbicide;GO:0071285//cellular response to lithium ion	K00799//glutathione S-transferase [EC:2.5.1.18]	NP_034487.2//glutathione S-transferase A4 [Mus musculus]
18260	Ocln	3192	165.526	463.387	1.48516	9.79969e-15	Up	1.13672e-17	GO:0016327//apicolateral plasma membrane;GO:0016324//apical plasma membrane;GO:0031410//cytoplasmic vesicle;GO:0030054//cell junction;GO:0009986//cell surface;GO:0030139//endocytic vesicle;GO:0005911//cell-cell junction;GO:0016021//integral component of membrane;GO:0005923//bicellular tight junction;GO:0016328//lateral plasma membrane;GO:0005886//plasma membrane	GO:0019904//protein domain specific binding	GO:0070673//response to interleukin-18;GO:0045216//cell-cell junction organization;GO:0070830//bicellular tight junction assembly;GO:0071356//cellular response to tumor necrosis factor	K06088//occludin	EDL00805.1//occludin, isoform CRA_b, partial [Mus musculus]
16582	Kifc3	3270	218.239	614.19	1.49278	6.1604e-10	Up	2.36938e-12	GO:0070062//extracellular exosome;GO:0005874//microtubule;GO:0005794//Golgi apparatus;GO:0005813//centrosome;GO:0005915//zonula adherens;GO:0005871//kinesin complex;GO:0030659//cytoplasmic vesicle membrane	GO:0005524//ATP binding;GO:0008569//ATP-dependent microtubule motor activity, minus-end-directed;GO:0008017//microtubule binding	GO:0045218//zonula adherens maintenance;GO:0090136//epithelial cell-cell adhesion;GO:0007018//microtubule-based movement;GO:0007017//microtubule-based process;GO:0007030//Golgi organization	K10406//kinesin family member C2/C3	XP_006530786.1//PREDICTED: kinesin-like protein KIFC3 isoform X5 [Mus musculus];XP_017168074.1//PREDICTED: kinesin-like protein KIFC3 isoform X6 [Mus musculus];XP_006530780.1//PREDICTED: kinesin-like protein KIFC3 isoform X1 [Mus musculus]
67775	Rtp4	1573	45.7007	128.807	1.49492	0.000342872	Up	8.28922e-06	GO:0009986//cell surface;GO:0016021//integral component of membrane;GO:0005737//cytoplasm	GO:0031849//olfactory receptor binding	GO:0006612//protein targeting to membrane;GO:0051607//defense response to virus;GO:0001580//detection of chemical stimulus involved in sensory perception of bitter taste;GO:0051205//protein insertion into membrane	NA	NP_075875.3//receptor-transporting protein 4 [Mus musculus]
11622	Ahr	5494	287.324	811.041	1.4971	4.1542e-05	Up	7.30409e-07	NA	NA	NA	K09093//aryl hydrocarbon receptor	EDL36863.1//aryl-hydrocarbon receptor, partial [Mus musculus]
15959	Ifit3	1998	26.6459	75.3214	1.49915	0.00045504	Up	1.18344e-05	GO:0005829//cytosol;GO:0005739//mitochondrion;GO:0005737//cytoplasm	GO:0042802//identical protein binding	GO:0035458//cellular response to interferon-beta;GO:0035634//response to stilbenoid;GO:0051607//defense response to virus;GO:0043066//negative regulation of apoptotic process;GO:0009615//response to virus;GO:0035457//cellular response to interferon-alpha;GO:0008285//negative regulation of cell proliferation	K14217//interferon-induced protein with tetratricopeptide repeats 1	XP_021070111.1//interferon-induced protein with tetratricopeptide repeats 3 [Mus pahari]
210274	Shank2	6359	95.503	270.941	1.50436	7.00747e-11	Up	2.09625e-13	GO:0060170//ciliary membrane;GO:0048786//presynaptic active zone;GO:0001917//photoreceptor inner segment;GO:0016324//apical plasma membrane;GO:0031526//brush border membrane;GO:0030054//cell junction;GO:0014069//postsynaptic density;GO:0001750//photoreceptor outer segment;GO:0043025//neuronal cell body;GO:0043005//neuron projection;GO:0030426//growth cone;GO:0005883//neurofilament;GO:0043197//den…	GO:0098919//structural constituent of postsynaptic density;GO:0008022//protein C-terminus binding;GO:0035255//ionotropic glutamate receptor binding;GO:0017124//SH3 domain binding	GO:0035176//social behavior;GO:0007612//learning;GO:0007420//brain development;GO:0007416//synapse assembly;GO:0060292//long term synaptic depression;GO:0007613//memory;GO:0035640//exploration behavior;GO:0060291//long-term synaptic potentiation;GO:0051968//positive regulation of synaptic transmission, glutamatergic;GO:0007584//response to nutrient;GO:0030534//adult behavior;GO:0099562//maintenan…	K15009//SH3 and multiple ankyrin repeat domains protein	NP_001074839.2//SH3 and multiple ankyrin repeat domains protein 2 isoform a [Mus musculus];NP_001106844.2//SH3 and multiple ankyrin repeat domains protein 2 isoform b [Mus musculus]
218518	Marveld2	2829	118.349	337.732	1.51283	2.97107e-07	Up	2.68448e-09	GO:0061689//tricellular tight junction;GO:0016323//basolateral plasma membrane;GO:0016324//apical plasma membrane;GO:0031410//cytoplasmic vesicle;GO:0030054//cell junction;GO:0043220//Schmidt-Lanterman incisure;GO:0005737//cytoplasm;GO:0005923//bicellular tight junction;GO:0016021//integral component of membrane;GO:0033010//paranodal junction	NA	GO:0045216//cell-cell junction organization;GO:0070830//bicellular tight junction assembly;GO:0007605//sensory perception of sound;GO:0061028//establishment of endothelial barrier	K17291//MARVEL domain-containing protein 2	NP_001033691.1//MARVEL domain-containing protein 2 isoform 1 [Mus musculus];NP_848497.2//MARVEL domain-containing protein 2 isoform 2 [Mus musculus]
54396	Irgm2	3537	125.62	359.602	1.51733	2.02521e-05	Up	3.09099e-07	GO:0005794//Golgi apparatus;GO:0005829//cytosol;GO:0005739//mitochondrion;GO:0005789//endoplasmic reticulum membrane;GO:0020003//symbiont-containing vacuole;GO:0000139//Golgi membrane	GO:0050700//CARD domain binding;GO:0051434//BH3 domain binding;GO:0043539//protein serine/threonine kinase activator activity;GO:0005525//GTP binding;GO:0019901//protein kinase binding;GO:0003924//GTPase activity	GO:0050829//defense response to Gram-negative bacterium;GO:0071222//cellular response to lipopolysaccharide;GO:0060335//positive regulation of interferon-gamma-mediated signaling pathway;GO:0042742//defense response to bacterium;GO:0035458//cellular response to interferon-beta;GO:0034341//response to interferon-gamma;GO:0071902//positive regulation of protein serine/threonine kinase activity;GO:0…	K14139//immunity-related GTPase family M protein [EC:3.6.5.-];K14140//interferon gamma induced GTPase	NP_062313.3//interferon inducible GTPase 2 [Mus musculus]
100038882	Isg15	756	25.6165	73.3378	1.51748	0.0017152	Up	5.84299e-05	GO:0005576//extracellular region;GO:0005737//cytoplasm	GO:0031386//protein tag	GO:0032649//regulation of interferon-gamma production;GO:0031397//negative regulation of protein ubiquitination;GO:0051607//defense response to virus;GO:0019941//modification-dependent protein catabolic process;GO:0042742//defense response to bacterium;GO:0034340//response to type I interferon;GO:0030501//positive regulation of bone mineralization;GO:0032020//ISG15-protein conjugation;GO:0045071/…	K12159//ubiquitin cross-reactive protein	NP_056598.2//ubiquitin-like protein ISG15 precursor [Mus musculus]
19733	Rgn	1574	5152.74	14760.1	1.51829	0.000106473	Up	2.12557e-06	GO:0005634//nucleus;GO:0005829//cytosol;GO:0005576//extracellular region;GO:0005737//cytoplasm	GO:0004341//gluconolactonase activity;GO:0005509//calcium ion binding;GO:0008270//zinc ion binding;GO:0030234//enzyme regulator activity	GO:0010867//positive regulation of triglyceride biosynthetic process;GO:0097421//liver regeneration;GO:0032515//negative regulation of phosphoprotein phosphatase activity;GO:1901671//positive regulation of superoxide dismutase activity;GO:1903634//negative regulation of leucine-tRNA ligase activity;GO:0019853//L-ascorbic acid biosynthetic process;GO:1903629//positive regulation of dUTP diphosphat…	K01053//gluconolactonase [EC:3.1.1.17]	NP_033086.1//regucalcin [Mus musculus]
56520	Nme4	863	32.5764	93.4692	1.52066	6.43666e-06	Up	8.40931e-08	GO:0005759//mitochondrial matrix;GO:0016020//membrane;GO:0005758//mitochondrial intermembrane space;GO:0005739//mitochondrion	GO:0046872//metal ion binding;GO:1901612//cardiolipin binding;GO:0005524//ATP binding;GO:0051020//GTPase binding;GO:0004550//nucleoside diphosphate kinase activity;GO:0032403//protein complex binding	GO:0006228//UTP biosynthetic process;GO:0006869//lipid transport;GO:0006241//CTP biosynthetic process;GO:0042981//regulation of apoptotic process;GO:0006183//GTP biosynthetic process	K00940//nucleoside-diphosphate kinase [EC:2.7.4.6]	XP_006524740.1//PREDICTED: nucleoside diphosphate kinase, mitochondrial isoform X1 [Mus musculus]
54123	Irf7	1812	86.4595	256.335	1.56794	0.00231942	Up	8.37765e-05	GO:0005634//nucleus;GO:0005654//nucleoplasm;GO:0005829//cytosol;GO:0005737//cytoplasm	GO:0000982//transcription factor activity, RNA polymerase II proximal promoter sequence-specific DNA binding;GO:0003677//DNA binding;GO:0000979//RNA polymerase II core promoter sequence-specific DNA binding;GO:0003700//DNA binding transcription factor activity	GO:0034124//regulation of MyD88-dependent toll-like receptor signaling pathway;GO:0032481//positive regulation of type I interferon production;GO:0016064//immunoglobulin mediated immune response;GO:0032607//interferon-alpha production;GO:0045893//positive regulation of transcription, DNA-templated;GO:0045087//innate immune response;GO:0032728//positive regulation of interferon-beta production;GO:…	K09447//interferon regulatory factor 7	NP_058546.1//interferon regulatory factor 7 isoform 1 [Mus musculus];NP_001239530.1//interferon regulatory factor 7 isoform 3 [Mus musculus];NP_001239529.1//interferon regulatory factor 7 isoform 2 [Mus musculus]
231655	Oasl1	2124	24.6085	73.2947	1.57455	0.0124817	Up	0.000674444	GO:0016020//membrane;GO:0005654//nucleoplasm;GO:0005730//nucleolus;GO:0005829//cytosol;GO:0005737//cytoplasm	GO:0003723//RNA binding;GO:0003677//DNA binding;GO:0005524//ATP binding;GO:0016740//transferase activity;GO:0003725//double-stranded RNA binding	GO:0045071//negative regulation of viral genome replication;GO:0051607//defense response to virus;GO:0009615//response to virus;GO:0045087//innate immune response	K14608//2'-5'-oligoadenylate synthase-like protein	EDL19890.1//2'-5' oligoadenylate synthetase-like 1, isoform CRA_a [Mus musculus]
96935	Susd4	2035	118.037	352.804	1.57963	1.00365e-07	Up	7.89832e-10	GO:0016021//integral component of membrane	NA	GO:0030449//regulation of complement activation;GO:0045959//negative regulation of complement activation, classical pathway;GO:0045957//negative regulation of complement activation, alternative pathway	K17495//CUB and sushi domain-containing protein	EDL13100.1//sushi domain containing 4, isoform CRA_a, partial [Mus musculus]
105171	Arrdc3	4102	1634.08	4895.62	1.58301	1.50967e-05	Up	2.24883e-07	GO:0005768//endosome;GO:0005764//lysosome;GO:0005886//plasma membrane;GO:0005769//early endosome	GO:0031699//beta-3 adrenergic receptor binding	GO:0001659//temperature homeostasis;GO:0090327//negative regulation of locomotion involved in locomotory behavior;GO:0043588//skin development;GO:0031651//negative regulation of heat generation;GO:0071879//positive regulation of adrenergic receptor signaling pathway;GO:0051443//positive regulation of ubiquitin-protein transferase activity;GO:0044252//negative regulation of multicellular organisma…	K20910//thioredoxin-interacting protein	BAC65781.1//mKIAA1376 protein, partial [Mus musculus]
12737	Cldn1	3263	669.285	2041.62	1.60902	1.48665e-09	Up	6.98855e-12	GO:0016323//basolateral plasma membrane;GO:0016324//apical plasma membrane;GO:0030054//cell junction;GO:0005737//cytoplasm;GO:0005887//integral component of plasma membrane;GO:0005923//bicellular tight junction;GO:0016021//integral component of membrane;GO:0016328//lateral plasma membrane;GO:0005886//plasma membrane	GO:0042802//identical protein binding;GO:0005198//structural molecule activity;GO:0001618//virus receptor activity	GO:0097421//liver regeneration;GO:0008065//establishment of blood-nerve barrier;GO:0032496//response to lipopolysaccharide;GO:0051260//protein homooligomerization;GO:0071356//cellular response to tumor necrosis factor;GO:0009636//response to toxic substance;GO:0045471//response to ethanol;GO:0070673//response to interleukin-18;GO:0045216//cell-cell junction organization;GO:0071346//cellular respo…	K06087//claudin	NP_057883.1//claudin-1 [Mus musculus]
16475	Ajuba	3503	104.855	322.051	1.61889	0.00909008	Up	0.000446735	GO:0005634//nucleus;GO:0005654//nucleoplasm;GO:0005815//microtubule organizing center;GO:0005925//focal adhesion;GO:0005912//adherens junction;GO:0000932//P-body;GO:0030027//lamellipodium;GO:0005667//transcription factor complex;GO:0005911//cell-cell junction;GO:0005829//cytosol;GO:0005794//Golgi apparatus;GO:0005886//plasma membrane	GO:0051015//actin filament binding;GO:0046872//metal ion binding;GO:0003714//transcription corepressor activity;GO:0003682//chromatin binding;GO:0045294//alpha-catenin binding	GO:0030032//lamellipodium assembly;GO:0035329//hippo signaling;GO:0006355//regulation of transcription, DNA-templated;GO:0000122//negative regulation of transcription from RNA polymerase II promoter;GO:0030334//regulation of cell migration;GO:0048041//focal adhesion assembly;GO:1900037//regulation of cellular response to hypoxia;GO:0043406//positive regulation of MAP kinase activity;GO:0006351//t…	K16682//LIM domain-containing protein	NP_034720.2//LIM domain-containing protein ajuba [Mus musculus]
15901	Id1	934	50.2664	155.048	1.62505	0.000466052	Up	1.22061e-05	GO:0005654//nucleoplasm;GO:0005794//Golgi apparatus;GO:0005813//centrosome	GO:0008022//protein C-terminus binding;GO:0047485//protein N-terminus binding;GO:0070628//proteasome binding;GO:0008134//transcription factor binding;GO:0042803//protein homodimerization activity	GO:0043433//negative regulation of DNA binding transcription factor activity;GO:1990090//cellular response to nerve growth factor stimulus;GO:0007420//brain development;GO:1901342//regulation of vasculature development;GO:0000122//negative regulation of transcription from RNA polymerase II promoter;GO:0071560//cellular response to transforming growth factor beta stimulus;GO:0032091//negative regu…	K04680//DNA-binding protein inhibitor ID1	AAA37879.1//helix-loop-helix protein (Id), partial [Mus musculus]
54418	Fmn2	6461	35.8661	111.956	1.64224	0.0451196	Up	0.00351757	GO:0005783//endoplasmic reticulum;GO:0005938//cell cortex;GO:0005902//microvillus;GO:0005884//actin filament;GO:0005730//nucleolus;GO:0005829//cytosol;GO:0005819//spindle;GO:0005789//endoplasmic reticulum membrane;GO:0005886//plasma membrane;GO:0030659//cytoplasmic vesicle membrane	GO:0003779//actin binding;GO:0008017//microtubule binding	GO:0071456//cellular response to hypoxia;GO:0046907//intracellular transport;GO:0048477//oogenesis;GO:0042177//negative regulation of protein catabolic process;GO:0070649//formin-nucleated actin cable assembly;GO:0016192//vesicle-mediated transport;GO:0051017//actin filament bundle assembly;GO:0040038//polar body extrusion after meiotic divisions;GO:0015031//protein transport;GO:0006974//cellular…	K02184//formin 2	NP_062318.2//formin-2 [Mus musculus]
219132	Phf11d	2696	11.3959	36.3089	1.6718	0.0109028	Up	0.000565775	GO:0005634//nucleus;GO:0005654//nucleoplasm;GO:0031965//nuclear membrane	GO:0046872//metal ion binding	GO:0006355//regulation of transcription, DNA-templated;GO:0006351//transcription, DNA-templated	K18494//histone-lysine N-methyltransferase SETDB2 [EC:2.1.1.43]	A6H5X4.1//RecName: Full=PHD finger protein 11; AltName: Full=PHD finger protein 11-like; AltName: Full=PHD finger protein 11D
16774	Lama3	10343	26.8171	86.4658	1.68898	0.012638	Up	0.000686678	NA	NA	NA	K06240//laminin, alpha 3/5	XP_021006778.1//laminin subunit alpha-3 [Mus caroli]
23962	Oasl2	3136	22.7871	73.7046	1.69353	0.00125524	Up	3.92358e-05	NA	GO:0046872//metal ion binding;GO:0005524//ATP binding;GO:0001730//2'-5'-oligoadenylate synthetase activity;GO:0003725//double-stranded RNA binding	GO:0006955//immune response;GO:0006164//purine nucleotide biosynthetic process;GO:0051607//defense response to virus;GO:0009615//response to virus;GO:0045087//innate immune response	K14608//2'-5'-oligoadenylate synthase-like protein	XP_021018452.1//2'-5'-oligoadenylate synthase-like protein 2 [Mus caroli]
71093	Atoh8	2355	172.064	557.724	1.6966	8.30352e-12	Up	1.87564e-14	GO:0005634//nucleus;GO:0005654//nucleoplasm;GO:0016607//nuclear speck;GO:0005737//cytoplasm	GO:0070888//E-box binding;GO:0008134//transcription factor binding;GO:0003700//DNA binding transcription factor activity;GO:0033613//activating transcription factor binding;GO:0046983//protein dimerization activity	GO:0007399//nervous system development;GO:0045892//negative regulation of transcription, DNA-templated;GO:0001937//negative regulation of endothelial cell proliferation;GO:0051450//myoblast proliferation;GO:0030154//cell differentiation;GO:0006351//transcription, DNA-templated;GO:0010595//positive regulation of endothelial cell migration;GO:0001704//formation of primary germ layer;GO:0035148//tub…	K09084//atonal protein 8	NP_722473.1//protein atonal homolog 8 [Mus musculus]
13077	Cyp1a2	1892	4970.35	16162.5	1.70123	5.01801e-09	Up	2.78778e-11	GO:0043231//intracellular membrane-bounded organelle;GO:0031090//organelle membrane;GO:0005789//endoplasmic reticulum membrane	GO:0020037//heme binding;GO:0005506//iron ion binding;GO:0034875//caffeine oxidase activity;GO:0070330//aromatase activity;GO:0004497//monooxygenase activity;GO:0032451//demethylase activity;GO:0019899//enzyme binding;GO:0016712//oxidoreductase activity, acting on paired donors, with incorporation or reduction of molecular oxygen, reduced flavin or flavoprotein as one donor, and incorporation of …	GO:0030324//lung development;GO:0018894//dibenzo-p-dioxin metabolic process;GO:0010468//regulation of gene expression;GO:0009404//toxin metabolic process;GO:0070989//oxidative demethylation;GO:0016098//monoterpenoid metabolic process;GO:0006725//cellular aromatic compound metabolic process;GO:0032496//response to lipopolysaccharide;GO:0055114//oxidation-reduction process;GO:0017144//drug metaboli…	K07409//cytochrome P450 family 1 subfamily A polypeptide 2 [EC:1.14.14.1]	NP_034123.1//cytochrome P450 1A2 [Mus musculus]
17869	Myc	2396	60.9883	199.067	1.70665	0.0217995	Up	0.00137877	GO:0030424//axon;GO:0005634//nucleus;GO:0016604//nuclear body;GO:0005719//nuclear euchromatin;GO:0005739//mitochondrion;GO:0005737//cytoplasm;GO:0000790//nuclear chromatin	GO:0003677//DNA binding;GO:0070888//E-box binding;GO:0000987//proximal promoter sequence-specific DNA binding;GO:0003700//DNA binding transcription factor activity;GO:0003690//double-stranded DNA binding;GO:0033613//activating transcription factor binding;GO:0046983//protein dimerization activity	GO:0006865//amino acid transport;GO:0060070//canonical Wnt signaling pathway;GO:0001658//branching involved in ureteric bud morphogenesis;GO:0001783//B cell apoptotic process;GO:0006919//activation of cysteine-type endopeptidase activity involved in apoptotic process	K04377//Myc proto-oncogene protein	NP_034979.3//myc proto-oncogene protein isoform a [Mus musculus];NP_001170824.1//myc proto-oncogene protein isoform c [Mus musculus]
64136	Sdf2l1	1118	186.12	610.474	1.7137	1.72059e-07	Up	1.42857e-09	GO:0016020//membrane;GO:0005788//endoplasmic reticulum lumen;GO:0034663//endoplasmic reticulum chaperone complex;GO:0005783//endoplasmic reticulum;GO:0005789//endoplasmic reticulum membrane	GO:0051787//misfolded protein binding;GO:0051087//chaperone binding;GO:0051117//ATPase binding;GO:0004169//dolichyl-phosphate-mannose-protein mannosyltransferase activity	GO:0071712//ER-associated misfolded protein catabolic process;GO:0034976//response to endoplasmic reticulum stress;GO:0071218//cellular response to misfolded protein;GO:0042981//regulation of apoptotic process	K00728//dolichyl-phosphate-mannose-protein mannosyltransferase [EC:2.4.1.109]	NP_071719.1//stromal cell-derived factor 2-like protein 1 precursor [Mus musculus]
20347	Sema3b	3833	11.0397	36.2402	1.7149	0.0408209	Up	0.00311764	NA	NA	NA	K06840//semaphorin 3	NP_033179.2//semaphorin-3B precursor [Mus musculus]
15567	Slc6a4	2747	10.4063	34.3351	1.72223	0.0130207	Up	0.000711446	GO:0010008//endosome membrane;GO:0012505//endomembrane system;GO:0045121//membrane raft;GO:0005887//integral component of plasma membrane;GO:0005829//cytosol;GO:0098793//presynapse;GO:0005886//plasma membrane;GO:0043005//neuron projection	GO:0017075//syntaxin-1 binding;GO:0005335//serotonin:sodium symporter activity;GO:0051015//actin filament binding;GO:0008504//monoamine transmembrane transporter activity;GO:0005330//dopamine:sodium symporter activity;GO:0042803//protein homodimerization activity;GO:0015222//serotonin transmembrane transporter activity;GO:0019811//cocaine binding;GO:0046872//metal ion binding;GO:0050998//nitric-o…	GO:0042310//vasoconstriction;GO:0051260//protein homooligomerization;GO:0009636//response to toxic substance;GO:0014064//positive regulation of serotonin secretion;GO:0032227//negative regulation of synaptic transmission, dopaminergic;GO:0071310//cellular response to organic substance;GO:0051583//dopamine uptake involved in synaptic transmission;GO:0032355//response to estradiol;GO:0046621//negat…	K05037//solute carrier family 6 (neurotransmitter transporter, serotonin) member 4	NP_034614.2//sodium-dependent serotonin transporter [Mus musculus]
53897	Gal3st1	1766	22.4914	74.2516	1.72305	2.9599e-05	Up	4.89702e-07	GO:0005794//Golgi apparatus;GO:0016021//integral component of membrane	GO:0001733//galactosylceramide sulfotransferase activity	GO:0042552//myelination;GO:0007283//spermatogenesis;GO:0006682//galactosylceramide biosynthetic process	K01019//galactosylceramide sulfotransferase [EC:2.8.2.11]	XP_021033185.1//galactosylceramide sulfotransferase isoform X1 [Mus caroli]
64074	Smoc2	2832	102.152	345.106	1.75633	1.74539e-09	Up	8.37159e-12	GO:0005614//interstitial matrix;GO:0005578//proteinaceous extracellular matrix;GO:0005604//basement membrane	GO:0005509//calcium ion binding;GO:0008201//heparin binding;GO:0005539//glycosaminoglycan binding	GO:0007165//signal transduction;GO:0030198//extracellular matrix organization;GO:0010811//positive regulation of cell-substrate adhesion	K10809//thyroglobulin	NP_071710.2//SPARC-related modular calcium-binding protein 2 precursor [Mus musculus]
13710	Elf3	1940	6.90709	23.5897	1.77201	0.0333463	Up	0.00239816	GO:0005634//nucleus;GO:0005654//nucleoplasm;GO:0005794//Golgi apparatus;GO:0005829//cytosol	GO:0000978//RNA polymerase II proximal promoter sequence-specific DNA binding;GO:0003677//DNA binding;GO:0003713//transcription coactivator activity;GO:0001077//transcriptional activator activity, RNA polymerase II proximal promoter sequence-specific DNA binding;GO:0003700//DNA binding transcription factor activity	GO:0045892//negative regulation of transcription, DNA-templated;GO:0060056//mammary gland involution;GO:0009653//anatomical structure morphogenesis;GO:0030154//cell differentiation;GO:0006355//regulation of transcription, DNA-templated;GO:0045893//positive regulation of transcription, DNA-templated;GO:0006954//inflammatory response;GO:0001824//blastocyst development;GO:0045944//positive regulatio…	K09429//E74-like factor 3	XP_006529187.1//PREDICTED: ETS-related transcription factor Elf-3 isoform X1 [Mus musculus];XP_006529188.1//PREDICTED: ETS-related transcription factor Elf-3 isoform X2 [Mus musculus]
13118	Cyp4a12b	2395	2517.72	8661.13	1.78244	1.82537e-10	Up	6.01769e-13	GO:0043231//intracellular membrane-bounded organelle;GO:0031090//organelle membrane;GO:0016021//integral component of membrane;GO:0005789//endoplasmic reticulum membrane	GO:0016705//oxidoreductase activity, acting on paired donors, with incorporation or reduction of molecular oxygen;GO:0020037//heme binding;GO:0005506//iron ion binding;GO:0070330//aromatase activity;GO:0004497//monooxygenase activity	GO:0033574//response to testosterone;GO:0048252//lauric acid metabolic process;GO:0001822//kidney development;GO:0019369//arachidonic acid metabolic process;GO:0006631//fatty acid metabolic process	K07425//alkane 1-monooxygenase [EC:1.14.15.3];K17687//alkane 1-monooxygenase [EC:1.14.15.3]	NP_113793.2//cytochrome P450 4A12 [Rattus norvegicus]
226419	Dyrk3	2072	18.6164	64.4174	1.79087	0.00428553	Up	0.000175817	GO:0043231//intracellular membrane-bounded organelle;GO:0010494//cytoplasmic stress granule;GO:0005634//nucleus;GO:0005654//nucleoplasm;GO:0005829//cytosol;GO:0005737//cytoplasm	GO:0000287//magnesium ion binding;GO:0004713//protein tyrosine kinase activity;GO:0004712//protein serine/threonine/tyrosine kinase activity;GO:0004674//protein serine/threonine kinase activity;GO:0005524//ATP binding;GO:0004672//protein kinase activity	GO:0080135//regulation of cellular response to stress;GO:0006468//protein phosphorylation;GO:0043066//negative regulation of apoptotic process;GO:1903432//regulation of TORC1 signaling;GO:0030218//erythrocyte differentiation;GO:0043518//negative regulation of DNA damage response, signal transduction by p53 class mediator;GO:0035617//stress granule disassembly;GO:0018108//peptidyl-tyrosine phospho…	K18669//dual specificity tyrosine-phosphorylation-regulated kinase 2/3/4 [EC:2.7.12.1]	NP_663483.1//dual specificity tyrosine-phosphorylation-regulated kinase 3 [Mus musculus]
78925	Srd5a1	2681	1678.24	5916.01	1.81768	2.47581e-11	Up	6.19708e-14	GO:0043231//intracellular membrane-bounded organelle;GO:0070852//cell body fiber;GO:0031090//organelle membrane;GO:0043209//myelin sheath;GO:0048471//perinuclear region of cytoplasm;GO:0043025//neuronal cell body;GO:0016021//integral component of membrane;GO:0005789//endoplasmic reticulum membrane	GO:0033218//amide binding;GO:0047751//cholestenone 5-alpha-reductase activity;GO:0003865//3-oxo-5-alpha-steroid 4-dehydrogenase activity;GO:0070402//NADPH binding	GO:0030540//female genitalia development;GO:0009267//cellular response to starvation;GO:0021766//hippocampus development;GO:0021854//hypothalamus development;GO:0043627//response to estrogen;GO:0008584//male gonad development;GO:0014850//response to muscle activity;GO:0021987//cerebral cortex development;GO:0021983//pituitary gland development;GO:0071363//cellular response to growth factor stimul…	K12343//3-oxo-5-alpha-steroid 4-dehydrogenase 1 [EC:1.3.1.22]	NP_780492.2//3-oxo-5-alpha-steroid 4-dehydrogenase 1 [Mus musculus]
319262	Fchsd1	4227	10.0079	36.6389	1.87224	0.0102089	Up	0.000520418	GO:0031594//neuromuscular junction;GO:0055037//recycling endosome	NA	GO:0030833//regulation of actin filament polymerization;GO:0007274//neuromuscular synaptic transmission	K20125//F-BAR and double SH3 domains protein	EDL10106.1//FCH and double SH3 domains 1, isoform CRA_f, partial [Mus musculus]
27400	Hsd17b6	1479	968.836	3554.72	1.87541	0.0294431	Up	0.00203964	GO:0005783//endoplasmic reticulum;GO:0031901//early endosome membrane;GO:0016021//integral component of membrane	GO:0004745//retinol dehydrogenase activity;GO:0004303//estradiol 17-beta-dehydrogenase activity;GO:0047035//testosterone dehydrogenase (NAD+) activity;GO:0016491//oxidoreductase activity	GO:0008202//steroid metabolic process	K13369//17beta-estradiol 17-dehydrogenase / all-trans-retinol dehydrogenase (NAD+) / 3alpha(17beta)-hydroxysteroid dehydrogenase (NAD+) [EC:1.1.1.62 1.1.1.105 1.1.1.239]	EDL24533.1//hydroxysteroid (17-beta) dehydrogenase 9, isoform CRA_b, partial [Mus musculus]
216441	Slc26a10	2215	7.98228	29.5765	1.88958	0.00966437	Up	0.000483884	GO:0016021//integral component of membrane	GO:0008271//secondary active sulfate transmembrane transporter activity	NA	K14707//solute carrier family 26, member 10	NP_808283.2//solute carrier family 26 member 10 [Mus musculus]
NM_001305844	Apoe	1208	408.889	1530.96	1.90465	2.25734e-05	Up	3.52796e-07	GO:0005783//endoplasmic reticulum;GO:0072562//blood microparticle;GO:0042627//chylomicron;GO:0005829//cytosol;GO:0106003//amyloid-beta complex	GO:0016209//antioxidant activity;GO:0001540//amyloid-beta binding;GO:0015485//cholesterol binding;GO:0008201//heparin binding;GO:0017127//cholesterol transporter activity	GO:0072358//cardiovascular system development;GO:0048844//artery morphogenesis;GO:0042982//amyloid precursor protein metabolic process;GO:0006874//cellular calcium ion homeostasis;GO:0097113//AMPA glutamate receptor clustering	K04524//apolipoprotein E	NP_033826.2//apolipoprotein E precursor [Mus musculus]
19215	Ptgds	806	7.97079	30.1888	1.92122	0.0134728	Up	0.000739439	GO:0070062//extracellular exosome;GO:0031965//nuclear membrane;GO:0005615//extracellular space;GO:0005635//nuclear envelope;GO:0005791//rough endoplasmic reticulum;GO:0048471//perinuclear region of cytoplasm;GO:0005794//Golgi apparatus;GO:0005576//extracellular region	GO:0004667//prostaglandin-D synthase activity;GO:0005504//fatty acid binding;GO:0005215//transporter activity;GO:0005501//retinoid binding	GO:0006810//transport;GO:2000255//negative regulation of male germ cell proliferation;GO:0051384//response to glucocorticoid;GO:0001516//prostaglandin biosynthetic process;GO:0045187//regulation of circadian sleep/wake cycle, sleep	K01830//prostaglandin-H2 D-isomerase [EC:5.3.99.2]	EDL08248.1//prostaglandin D2 synthase (brain), isoform CRA_a, partial [Mus musculus]
434674	Slc22a28	2004	18.7431	72.7672	1.95693	5.623e-05	Up	1.03672e-06	GO:0005887//integral component of plasma membrane	GO:0015143//urate transmembrane transporter activity;GO:0005452//inorganic anion exchanger activity;GO:0015347//sodium-independent organic anion transmembrane transporter activity	GO:0043252//sodium-independent organic anion transport;GO:0015747//urate transport	K08206//MFS transporter, OCT family, solute carrier family 22 (organic anion/cation transporter), member 9/10/19/24/25	NP_795976.1//integral membrane transport protein UST1R [Mus musculus]
75404	Arhgap36	3039	12.4486	48.3724	1.95821	0.0313346	Up	0.00221332	NA	GO:0005096//GTPase activator activity	GO:0007165//signal transduction	K20648//Rho GTPase-activating protein 36	NP_001074592.1//rho GTPase-activating protein 36 [Mus musculus]
21816	Tgm1	2791	48.1304	187.618	1.96278	3.03478e-08	Up	2.1677e-10	GO:0031224//intrinsic component of membrane;GO:0070062//extracellular exosome;GO:0005913//cell-cell adherens junction	GO:0046872//metal ion binding;GO:0003810//protein-glutamine gamma-glutamyltransferase activity	GO:0018149//peptide cross-linking;GO:0009887//animal organ morphogenesis;GO:0019538//protein metabolic process;GO:0030216//keratinocyte differentiation;GO:0010838//positive regulation of keratinocyte proliferation;GO:0031424//keratinization;GO:0045787//positive regulation of cell cycle	K05619//transglutaminase 1 [EC:2.3.2.13]	NP_064368.3//protein-glutamine gamma-glutamyltransferase K [Mus musculus]
12346	Car1	1190	33.4358	131.02	1.97032	0.00466755	Up	0.000195763	GO:0070062//extracellular exosome;GO:0005737//cytoplasm	GO:0016836//hydro-lyase activity;GO:0008270//zinc ion binding;GO:0004089//carbonate dehydratase activity;GO:0004064//arylesterase activity	GO:0006730//one-carbon metabolic process	K01672//carbonic anhydrase [EC:4.2.1.1]	AAA37354.1//carbonic anhydrase I [Mus musculus]
108114	Slc22a7	2007	336.427	1325.52	1.97819	3.33777e-06	Up	3.95315e-08	GO:0016323//basolateral plasma membrane;GO:0005887//integral component of plasma membrane;GO:0016021//integral component of membrane	GO:0005452//inorganic anion exchanger activity;GO:0008514//organic anion transmembrane transporter activity;GO:0015347//sodium-independent organic anion transmembrane transporter activity	GO:0043252//sodium-independent organic anion transport;GO:0015711//organic anion transport;GO:0035634//response to stilbenoid	K08204//MFS transporter, OCT family, solute carrier family 22 (organic anion transporter), member 7	NP_659105.2//solute carrier family 22 member 7 [Mus musculus]
11727	Ang	842	1023.13	4036.1	1.97997	7.5336e-19	Up	4.13934e-22	GO:0070062//extracellular exosome;GO:0005605//basal lamina;GO:0005634//nucleus;GO:0005615//extracellular space;GO:0031410//cytoplasmic vesicle;GO:0032311//angiogenin-PRI complex;GO:0043025//neuronal cell body;GO:0030426//growth cone;GO:0005730//nucleolus;GO:0005623//cell;GO:0005576//extracellular region	GO:0003723//RNA binding;GO:0003677//DNA binding;GO:0005102//receptor binding;GO:0042277//peptide binding;GO:0042803//protein homodimerization activity;GO:0003676//nucleic acid binding;GO:0003779//actin binding;GO:0005507//copper ion binding;GO:0008201//heparin binding;GO:0004540//ribonuclease activity;GO:0004519//endonuclease activity	GO:0061844//antimicrobial humoral immune response mediated by antimicrobial peptide;GO:0032148//activation of protein kinase B activity;GO:0016477//cell migration;GO:0032431//activation of phospholipase A2 activity;GO:0017148//negative regulation of translation;GO:0001938//positive regulation of endothelial cell proliferation;GO:0050830//defense response to Gram-positive bacterium;GO:0001878//res…	K16631//angiogenin [EC:3.1.27.-]	NP_031473.1//angiogenin precursor [Mus musculus]
380997	Cyp2d12	1624	26.3969	105.356	1.99683	0.000287207	Up	6.8032e-06	NA	NA	NA	K07414//cytochrome P450 family 2 subfamily D [EC:1.14.14.1]	XP_021010983.1//cytochrome P450 2D9-like isoform X1 [Mus caroli]
76408	Abcc3	5002	1105.09	4416.31	1.99868	1.22809e-16	Up	9.74674e-20	GO:0016323//basolateral plasma membrane;GO:0005887//integral component of plasma membrane	GO:0005524//ATP binding;GO:0015432//bile acid-exporting ATPase activity;GO:0042626//ATPase activity, coupled to transmembrane movement of substances;GO:0008559//xenobiotic transmembrane transporting ATPase activity;GO:0015238//drug transmembrane transporter activity	GO:0014070//response to organic cyclic compound;GO:0010243//response to organonitrogen compound;GO:0032496//response to lipopolysaccharide;GO:0015722//canalicular bile acid transport;GO:0015893//drug transport;GO:0032355//response to estradiol;GO:0010033//response to organic substance;GO:0006855//drug transmembrane transport	K05667//ATP-binding cassette, subfamily C (CFTR/MRP), member 3	XP_021032085.1//canalicular multispecific organic anion transporter 2 isoform X2 [Mus caroli]
29873	Cspg5	3800	56.5189	227.625	2.00985	0.00112827	Up	3.46472e-05	GO:0009986//cell surface;GO:0005794//Golgi apparatus;GO:0016021//integral component of membrane;GO:0005789//endoplasmic reticulum membrane;GO:0005886//plasma membrane;GO:0030660//Golgi-associated vesicle membrane;GO:0000139//Golgi membrane	NA	GO:0007399//nervous system development;GO:0030154//cell differentiation;GO:0040008//regulation of growth;GO:0050804//modulation of chemical synaptic transmission	K08116//chondroitin sulfate proteoglycan 5	XP_021028343.1//chondroitin sulfate proteoglycan 5 isoform X1 [Mus caroli];XP_021028344.1//chondroitin sulfate proteoglycan 5 isoform X2 [Mus caroli]
238323	Rps6kl1	2534	6.91941	27.9322	2.01321	0.0368437	Up	0.00273516	GO:0005840//ribosome;GO:0005737//cytoplasm	GO:0004674//protein serine/threonine kinase activity;GO:0005524//ATP binding	GO:0007165//signal transduction	K20839//ribosomal protein S6 kinase-like	NP_666356.2//ribosomal protein S6 kinase-like 1 [Mus musculus]
103406	Zfr2	3358	5.56411	22.5739	2.02044	0.0353042	Up	0.00258855	NA	GO:0003723//RNA binding;GO:0005524//ATP binding;GO:0008270//zinc ion binding;GO:0016740//transferase activity	GO:0006955//immune response	K08888//megakaryocyte-associated tyrosine kinase [EC:2.7.10.2];K13203//zinc finger RNA-binding protein	NP_001030067.2//zinc finger RNA-binding protein 2 [Mus musculus]
24110	Usp18	1778	25.6201	105.003	2.03509	0.000318669	Up	7.64573e-06	GO:0005634//nucleus;GO:0005829//cytosol	GO:0036459//thiol-dependent ubiquitinyl hydrolase activity;GO:0019785//ISG15-specific protease activity	GO:0050727//regulation of inflammatory response;GO:0006511//ubiquitin-dependent protein catabolic process;GO:0035634//response to stilbenoid;GO:0016579//protein deubiquitination	K11846//ubiquitin carboxyl-terminal hydrolase 18/41 [EC:3.4.19.12]	NP_036039.2//ubl carboxyl-terminal hydrolase 18 [Mus musculus]
99899	Ifi44	2916	4.4865	19.3922	2.11182	0.0476674	Up	0.00375402	NA	NA	NA	NA	XP_021052389.1//interferon-induced protein 44 [Mus pahari]
94071	Clec2h	2160	12.4849	54.1007	2.11546	0.000411288	Up	1.03701e-05	NA	NA	NA	K10071//C-type lectin domain family 2 member B;K10072//C-type lectin domain family 2 member D	EDK99898.1//C-type lectin domain family 2, member h [Mus musculus]
17329	Cxcl9	2905	21.8275	95.5272	2.12977	0.0119137	Up	0.000635691	NA	NA	NA	K05416//C-X-C motif chemokine 9	AAA39706.1//gamma interferon induced monokine [Mus musculus]
58203	Zbp1	1270	7.24261	32.0942	2.14773	0.0046982	Up	0.000197909	GO:0005634//nucleus;GO:0005829//cytosol;GO:0005737//cytoplasm	GO:0003723//RNA binding;GO:0003677//DNA binding;GO:0003726//double-stranded RNA adenosine deaminase activity;GO:0003692//left-handed Z-DNA binding	GO:0051607//defense response to virus;GO:0016032//viral process;GO:0045087//innate immune response;GO:0060340//positive regulation of type I interferon-mediated signaling pathway	K12965//Z-DNA binding protein 1	NP_001132991.1//Z-DNA-binding protein 1 isoform 2 [Mus musculus];NP_067369.2//Z-DNA-binding protein 1 isoform 1 [Mus musculus]
332110	Mapk15	1961	30.4902	138.911	2.18774	9.32665e-13	Up	1.65124e-15	GO:0005634//nucleus;GO:0005737//cytoplasm	GO:0005524//ATP binding;GO:0004707//MAP kinase activity	GO:1904355//positive regulation of telomere capping;GO:0010468//regulation of gene expression;GO:0032212//positive regulation of telomere maintenance via telomerase;GO:0051973//positive regulation of telomerase activity;GO:0046777//protein autophosphorylation	K19603//mitogen-activated protein kinase 15 [EC:2.7.11.24]	EDL29511.1//mitogen-activated protein kinase 15, partial [Mus musculus]
226098	Hectd2	4771	74.6149	344.573	2.20727	2.13246e-10	Up	7.16026e-13	GO:0005737//cytoplasm	GO:0061630//ubiquitin protein ligase activity;GO:0004842//ubiquitin-protein transferase activity	NA	K12232//E3 ubiquitin-protein ligase HECTD2 [EC:2.3.2.26]	NP_766225.2//probable E3 ubiquitin-protein ligase HECTD2 isoform 2 [Mus musculus];NP_001156943.1//probable E3 ubiquitin-protein ligase HECTD2 isoform 1 [Mus musculus]
331535	Serpina7	2368	309.812	1434.35	2.21093	2.44165e-09	Up	1.23722e-11	GO:0070062//extracellular exosome	NA	GO:0070327//thyroid hormone transport	K20734//thyroxine-binding globulin	XP_021009018.1//thyroxine-binding globulin isoform X3 [Mus caroli]
69638	Enho	1264	8.30727	39.3582	2.24422	0.0225238	Up	0.00143283	NA	NA	NA	NA	BAC34290.1//unnamed protein product, partial [Mus musculus]
216233	Socs2	2113	33.1571	158.07	2.25317	0.000347805	Up	8.4297e-06	GO:0005737//cytoplasm	GO:0004860//protein kinase inhibitor activity;GO:0008269//JAK pathway signal transduction adaptor activity;GO:0005131//growth hormone receptor binding;GO:0005159//insulin-like growth factor receptor binding	GO:0001558//regulation of cell growth;GO:0007595//lactation;GO:0045666//positive regulation of neuron differentiation;GO:0040014//regulation of multicellular organism growth;GO:0016567//protein ubiquitination;GO:0046426//negative regulation of JAK-STAT cascade;GO:0035556//intracellular signal transduction;GO:0032870//cellular response to hormone stimulus;GO:0006469//negative regulation of protein…	K04695//suppressor of cytokine signaling 2	XP_017169391.1//PREDICTED: suppressor of cytokine signaling 2 isoform X5 [Mus musculus]
233115	Dpy19l3	7671	30.8159	153.563	2.31709	1.00758e-09	Up	4.24441e-12	NA	NA	NA	NA	XP_021023760.1//probable C-mannosyltransferase DPY19L3 [Mus caroli]
71724	Aox3	4360	1218.41	6126.74	2.33012	0.030353	Up	0.00213472	NA	NA	NA	K00157//aldehyde oxidase [EC:1.2.3.1]	XP_007611182.1//PREDICTED: aldehyde oxidase 3 isoform X2 [Cricetulus griseus]
100689	Spon2	2237	40.5525	204.34	2.33311	1.13412e-05	Up	1.61627e-07	GO:0070062//extracellular exosome;GO:0005615//extracellular space;GO:0005578//proteinaceous extracellular matrix	GO:0046872//metal ion binding;GO:0001530//lipopolysaccharide binding;GO:0003823//antigen binding	GO:0050832//defense response to fungus;GO:0032755//positive regulation of interleukin-6 production;GO:0051607//defense response to virus;GO:0071222//cellular response to lipopolysaccharide;GO:0032496//response to lipopolysaccharide;GO:0042742//defense response to bacterium;GO:0002448//mast cell mediated immunity;GO:0032760//positive regulation of tumor necrosis factor production;GO:0007155//cell …	K06532//prominin 1	NP_598664.3//spondin-2 precursor [Mus musculus]
232560	Caprin2	3713	5.53365	28.3001	2.3545	0.00992543	Up	0.000504149	GO:0005634//nucleus;GO:0005829//cytosol;GO:0005813//centrosome;GO:0005739//mitochondrion;GO:0005886//plasma membrane;GO:0005737//cytoplasm;GO:0043235//receptor complex	GO:0003723//RNA binding;GO:0046872//metal ion binding;GO:0005102//receptor binding	GO:0030308//negative regulation of cell growth;GO:0050775//positive regulation of dendrite morphogenesis;GO:0017148//negative regulation of translation;GO:0045944//positive regulation of transcription from RNA polymerase II promoter;GO:0033138//positive regulation of peptidyl-serine phosphorylation;GO:0061003//positive regulation of dendritic spine morphogenesis;GO:0032092//positive regulation of…	K18744//caprin-2	NP_853519.2//caprin-2 isoform 1 [Mus musculus];BAC98270.1//mKIAA1873 protein, partial [Mus musculus]
233066	Syne4	1313	18.0496	94.8828	2.39418	4.24208e-06	Up	5.30908e-08	GO:0034993//LINC complex;GO:0016021//integral component of membrane;GO:0031309//integral component of nuclear outer membrane	NA	GO:0045198//establishment of epithelial cell apical/basal polarity	K19346//nesprin-2	NP_001277494.1//nesprin-4 isoform 2 [Mus musculus];NP_705805.1//nesprin-4 isoform 1 [Mus musculus]
17381	Mmp12	3607	12.4456	65.6549	2.39927	0.0288745	Up	0.00198314	GO:0031012//extracellular matrix;GO:0005634//nucleus;GO:0005615//extracellular space;GO:0005576//extracellular region;GO:0005737//cytoplasm;GO:0005578//proteinaceous extracellular matrix	GO:0004252//serine-type endopeptidase activity;GO:0004222//metalloendopeptidase activity;GO:0005518//collagen binding;GO:0005509//calcium ion binding;GO:0008270//zinc ion binding;GO:0043565//sequence-specific DNA binding;GO:0001047//core promoter binding	GO:0014070//response to organic cyclic compound;GO:0000122//negative regulation of transcription from RNA polymerase II promoter;GO:1901163//regulation of trophoblast cell migration;GO:0060054//positive regulation of epithelial cell proliferation involved in wound healing;GO:0042493//response to drug;GO:0010628//positive regulation of gene expression;GO:0060340//positive regulation of type I inte…	K01413//matrix metalloproteinase-12 (macrophage elastase) [EC:3.4.24.65]	NP_032631.3//macrophage metalloelastase isoform 1 preproprotein [Mus musculus]
71898	Apol9b	1525	155.601	829.82	2.41494	4.90249e-17	Up	3.29227e-20	GO:0005576//extracellular region	GO:0008289//lipid binding	GO:0006869//lipid transport;GO:0042157//lipoprotein metabolic process	K14480//apolipoprotein L	EDL29646.1//RIKEN cDNA 2310016F22, isoform CRA_a, partial [Mus musculus];EDL29648.1//RIKEN cDNA 2310016F22, isoform CRA_c, partial [Mus musculus]
17952	Naip6	6705	3.44732	18.4866	2.42293	0.0280875	Up	0.00191526	GO:0005634//nucleus;GO:0072557//IPAF inflammasome complex	GO:0046872//metal ion binding;GO:0043027//cysteine-type endopeptidase inhibitor activity involved in apoptotic process;GO:0005524//ATP binding;GO:0004842//ubiquitin-protein transferase activity	GO:0016045//detection of bacterium;GO:0070269//pyroptosis;GO:0050829//defense response to Gram-negative bacterium;GO:1990001//inhibition of cysteine-type endopeptidase activity involved in apoptotic process;GO:0042742//defense response to bacterium;GO:0045087//innate immune response;GO:0090263//positive regulation of canonical Wnt signaling pathway;GO:0006954//inflammatory response	K12807//baculoviral IAP repeat-containing protein 1	Q9R016.2//RecName: Full=Baculoviral IAP repeat-containing protein 1e; AltName: Full=Neuronal apoptosis inhibitory protein 5
15957	Ifit1	2638	10.0146	54.6209	2.44735	0.00118267	Up	3.67014e-05	GO:0005737//cytoplasm	GO:0003723//RNA binding	GO:0035458//cellular response to interferon-beta;GO:0051607//defense response to virus;GO:0009615//response to virus;GO:0045087//innate immune response;GO:0035457//cellular response to interferon-alpha	K14217//interferon-induced protein with tetratricopeptide repeats 1	NP_032357.2//interferon-induced protein with tetratricopeptide repeats 1 [Mus musculus]
213393	Depp1	1316	195.526	1066.83	2.44789	3.9914e-11	Up	1.07341e-13	GO:0005739//mitochondrion	NA	NA	NA	NP_666092.1//protein DEPP [Mus musculus]
209268	Igsf1	1834	4.15422	23.3706	2.49205	0.0342391	Up	0.00248328	GO:0016020//membrane;GO:0016021//integral component of membrane;GO:0005576//extracellular region	GO:0004872//receptor activity;GO:0034711//inhibin binding;GO:0015026//coreceptor activity	GO:0007165//signal transduction;GO:0006355//regulation of transcription, DNA-templated	K06512//leukocyte immunoglobulin-like receptor	XP_006541545.1//PREDICTED: immunoglobulin superfamily member 1 isoform X3 [Mus musculus];NP_808259.2//immunoglobulin superfamily member 1 isoform long precursor [Mus musculus];NP_899178.2//immunoglobulin superfamily member 1 isoform 3 precursor [Mus musculus];NP_808583.1//immunoglobulin superfamily member 1 isoform short precursor [Mus musculus]
233799	Acsm2	6581	14.9237	84.8366	2.50708	9.33273e-05	Up	1.81337e-06	NA	GO:0003824//catalytic activity	GO:0008152//metabolic process	K01896//medium-chain acyl-CoA synthetase [EC:6.2.1.2]	XP_021508674.1//acyl-coenzyme A synthetase ACSM2, mitochondrial [Meriones unguiculatus];AAH78721.1//Acyl-CoA synthetase medium-chain family member 2 [Rattus norvegicus]
71830	Pdilt	2139	42.2934	244.226	2.52971	2.0775e-11	Up	4.81959e-14	GO:0005783//endoplasmic reticulum	GO:0003756//protein disulfide isomerase activity	GO:0006457//protein folding;GO:0019511//peptidyl-proline hydroxylation;GO:0016477//cell migration;GO:1902175//regulation of oxidative stress-induced intrinsic apoptotic signaling pathway;GO:0007275//multicellular organism development;GO:0034976//response to endoplasmic reticulum stress;GO:0007286//spermatid development;GO:0045454//cell redox homeostasis	K20354//protein disulfide-isomerase-like protein of the testis	XP_006508276.2//PREDICTED: protein disulfide-isomerase-like protein of the testis isoform X1 [Mus musculus]
16008	Igfbp2	1342	523.724	3241.5	2.62979	5.80456e-15	Up	6.02426e-18	GO:0070062//extracellular exosome;GO:0005615//extracellular space;GO:0016324//apical plasma membrane;GO:0031410//cytoplasmic vesicle;GO:0005576//extracellular region	GO:0031994//insulin-like growth factor I binding;GO:0005520//insulin-like growth factor binding;GO:0031995//insulin-like growth factor II binding	GO:0001558//regulation of cell growth;GO:0009612//response to mechanical stimulus;GO:0042493//response to drug;GO:0007565//female pregnancy;GO:0007165//signal transduction;GO:0010226//response to lithium ion;GO:0043567//regulation of insulin-like growth factor receptor signaling pathway;GO:0032526//response to retinoic acid;GO:0043627//response to estrogen;GO:0032870//cellular response to hormone…	K10138//insulin-like growth factor-binding protein 3	NP_032368.2//insulin-like growth factor-binding protein 2 isoform 1 precursor [Mus musculus]
71874	Mab21l4	2293	5.89224	36.519	2.63176	0.00134775	Up	4.25389e-05	NA	NA	NA	NA	XP_021027084.1//uncharacterized protein C2orf54 homolog [Mus caroli]
12550	Cdh1	4413	118.652	757.621	2.67474	4.76904e-12	Up	1.01903e-14	GO:0016323//basolateral plasma membrane;GO:0071944//cell periphery;GO:0030054//cell junction;GO:0005737//cytoplasm;GO:0030864//cortical actin cytoskeleton;GO:0005913//cell-cell adherens junction;GO:0005911//cell-cell junction;GO:0016021//integral component of membrane;GO:0009898//cytoplasmic side of plasma membrane;GO:0015629//actin cytoskeleton;GO:0016328//lateral plasma membrane;GO:0043296//api…	GO:0045295//gamma-catenin binding;GO:0050839//cell adhesion molecule binding;GO:0042802//identical protein binding;GO:0008092//cytoskeletal protein binding;GO:0019903//protein phosphatase binding;GO:0045296//cadherin binding;GO:0019904//protein domain specific binding;GO:0005509//calcium ion binding;GO:0045294//alpha-catenin binding;GO:0030506//ankyrin binding;GO:0008013//beta-catenin binding;GO:…	GO:0001829//trophectodermal cell differentiation;GO:0051260//protein homooligomerization;GO:0060693//regulation of branching involved in salivary gland morphogenesis;GO:0007566//embryo implantation;GO:2000008//regulation of protein localization to cell surface;GO:0010955//negative regulation of protein processing;GO:0090090//negative regulation of canonical Wnt signaling pathway;GO:0022408//negat…	K05689//cadherin 1, type 1, E-cadherin	NP_033994.1//cadherin-1 preproprotein [Mus musculus]
70377	Derl3	1336	6.9562	45.3789	2.70565	0.000654899	Up	1.83961e-05	GO:0030176//integral component of endoplasmic reticulum membrane;GO:0048500//signal recognition particle;GO:0005785//signal recognition particle receptor complex	NA	GO:0018279//protein N-linked glycosylation via asparagine;GO:0030433//ubiquitin-dependent ERAD pathway;GO:1904153//negative regulation of retrograde protein transport, ER to cytosol;GO:0030968//endoplasmic reticulum unfolded protein response	K13989//Derlin-2/3	XP_002925095.1//PREDICTED: derlin-3 isoform X2 [Ailuropoda melanoleuca]
94179	Krt23	1560	7.97032	52.7463	2.72636	0.000229394	Up	5.2797e-06	GO:0005882//intermediate filament	GO:0005198//structural molecule activity	NA	K07604//type I keratin, acidic	NP_203537.1//keratin, type I cytoskeletal 23 [Mus musculus]
242125	Mab21l3	3558	4.47886	29.6707	2.72783	0.0242114	Up	0.00158897	NA	NA	NA	K17834//cyclic GMP-AMP synthase [EC:2.7.7.86]	NP_758499.3//protein mab-21-like 3 [Mus musculus]
66825	Rnf186	1273	17.3201	115.566	2.73819	4.13957e-13	Up	6.82346e-16	GO:0016021//integral component of membrane	GO:0046872//metal ion binding	NA	K15705//E3 ubiquitin-protein ligase RNF152 [EC:2.3.2.27];K12026//tripartite motif-containing protein 56 [EC:2.3.2.27];K11983//E3 ubiquitin-protein ligase RNF182 [EC:2.3.2.27]	NP_080062.4//RING finger protein 186 [Mus musculus]
246730	Oas1a	1889	5.85357	40.3682	2.78583	0.00207782	Up	7.29392e-05	GO:0005634//nucleus;GO:0005783//endoplasmic reticulum;GO:0005829//cytosol;GO:0005739//mitochondrion;GO:0005737//cytoplasm	GO:0005524//ATP binding;GO:0008270//zinc ion binding;GO:0001730//2'-5'-oligoadenylate synthetase activity;GO:0003725//double-stranded RNA binding	GO:0048525//negative regulation of viral process;GO:0006955//immune response;GO:0006164//purine nucleotide biosynthetic process;GO:0051607//defense response to virus;GO:0009615//response to virus;GO:0045087//innate immune response	K14216//2'-5'-oligoadenylate synthetase [EC:2.7.7.84]	XP_006530393.1//PREDICTED: 2'-5'-oligoadenylate synthase 1A isoform X1 [Mus musculus]
12504	Cd4	3095	14.2789	110.22	2.94842	2.76877e-05	Up	4.53778e-07	GO:0005788//endoplasmic reticulum lumen;GO:0009986//cell surface;GO:0045121//membrane raft;GO:0005887//integral component of plasma membrane;GO:0009897//external side of plasma membrane;GO:0005789//endoplasmic reticulum membrane;GO:0005886//plasma membrane	GO:0042011//interleukin-16 binding;GO:1990782//protein tyrosine kinase binding;GO:0042012//interleukin-16 receptor activity;GO:0019865//immunoglobulin binding;GO:0042803//protein homodimerization activity;GO:0015026//coreceptor activity;GO:0019901//protein kinase binding;GO:0042289//MHC class II protein binding;GO:0008270//zinc ion binding;GO:0019899//enzyme binding	GO:0050863//regulation of T cell activation;GO:0050731//positive regulation of peptidyl-tyrosine phosphorylation;GO:0050850//positive regulation of calcium-mediated signaling;GO:0035397//helper T cell enhancement of adaptive immune response;GO:0050829//defense response to Gram-negative bacterium;GO:0032507//maintenance of protein location in cell;GO:0042102//positive regulation of T cell prolifer…	K06454//T-cell surface glycoprotein CD4	NP_038516.1//T-cell surface glycoprotein CD4 precursor [Mus musculus]
14738	Gpr12	2385	9.38976	75.2011	3.00159	5.50197e-06	Up	7.02022e-08	GO:0016021//integral component of membrane;GO:0005886//plasma membrane	GO:0031210//phosphatidylcholine binding;GO:0004930//G-protein coupled receptor activity	GO:0007186//G-protein coupled receptor signaling pathway;GO:0006874//cellular calcium ion homeostasis	K04315//G protein-coupled receptor 12	NP_032177.1//G-protein coupled receptor 12 [Mus musculus]
211323	Nrg1	2103	4.14823	34.1926	3.04312	0.0399105	Up	0.003014	GO:0030425//dendrite;GO:0030424//axon;GO:0005634//nucleus;GO:0005654//nucleoplasm;GO:0005615//extracellular space;GO:0009897//external side of plasma membrane;GO:0031594//neuromuscular junction;GO:0030673//axolemma;GO:0005737//cytoplasm;GO:0044297//cell body;GO:0005887//integral component of plasma membrane;GO:0005576//extracellular region;GO:0045202//synapse;GO:0005886//plasma membrane	GO:0005176//ErbB-2 class receptor binding;GO:0005178//integrin binding;GO:0045499//chemorepellent activity;GO:0003712//transcription cofactor activity;GO:0030971//receptor tyrosine kinase binding;GO:0043125//ErbB-3 class receptor binding	GO:0050731//positive regulation of peptidyl-tyrosine phosphorylation;GO:0016477//cell migration;GO:1903955//positive regulation of protein targeting to mitochondrion;GO:0042177//negative regulation of protein catabolic process;GO:0048738//cardiac muscle tissue development;GO:0007420//brain development;GO:0008366//axon ensheathment;GO:0022008//neurogenesis;GO:0031643//positive regulation of myelin…	K05455//neuregulin 1	NP_848706.2//pro-neuregulin-1, membrane-bound isoform [Mus musculus]
223672	Apol9a	1508	58.4851	525.842	3.16849	8.92721e-11	Up	2.79248e-13	GO:0005576//extracellular region	GO:0008289//lipid binding	GO:0006869//lipid transport;GO:0042157//lipoprotein metabolic process	K14480//apolipoprotein L	EDL29646.1//RIKEN cDNA 2310016F22, isoform CRA_a, partial [Mus musculus];EDL29648.1//RIKEN cDNA 2310016F22, isoform CRA_c, partial [Mus musculus]
226143	Cyp2c23	1960	720.604	7138.5	3.30834	3.2335e-29	Up	5.92216e-33	NA	GO:0016705//oxidoreductase activity, acting on paired donors, with incorporation or reduction of molecular oxygen;GO:0020037//heme binding;GO:0005506//iron ion binding;GO:0004497//monooxygenase activity	NA	K07413//cytochrome P450 family 2 subfamily C [EC:1.14.14.1]	P24470.2//RecName: Full=Cytochrome P450 2C23; AltName: Full=Arachidonic acid epoxygenase; AltName: Full=CYPIIC23;XP_021500330.1//cytochrome P450 2C23 [Meriones unguiculatus]
58185	Rsad2	3785	14.5543	154.077	3.40414	5.45687e-05	Up	9.99426e-07	GO:0005783//endoplasmic reticulum;GO:0005811//lipid droplet;GO:0005743//mitochondrial inner membrane;GO:0001650//fibrillar center;GO:0005739//mitochondrion;GO:0005741//mitochondrial outer membrane;GO:0005789//endoplasmic reticulum membrane	GO:0046872//metal ion binding;GO:0051539//4 iron, 4 sulfur cluster binding;GO:0043621//protein self-association;GO:0003824//catalytic activity	GO:0050709//negative regulation of protein secretion;GO:2000553//positive regulation of T-helper 2 cell cytokine production;GO:0051607//defense response to virus;GO:0034157//positive regulation of toll-like receptor 7 signaling pathway;GO:0043367//CD4-positive, alpha-beta T cell differentiation;GO:0034165//positive regulation of toll-like receptor 9 signaling pathway;GO:0045071//negative regulati…	K15045//radical S-adenosyl methionine domain-containing protein 2	NP_067359.2//radical S-adenosyl methionine domain-containing protein 2 [Mus musculus]
239037	Lrit1	4337	2.42504	31.6472	3.70599	4.31495e-05	Up	7.63941e-07	GO:0016021//integral component of membrane;GO:0005789//endoplasmic reticulum membrane	NA	NA	K16358//leucine-rich repeat and fibronectin type-III domain-containing protein 5;K16357//leucine-rich repeat and fibronectin type-III domain-containing protein 4	NP_666357.2//leucine-rich repeat, immunoglobulin-like domain and transmembrane domain-containing protein 1 precursor [Mus musculus]
209588	Sectm1a	1615	1.72405	23.2547	3.75365	0.00769711	Up	0.000366059	GO:0016021//integral component of membrane	GO:0005125//cytokine activity	GO:0006955//immune response	K06457//T-cell surface glycoprotein CD7	NP_663348.2//secreted and transmembrane protein 1A precursor [Mus musculus]
57266	Cxcl14	1848	18.3452	253.64	3.7893	0.0126941	Up	0.000691276	NA	NA	NA	K10033//C-X-C motif chemokine 14	XP_005333252.1//C-X-C motif chemokine 14 [Ictidomys tridecemlineatus]
244562	Abcc12	4511	1.3806	23.2883	4.07624	0.0210976	Up	0.00132279	GO:0016020//membrane;GO:0016021//integral component of membrane;GO:0005739//mitochondrion	GO:0005524//ATP binding;GO:0042626//ATPase activity, coupled to transmembrane movement of substances	GO:0055085//transmembrane transport	K05672//ATP-binding cassette, subfamily C (CFTR/MRP), member 12	NP_766500.3//multidrug resistance-associated protein 9 [Mus musculus]
20296	Ccl2	806	1.7289	29.7127	4.10316	0.0241868	Up	0.00158588	GO:0030425//dendrite;GO:0044299//C-fiber;GO:0030139//endocytic vesicle;GO:0043679//axon terminus	GO:0001664//G-protein coupled receptor binding;GO:0005125//cytokine activity;GO:0008201//heparin binding;GO:0031727//CCR2 chemokine receptor binding;GO:0008009//chemokine activity	GO:0043615//astrocyte cell migration;GO:0061844//antimicrobial humoral immune response mediated by antimicrobial peptide;GO:0031100//animal organ regeneration;GO:0001525//angiogenesis;GO:0006874//cellular calcium ion homeostasis;GO:0007568//aging	K14624//C-C motif chemokine 2	NP_035463.1//C-C motif chemokine 2 precursor [Mus musculus]
100039257	Tmem254b	1447	33.4778	579.883	4.11448	3.24476e-05	Up	5.52679e-07	GO:0016021//integral component of membrane	NA	NA	NA	NP_080955.1//transmembrane protein 254 isoform 1 [Mus musculus];XP_021059294.1//transmembrane protein 254 isoform X1 [Mus pahari]
626578	Gbp10	3528	1.72461	31.2407	4.17908	0.000151416	Up	3.23538e-06	GO:0070062//extracellular exosome;GO:0031410//cytoplasmic vesicle;GO:0020005//symbiont-containing vacuole membrane	GO:0005525//GTP binding;GO:0003924//GTPase activity	GO:0071346//cellular response to interferon-gamma;GO:0044406//adhesion of symbiont to host;GO:0035458//cellular response to interferon-beta;GO:0042832//defense response to protozoan;GO:0071222//cellular response to lipopolysaccharide;GO:0050830//defense response to Gram-positive bacterium	K20908//guanylate-binding protein 6	NP_001034735.2//guanylate-binding protein 10 [Mus musculus]
15945	Cxcl10	1120	2.78267	51.8053	4.21856	0.00178616	Up	6.11744e-05	GO:0005615//extracellular space;GO:0009897//external side of plasma membrane;GO:0005623//cell;GO:0005576//extracellular region	GO:0048248//CXCR3 chemokine receptor binding;GO:0008201//heparin binding;GO:0008009//chemokine activity	GO:0042127//regulation of cell proliferation;GO:1901740//negative regulation of myoblast fusion;GO:0071222//cellular response to lipopolysaccharide;GO:0032496//response to lipopolysaccharide;GO:0010332//response to gamma radiation;GO:0030816//positive regulation of cAMP metabolic process;GO:0010818//T cell chemotaxis;GO:0006935//chemotaxis;GO:2000406//positive regulation of T cell migration;GO:00…	K12671//C-X-C motif chemokine 10	NP_067249.1//C-X-C motif chemokine 10 precursor [Mus musculus]
71856	Wfdc3	820	1.03081	20.9545	4.34541	0.0401497	Up	0.00303697	GO:0005576//extracellular region	GO:0004867//serine-type endopeptidase inhibitor activity;GO:0030414//peptidase inhibitor activity	NA	K03910//alpha-2-macroglobulin	NP_082237.1//WAP four-disulfide core domain protein 3 precursor [Mus musculus]
382551	Cd300ld3	738	0.371526	8.56772	4.52738	0.0314788	Up	0.00222735	GO:0005768//endosome;GO:0016021//integral component of membrane;GO:0005764//lysosome;GO:0005886//plasma membrane;GO:0005769//early endosome	NA	GO:0034165//positive regulation of toll-like receptor 9 signaling pathway;GO:0002376//immune system process;GO:0031398//positive regulation of protein ubiquitination	K20395//CO300B/D/F antigen	NP_954671.1//CMRF35-like molecule 3 precursor [Mus musculus]
239038	Lrit2	2781	0.187865	8.76162	5.54343	0.0185026	Up	0.00111663	GO:0016021//integral component of membrane	NA	NA	K16358//leucine-rich repeat and fibronectin type-III domain-containing protein 5	NP_775594.1//leucine-rich repeat, immunoglobulin-like domain and transmembrane domain-containing protein 2 precursor [Mus musculus]
20304	Ccl5	579	0.370283	19.9205	5.74948	0.00170396	Up	5.74165e-05	NA	NA	NA	K12499//C-C motif chemokine 5	AAA40029.1//rantes [Mus musculus]
242285	Sdr16c5	1379	0.188059	15.0342	6.32092	0.00639012	Up	0.000291808	GO:0017053//transcriptional repressor complex;GO:0005634//nucleus;GO:0016021//integral component of membrane;GO:0005789//endoplasmic reticulum membrane	GO:0004745//retinol dehydrogenase activity;GO:0001191//transcriptional repressor activity, RNA polymerase II transcription factor binding;GO:0008134//transcription factor binding;GO:0033613//activating transcription factor binding	GO:0031065//positive regulation of histone deacetylation;GO:0000122//negative regulation of transcription from RNA polymerase II promoter;GO:0043616//keratinocyte proliferation;GO:0042572//retinol metabolic process;GO:0042574//retinal metabolic process;GO:0035067//negative regulation of histone acetylation	K15734//all-trans-retinol dehydrogenase (NAD+) [EC:1.1.1.105]	NP_871789.1//epidermal retinol dehydrogenase 2 [Mus musculus]
NM_001305803	Ttpal	4429	0.372811	88.6683	7.89383	3.92363e-08	Up	2.82655e-10	GO:0016020//membrane;GO:0005622//intracellular	GO:0005215//transporter activity	NA	K19625//retinaldehyde-binding protein 1	NP_001292732.1//alpha-tocopherol transfer protein-like isoform 2 [Mus musculus]
234421	Cib3	646	0.372401	98.9764	8.05408	1.23506e-08	Up	8.06785e-11	NA	GO:0000287//magnesium ion binding;GO:0005509//calcium ion binding	NA	K17259//calcium and integrin-binding protein 1;K16310//serine/threonine-protein kinase NIM1 [EC:2.7.11.1]	ERE90447.1//calcium and integrin-binding family member 3-like isoform 1 [Cricetulus griseus]
